# Supplementary material for: High-throughput, single-particle tracking reveals nested membrane domains that dictate KRasG12D diffusion and trafficking
Source: eLife journal article supplement (doi:10.7554/elife.46393), 2019-11-01
Supplement: supp [file elife-46393-supp-v1.zip]

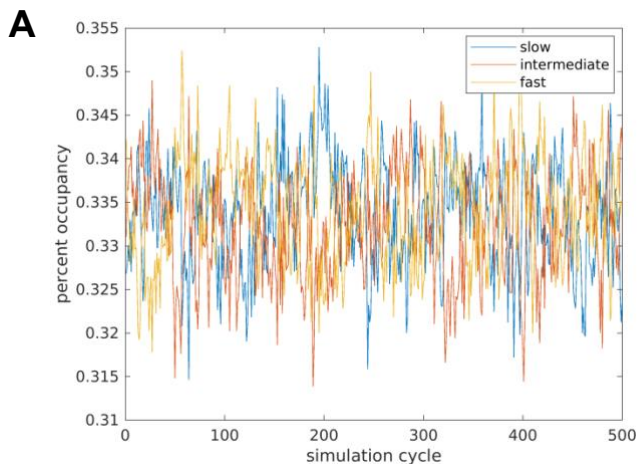

**state 1**  
 $D = 0.08 \pm 0.00 \mu\text{m}^2 \text{s}^{-1}$   
 $\text{Occu.} = 0.33 \pm 0.01$

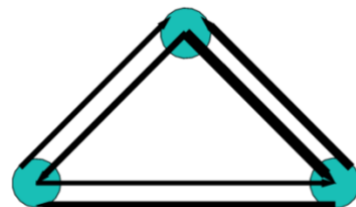

**state 2**  
 $D = 0.25 \pm 0.02 \mu\text{m}^2 \text{s}^{-1}$   
 $\text{Occu.} = 0.33 \pm 0.02$

**state 3**  
 $D = 0.83 \pm 0.04 \mu\text{m}^2 \text{s}^{-1}$   
 $\text{Occu.} = 0.34 \pm 0.02$

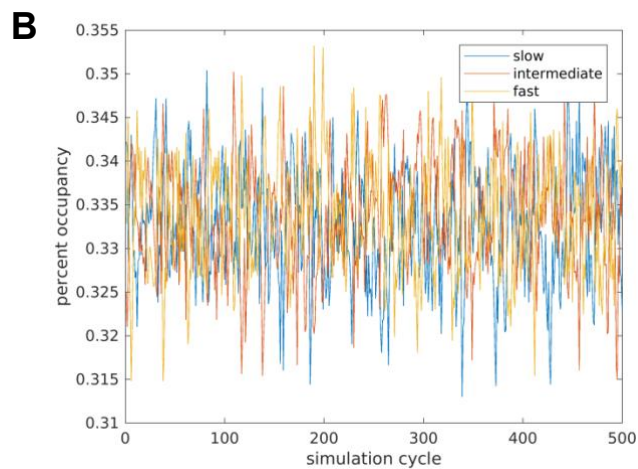

**state 1**  
 $D = 0.08 \pm 0.01 \mu\text{m}^2 \text{s}^{-1}$   
 $\text{Occu.} = 0.32 \pm 0.04$

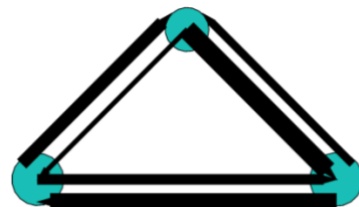

**state 2**  
 $D = 0.25 \pm 0.02 \mu\text{m}^2 \text{s}^{-1}$   
 $\text{Occu.} = 0.33 \pm 0.02$

**state 3**  
 $D = 0.83 \pm 0.02 \mu\text{m}^2 \text{s}^{-1}$   
 $\text{Occu.} = 0.35 \pm 0.02$

**Figure 4 - Figure Supplement 1 (Lee et al.)**
