# Supplementary material for: High-throughput, single-particle tracking reveals nested membrane domains that dictate KRasG12D diffusion and trafficking
Source: eLife journal article supplement (doi:10.7554/elife.46393), 2019-11-01
Supplement: supp [file elife-46393-supp-v1.zip]

Archive with 21 entries (21 files):
- elife_poa_e46393_Figure_2_source_data_1.xlsx
- elife_poa_e46393_Figure_3_source_data_1.xlsx
- elife_poa_e46393_Figure_4_figure_supplement_1.pdf
- elife_poa_e46393_Figure_1_figure_supplement_4.pdf
- elife_poa_e46393_Figure_2_figure_supplement_2.pdf
- elife_poa_e46393_Figure_4_source_data_1.xlsx
- elife_poa_e46393_Figure_6_figure_supplement_3.pdf
- elife_poa_e46393_Figure_6_figure_supplement_1.pdf
- elife_poa_e46393_Figure_1_figure_supplement_6.pdf
- elife_poa_e46393_Figure_1_figure_supplement_3.pdf
- elife_poa_e46393_Figure_6_source_data_1.xlsx
- elife_poa_e46393_Figure_1_figure_supplement_1.pdf
- elife_poa_e46393_Video_2.mov
- elife_poa_e46393_Transparent_Reporting_File.pdf
- elife_poa_e46393_Figure_2_figure_supplement_1.pdf
- elife_poa_e46393_Figure_1_figure_supplement_2.pdf
- elife_poa_e46393_Figure_5_source_data_1.xlsx
- elife_poa_e46393_Video_1.mov
- elife_poa_e46393_Figure_1_figure_supplement_5.pdf
- elife_poa_e46393_Figure_1_source_data_1.xlsx
- elife_poa_e46393_Figure_6_figure_supplement_2.pdf
