# Supplementary material for: High-throughput, single-particle tracking reveals nested membrane domains that dictate KRasG12D diffusion and trafficking
Source: eLife journal article supplement (doi:10.7554/elife.46393), 2019-11-01
Supplement: supp [file elife-46393-supp-v1.zip › elife_poa_e46393_Figure_1_source_data_1.xlsx]

## Sheet: figure 1D
Model Size
1	2	3	4
0.0246	0.0016	0.0004	0.0004
0.0414	0.0023	0.0007	0.0007
0.0396	0.0033	0.0012	0.0011
0.0423	0.0022	0.0012	0.0011
0.0452	0.0045	0.0014	0.0013
0.0466	0.0038	0.0016	0.0016
0.0401	0.0027	0.0015	0.0014
0.0425	0.0035	0.0015	0.0014

## Sheet: figure 1E
Model Size
1	2	3	4	5	6	7	8	9	10
-200	-70.1612	0	-44.2848	-107.163	-121.488	-129.619	-135.432	-139.997	-143.72
-200	-76.8276	0	-19.474	-31.4079	-90.7082	-105.535	-109.947	-113.386	-116.178
-200	-42.4597	0	-47.5602	-61.4294	-70.5541	-76.9862	-84.7179	-87.8524	-90.4035
-200	-12.3753	0	-39.3958	-87.7366	-97.4507	-104.034	-108.728	-113.723	-116.497
-200	-41.046	0	-27.6636	-39.5575	-47.2636	-52.701	-56.7513	-59.9628	-62.5978

## Sheet: figure 1F
vbSPT: diffusion (µm2/s)				CDF fit: diffusion (µm2/s)				vbSPT: occupancy (fraction)				CDF fit: occupancy (fraction)
State 1	State 2	State 3		State 1	State 2	State 3		State 1	State 2	State 3		State 1	State 2	State 3
0.0823	0.2517	0.7741		0.0841	0.1789	0.9546		0.1308	0.2906	0.5786		0.6173	0.2919	0.0908
0.091	0.2853	0.7894		0.0994	0.3203	0.8574		0.1663	0.3622	0.4715		0.1785	0.3514	0.4702
0.0731	0.287	0.8424		0.0583	0.2404	0.8006		0.1352	0.3914	0.4734		0.0866	0.4432	0.4702
0.0722	0.2438	0.8768		0.0951	0.2491	0.8065		0.1175	0.2624	0.6201		0.1636	0.3922	0.4443
0.0735	0.2786	0.7882		0.0547	0.2679	0.8317		0.1248	0.3674	0.5078		0.1202	0.3916	0.4883
				0.0953	0.4119	1.0825						0.1881	0.4076	0.4043
				0.0947	0.3198	0.8461						0.17	0.3892	0.4408
				0.0701	0.2437	0.7893						0.1485	0.4584	0.3931
