# Supplementary material for: High-throughput, single-particle tracking reveals nested membrane domains that dictate KRasG12D diffusion and trafficking
Source: eLife journal article supplement (doi:10.7554/elife.46393), 2019-11-01
Supplement: supp [file elife-46393-supp-v1.zip › elife_poa_e46393_Figure_2_source_data_1.xlsx]

## Sheet: figure 2B
immobile steps	steps before and after immobilization	all other steps
69.9282	144.324	215.167
29.9062	15.6982	194.611
63.369	96.4533	85.4768
44.1955	169.749	281.458
15.3706	79.7731	215.847
80.8104	89.469	77.5381
34.6868	147.799	90.3272
40.0342	145.652	225.028
33.1249	95.1632	95.8884
29.3484	34.6054	25.7161
48.6999	125.713	201.967
24.3246	103.795	70.6863
92.8211	311.027	45.8586
27.1905	58.8669	64.1524
68.2777	117.071	142.832
29.4957	137.212	141.011
65.3543	70.6229	109.041
64.332	70.1861	131.744
64.5874	266.548	171.44
19.2319	105.203	132.721
55.4081	12.3767	121.922
36.8244	143.331	223.933
35.7945	123.533	188.873
64.6068	119.437	173.36
90.8342	98.6857	259.112
49.2899	167.815	131.283
68.9982	26.2869	31.1411
53.3733	60.0909	112.553
34.7405	170.217	375.246
73.2917	161.808	308.008
17.4307	30.4179	162.603
37.1143	58.3586	75.5834
8.81058	35.7763	146.481
22.6136	35.0272	196.648
54.8824	197.417	115.329
53.456	87.6609	108.381
62.0124	132.4	144.619
27.4792	84.3367	263.647
36.6236	192.861	216.649
24.1157	243.023	183.905
91.1257	95.2586	220.329
50.2613	164.117	75.9562
21.7159	253.805	239.923
72.8354	90.5077	385.072
50.9536	124.453	282.64
117.275	97.371	198.959
25.8202	75.7845	274.05
28.6295	146.375	118.422
59.2424	79.4766	225.618
32.4857	8.67228	165.008
28.2485	213.51	53.8626
24.1702	179.762	161.174
38.8924	167.401	322.127
42.3848	88.1316	246.125
34.1948	327.612	241.726
49.2305	145.098	207.337
63.7089	125.133	134.707
32.0213	85.2743	293.059
18.839	83.8868	456.638
27.409	214.799	162.326
58.9168	22.4191	84.0813
45.3273	96.8183	245.611
25.0727	249.705	203.549
17.1671	70.4739	107.446
83.4637	283.05	242.693
17.7992	318.404	174.309
22.3924	169.585	135.856
25.4464	166.679	88.4554
61.6285	95.4935	233.055
25.6587	120.279	137.271
65.8343	126.349	74.5722
38.8255	167.672	204.492
36.361	317.236	104.96
10.9231	107.355	145.161
25.8663	21.5691	44.097
47.3769	74.5644	82.3698
29.9235	109.654	135.403
13.9538	149.308	95.2943
31.2568	38.7389	164.679
25.7833	79.1513	137.041
36.0062	121.398	140.192
20.6221	86.8405	124.191
6.37413	243.289	82.4004
112.064	175.814	210.412
68.9793	226.377	144.722
64.2775	126.431	330.725
57.2061	71.7628	119.648
38.5724	326.904	104.621
66.7254	114.832	144.359
45.8509	131.995	322.117
8.99718	139.848	194.502
64.597	104.363	188.117
15.6492	34.8386	85.9891
61.6208	138.037	139.731
31.5206	106.999	42.8977
21.8238	106.839	187.454
47.6386	48.4751	210.04
46.6417	106.877	107.086
43.9394	177.914	193.969
39.0051	74.9166	112.509
60.6557	179.612	108.735
71.517	47.8625	326.828
36.7472	82.5163	49.208
45.4452	101.878	115.377
50.173	135.858	185.075
47.1855	68.117	158.197
50.809	71.8621	67.8324
35.9906	92.0646	114.998
34.7104	47.9062	259.505
39.4178	112.504	164.258
57.2709	85.6513	88.9463
12.6237	119.858	161.009
31.2871	115.157	159.314
27.705	151.219	296.721
57.3233	301.332	52.0512
29.506	88.3891	239.471
54.8061	82.7092	156.856
12.0521	139.9	163.928
79.0805	107.546	101.484
69.8422	51.5545	88.9364
14.7833	96.5737	39.353
74.4996	103.435	74.6497
36.0555	24.5777	59.3791
34.8078	64.3991	63.6361
86.9259	74.9665	199.626
64.1596	133.211	58.4173
67.3063	59.5803	74.8773
60.5548	130.449	158.743
40.9986	96.6879	150.292
73.3343	148.891	23.9831
107.271	77.8349	16.9047
82.9316	106.649	83.5027
29.6185	93.7509	110.455
44.6133	115.907	116.403
42.8532	84.8524	62.2514
87.0786	42.5007	233.075
84.0676	205.69	63.8609
42.1161	288.918	141.783
12.4355	102.798	237.454
29.7377	136.462	83.5932
37.6106	398.687	61.8694
56.26	50.0104	78.5162
5.37118	108.398	42.7289
105.703	54.2498	185.653
30.2128	157.353	74.19
54.2444	204.268	361.927
30.6853	125.683	138.255
66.6083	123.06	114.051
11.8338	124.01	63.8724
6.10171	80.8317	114.629
23.7164	58.9594	266.901
52.0373	123.101	258.538
47.4855	8.62329	110.599
64.9461	76.5564	167.496
47.1756	111.857	210.89
68.95	102.248	230.136
27.7303	51.2846	171.973
36.5204	195.638	56.5279
46.3928	167.029	330.749
30.3452	64.2495	152.446
36.152	157.548	52.1337
27.6221	184.981	283.294
58.4298	103.434	189.634
87.9016	80.8757	160.432
75.5514	64.4439	184.44
72.3119	68.0993	158.974
99.1108	74.3346	221.626
24.4917	53.3736	36.5922
39.7689	393.337	134.003
9.06904	202.697	235.548
45.001	203.915	228.75
25.8996	281.066	232.78
52.2928	140.093	147.402
48.5718	76.6955	86.4932
105.981	85.6376	142.216
27.6727	112.279	130.903
119.979	58.0278	265.69
61.2328	78.686	35.4692
47.2672	92.8739	93.1178
46.7257	87.0063	289.442
101.232	322.834	403.379
62.0284	53.8386	44.2411
53.2711	106.245	276.222
43.4126	258.556	258.335
78.9717	125.249	11.9213
76.1677	26.2673	89.8511
24.1888	62.3792	106.903
35.9504	97.2187	343.546
24.8543	125.383	154.226
35.1286	67.4771	108.2
45.0748	83.0576	214.608
71.3697	206.461	30.9736
25.6426	96.6974	207.849
93.2208	123.333	81.9065
26.6152	28.9457	138.826
31.3043	210.909	235.759
7.16784	54.7377	117.455
93.2048	100.446	181.185
36.1466	208.293	113.683
104.822	67.0113	152.78
5.03828	64.0792	140.044
28.2011	165.913	79.2959
24.849	110.352	270.975
17.7728	106.004	107.479
56.6517	142.182	83.4454
82.4158	73.7546	147.214
56.1815	85.1694	106.479
42.2486	127.558	212.054
33.4975	257.58	219.046
108.791	100.713	267.899
85.9764	130.864	236.701
40.1148	47.1212	161.358
22.0051	96.6916	82.8533
10.0108	98.8357	125.908
83.9628	71.5235	33.4408
96.98	72.8502	72.06
15.9534	116.838	116.414
48.825	280.568	180.95
25.9496	104.578	65.1846
51.3105	75.3522	65.2293
32.1334	94.3256	208.83
38.4504	42.4702	132.564
111.281	207.201	254.786
130.225	61.2155	71.3815
30.9425	99.8799	184.431
28.3849	80.3803	224.56
45.0073	72.5709	62.8628
53.2137	143.602	126.983
22.0744	93.9147	279.999
81.5483	164.756	199.334
87.5603	128.322	154.844
46.7667	28.2782	173.639
62.5244	80.0825	28.1677
116.695	106.654	107.882
41.7004	82.4287	41.0479
49.9388	75.2447	150.97
26.8135	310.431	80.6517
28.3151	129.022	97.2832
46.247	112.891	178.283
57.7475	49.7235	183.562
85.3168	243.156	93.1013
27.5056	139.743	214.632
29.6977	181.793	247.28
72.2693	228.558	183.493
86.8896	8.5811	116.671
21.2258	108.613	152.611
25.0329	71.9502	39.6454
30.6516	59.7023	258.324
68.5276	126.964	207.95
24.3599	90.2623	199.044
91.6137	243.089	40.8328
29.6167	298.962	109.483
26.9592	246.714	229.949
28.1354	84.0448	235.762
47.7421	215.956	52.3189
34.6501	14.1476	368.13
56.9163	176.763	88.9056
40.8693	92.7488	277.069
66.8179	87.5607	300.309
65.4758	131.491	265.249
6.07703	97.2961	146.395
12.3626	336.936	57.0876
64.659	101.356	171.206
25.4255	114.544	228.614
20.4428	53.1894	287.419
13.9127	114.074	169.886
31.0846	257.179	207.485
72.4819	103.33	293.681
14.7488	79.9042	14.389
30.7457	326.491	83.7569
40.3772	105.75	113.295
38.04	138.209	174.128
46.0732	99.9502	94.812
78.2319	312.378	284.628
67.5257	228.863	170.567
81.8541	155.649	91.1282
20.4347	59.5041	310.283
41.2507	112.161	115.036
94.3103	135.982	89.1815
62.7152	52.0431	164.323
21.4272	63.0901	194.281
21.2252	68.4737	96.2253
32.4378	84.8581	236.763
18.112	24.706	139.073
44.8965	125.849	362.372
29.059	96.4615	103.141
45.3548	140.453	133.39
68.627	84.752	25.0285
10.7501	91.55	140.014
39.568	57.5178	125.744
42.4404	120.922	65.7241
132.241	34.0655	57.5373
23.8977	209.986	213.332
27.9968	81.2171	328.44
128.432	140.159	27.4536
30.7347	89.7199	332.939
54.8588	85.6198	168.694
55.471	104.763	165.819
78.2921	113.743	329.246
58.062	121.86	82.2743
15.2654	75.3214	77.8786
24.6276	256.985	209.591
16.1917	11.4082	94.6495
55.0949	110.984	259.385
68.5775	112.89	155.502
62.7013	314.748	194.115
84.8192	200.906	78.2957
51.5981	34.759	102.51
46.0655	43.3017	289.781
81.4693	115.718	118.864
37.0429	269.408	93.4696
80.1414	19.7384	80.3301
21.5509	138.261	207.142
27.1678	263.226	217.163
21.7754	150.714	112.126
28.6901	4.11094	127.515
17.487	104.185	145.776
22.4421	33.8393	43.6414
44.7087	60.6749	122.532
35.514	110.158	30.372
82.0403	49.3443	86.3616
25.75	82.7798	136.187
25.2425	233.139	155.681
17.3709	49.7396	356.756
74.2442	58.1991	79.0637
69.1933	166.461	220.948
50.0026	89.7887	27.4351
68.3709	107.294	220.389
15.7394	147.931	258.541
23.338	61.1547	212.586
97.3845	76.7046	220.445
31.4686	87.955	3.64828
26.607	76.5498	173.021
50.7043	130.612	161.795
61.974	113.809	148.047
15.6889	90.4716	65.3672
20.9888	108.126	77.0475
41.6049	273.007	187.473
41.1584	49.0608	169.01
23.0423	102.552	149.022
22.8119	145.302	64.3784
75.0832	284.63	301.588
28.2013	89.0448	72.0453
12.1734	82.4216	94.9393
18.1814	43.921	377.829
5.23482	17.6223	67.7204
53.4287	427.61	385.553
76.9772	61.4424	150.079
21.5086	153.792	98.5925
2.58414	29.3807	41.3936
49.3613	83.8227	253.786
52.8173	190.853	44.8257
64.5317	130.862	217.177
22.3351	88.4489	166.247
70.1077	156.685	170.416
53.2931	95.5248	121.597
78.6826	127.285	118.211
49.3434	11.8673	119.717
96.6179	197.366	83.1698
105.648	215.901	104.941
46.837	126.713	63.5066
25.1133	57.9749	46.8392
49.3121	36.1108	99.8699
28.8337	78.675	46.5924
82.1393	86.0025	178.404
23.2614	347.208	235.945
7.61224	308.05	211.264
53.7591	287.842	100.441
50.0774	119.015	41.8859
0.277035	201.372	103.349
31.2434	134.534	71.8991
74.0425	66.8508	121.125
45.1054	301.548	220.781
36.328	130.381	137.889
47.2208	75.5517	115.234
51.1075	159.137	32.7709
17.0105	131.923	137.644
36.7903	130.883	198.782
37.6989	143.092	95.2844
37.036	22.0735	357.546
83.0738	89.7813	212.454
25.5741	82.3779	35.2046
10.2837	155.566	142.554
61.7354	98.6377	202.976
19.154	245.431	83.487
27.2139	29.6164	213.249
54.6115	78.4537	151.915
14.852	78.4466	110.194
19.4479	25.8295	290.583
50.6678	91.3576	60.0531
7.47687	101.592	128.787
46.5375	138.92	178.329
12.2996	46.3622	161.644
91.8482	173.582	111.457
32.6717	297.277	43.9184
52.0532	32.5982	161.31
33.3137	303.666	81.6195
62.9075	328.935	209.456
23.0147	65.9439	166.305
29.4033	76.6726	269.359
57.5385	118.166	243.769
26.0434	141.77	267.315
66.761	294.166	195.62
89.1055	211.666	35.2766
34.2388	178.423	144.83
85.5595	76.1818	233.713
44.4227	113.477	219.312
16.1602	145.221	113.843
39.3693	56.2721	135.72
72.6221	29.5231	22.7023
27.3011	93.722	84.6316
55.8556	59.9351	375.419
63.7274	80.1254	75.5212
63.776	75.9949	124.665
36.0993	72.2244	229.921
18.1842	133.568	136.391
28.5244	130.613	76.5691
62.2473	56.1104	139.416
38.5015	76.7755	148.644
37.7528	142.402	72.6785
14.3921	133.399	119.421
21.4472	76.7184	278.556
34.6193	62.4208	314.007
19.7872	85.2739	206.308
45.0499	63.8199	125.301
85.8091	87.5476	79.8304
12.902	57.7004	199.401
63.549	101.044	262.965
94.913	218.293	252.709
57.6664	34.7253	138.911
39.9199	82.4205	185.989
20.0249	135.132	407.736
25.1156	64.0507	85.3412
29.4128	102.007	259.308
15.0361	40.8144	266.501
29.5093	111.273	200.885
38.6824	47.773	21.8112
34.8224	86.476	147.443
64.5324	80.6544	53.4473
39.9302	118.352	164.035
30.8991	79.5853	86.3017
61.9352	22.1881	241.459
19.5687	55.0126	105.376
23.2517	129.743	50.9619
9.69815	91.9362	41.0677
85.0902	142.598	104.748
36.1713	49.5417	103.749
37.9746	394.529	100.593
3.79779	7.75784	16.861
21.8971	102.846	74.8912
67.905	33.1775	73.1574
25.6386	125.985	22.8822
42.0533	86.527	215.431
50.7473	69.8014	319.65
40.2044	146.288	153.89
64.7895	129.817	310.86
25.2016	62.1661	486.865
49.6417	59.5429	92.8725
47.8229	62.5867	94.4086
65.4092	72.388	96.0506
21.5165	88.1304	46.8885
30.5934	113.802	77.4358
30.064	113.815	86.7801
39.2903	165.933	20.8389
73.0672	35.3926	150.616
43.5842	101.442	133.264
59.6977	52.4386	34.0531
31.2891	85.374	125.655
27.5865	53.2237	142.193
24.7473	97.6095	195.179
37.3518	86.7639	111.592
37.502	115.189	93.5172
37.0569	35.7066	135.536
81.1939	207.402	156.365
68.6068	62.9918	256.775
16.6402	81.8223	179.605
70.0214	75.0687	133.189
24.8463	133.911	196.284
31.9327	103.476	234.874
84.4515	76.1429	146.598
23.0446	139.72	154.876
37.5585	42.7498	101.02
40.1325	79.3262	143.93
61.7507	108.471	135.942
106.607	147.264	90.4794
78.6343	99.242	74.2345
15.0361	35.1252	81.3524
33.8688	93.7607	157.95
13.1611	131.47	133.714
31.9019	50.8733	129.941
29.778	98.9552	302.238
71.6722	55.6117	192.035
33.2766	103.671	102.537
30.2799	122.431	91.5181
51.0275	33.7549	98.5379
30.1146	219.494	136.61
89.606	41.9943	85.8703
58.7965	72.7679	93.6269
18.3701	101.196	24.7956
48.3924	23.0186	249.067
48.9106	71.9997	194.619
78.7512	79.1624	461.454
19.5525	205.922	212.332
75.3222	70.8435	165.07
14.91	123.254	273.295
12.8282	172.033	285.098
64.2782	157.61	352.526
22.5917	73.2703	295.695
25.0849	79.0929	237.18
9.67847	321.089	43.1178
27.2488	61.3853	119.517
57.2907	81.4893	20.0126
19.5479	73.5844	222.348
42.2317	158.43	236.62
29.9562	218.975	29.4094
13.8227	133.33	87.876
57.1285	67.0054	60.5192
16.7999	83.8019	161.711
5.09743	120.239	143.133
45.3979	75.4384	188.856
67.3311	100.517	26.0417
81.752	25.6981	45.4823
22.7027	106.017	83.9881
15.4365	62.1716	72.5184
13.5473	64.4221	57.6662
62.8716	97.0585	305.948
48.7757	136.264	34.7403
13.5741	63.3102	123.353
86.0482	99.7649	103.924
18.868	92.8591	119.214
14.9743	103.019	285.925
29.9279	73.9945	223.142
29.9335	61.4641	181.894
31.8664	76.6563	47.3138
46.3239	58.2293	163.783
64.1415	85.6853	456.259
53.7371	126.687	318.316
85.9956	159.762	170.073
82.9755	92.8505	43.591
54.3676	116.188	169.003
59.0083	105.608	84.3315
47.8894	90.621	135.195
11.453	97.4819	121.334
22.8135	149.348	132.836
14.0112	70.6317	175.695
31.0357	87.7825	168.739
41.6729	94.4052	206.417
35.4843	81.6389	170.219
16.2206	131.159	94.7739
54.19	75.9604	82.4036
17.1161	188.007	225.093
16.5535	75.5742	292.275
49.2582	19.827	93.6825
19.9172	99.5432	248.338
52.4173	69.556	242.88
45.6804	77.5482	240.924
4.45975	129.226	153.525
71.4245	67.9158	412.361
51.8495	75.3197	94.1459
45.6566	133.885	148.537
37.7039	33.8042	104.982
107.208	63.9585	117.791
21.1834	39.7187	61.065
80.7834	59.639	50.5795
52.6528	121.818	120.545
53.1064	90.2992	191.664
81.9078	97.8446	374.745
11.2272	128.095	95.041
22.991	72.1848	117.995
40.2423	17.3963	170.18
69.5157	79.2623	40.5615
38.2508	64.4777	242.16
85.6913	67.5164	57.0079
70.7042	98.5711	86.9363
39.3322	84.9414	124.159
84.3258	94.1206	50.0563
50.7152	93.9636	91.2849
35.7593	78.3834	121.035
55.8065	119.848	40.2178
14.5114	98.9215	162.951
35.3152	221.692	379.701
42.9418	261.653	125.898
27.0661	112.737	64.4473
1.15798	106.61	121.472
64.2625	130.604	34.4153
82.2077	77.7498	248.907
31.8533	221.582	58.9933
17.2972	88.097	258.288
104.431	149.059	198.109
79.6153	59.9631	120.329
20.0243	88.8575	161.588
119.063	72.7522	237.648
91.5324	79.6444	313.163
66.1915	72.9102	163.518
11.7725	101.654	374.1
50.3222	113.739	226.476
15.5355	74.9944	139.329
30.6736	73.7366	114.758
71.5167	49.894	145.761
22.0768	60.7186	117.803
87.5073	83.8497	160.096
47.4764	91.6736	271.84
88.8122	51.1483	92.5858
17.4502	117.705	355.748
55.0863	47.1874	98.0315
21.1877	67.724	136.096
121.925	73.5996	224.081
56.921	154.184	103.317
36.9933	109.094	196.524
21.1921	97.0464	184.412
20.5031	55.7841	184.31
44.7029	29.4313	107.335
68.1697	104.475	88.1925
56.8399	243.072	201.529
20.1768	24.5403	278.51
57.6058	109.332	52.875
99.3661	89.8465	282.673
49.3252	115.655	135.096
86.4944	44.5463	98.1519
52.6856	36.1497	260.244
49.0955	92.7981	102.167
32.6428	70.6444	268.185
29.5728	73.6252	297.998
61.2455	119.552	194.612
24.5119	16.1746	59.6378
20.8819	82.1171	312.123
21.0423	131.65	97.0642
58.5324	50.4464	146.033
39.4418	123.962	138.811
61.3653	113.848	31.9528
9.67767	46.4512	128.251
36.4172	128.036	101.302
27.2909	128.952	55.4593
78.2405	60.9751	95.0764
26.4064	110.338	260.132
71.1001	170.533	282.832
37.0055	74.172	115.409
31.8923	77.6614	77.1766
70.3792	88.2079	66.2575
38.9492	113.949	159.751
26.4134	60.5526	82.1805
80.8598	150.19	44.2634
72.7223	77.8542	22.1892
35.5347	23.1857	271.79
57.8978	44.8179	344.331
41.0202	70.8917	158.144
50.7516	114.467	30.1406
36.0161	83.343	318.76
14.6034	102.317	151.652
20.2064	88.0363	152.732
27.4184	57.0188	199.778
58.917	88.3555	253.79
41.0825	88.9325	315.367
32.379	66.1473	307.944
26.0957	114.346	364.691
59.379	163.051	57.2808
19.2113	65.2497	204.569
68.3946	105.727	412.996
38.8097	81.1651	232.939
24.8085	69.7219	252.09
33.7115	58.4972	270.433
57.2792	140.795	479.692
22.9858	193.118	121.051
70.3445	46.6181	103.256
20.4355	220.355	26.6979
78.8549	150.746	253.706
71.0976	45.1883	327.099
39.3679	74.5595	268.555
22.4206	74.5544	88.7601
19.125	72.4884	323.746
13.2951	151.735	225.562
107.872	5.04478	199.994
106.693	144.995	159.395
66.4429	47.0215	71.3507
23.8528	45.3248	62.0408
27.8534	62.2315	184.034
59.4569	47.5883	110.832
85.848	37.2889	96.1294
50.3985	165.774	44.4839
81.5785	15.9057	190.215
18.3216	75.2292	154.954
62.845	26.7089	196.638
68.3996	13.4796	205.697
93.8121	11.2889	91.4452
53.2307	80.036	110.05
36.6246	81.1648	64.7634
95.1448	70.491	220.579
53.3043	130.35	271.38
104.673	73.1677	430.797
57.1026	123.041	27.8543
6.47807	66.184	278.038
53.9116	157.703	291.983
51.8515	63.998	152.204
73.1698	104.511	137.939
56.862	65.878	175.963
82.1662	159.98	170.392
101.326	39.2703	102.598
3.46664	145.624	92.6136
44.8248	49.7327	168.033
22.6093	129.356	148.429
28.7376	27.2777	202.204
71.5473	125.24	56.9113
89.9875	93.062	151.526
53.4007	80.6563	248.924
55.1961	51.9846	58.9787
72.5785	99.7096	111.285
13.8289	74.5309	131.916
43.4857	62.1816	87.4429
21.9314	141.869	212.667
58.1856	135.958	183.079
78.0862	36.0899	223.841
16.3659	242.41	212.039
45.8484	55.7552	271.837
48.7931	122.651	77.4482
31.26	62.3185	264.885
40.5504	140.751	48.8555
47.4863	105.905	164.275
88.9141	60.3632	73.8974
25.6871	95.0188	174.875
20.8613	79.9921	156.987
39.549	191.228	173.253
20.3465	71.7983	79.6752
23.8177	130.702	106.195
15.1835	80.8344	153.561
89.813	75.7952	48.956
87.8738	81.9533	156.681
28.173	93.4174	142.251
68.7914	170.063	181.378
77.5423	123.08	71.3721
53.7066	78.3806	93.9658
30.7841	91.9844	97.3125
23.6882	49.8585	72.8911
18.932	72.7966	10.9318
50.7573	98.732	45.6991
107.029	111.445	132.638
104.978	98.5422	55.7755
40.4953	86.3558	77.6443
12.5135	68.8211	140.643
47.5407	51.356	120.266
105.46	103.113	80.1462
26.6238	116.167	171.799
68.1801	397.081	197.028
109.378	6.2338	45.9107
11.1626	59.425	89.0561
54.7068	119.441	243.054
35.0888	68.0064	85.4784
40.841	44.5389	136.421
48.2078	75.458	193.578
47.6873	129.022	36.6174
35.0054	135.282	61.5015
48.2193	86.56	131.492
28.096	63.5716	352.332
64.0362	84.0215	304.558
16.7671	105.787	95.7661
28.3095	90.7939	147.87
29.8571	26.2302	185.658
16.1675	49.5769	96.1566
11.4814	97.8921	124.96
47.2694	120.669	124.26
78.1198	63.4623	16.5469
64.9427	70.0843	341.333
28.9693	135.613	152.951
105.836	87.9497	285.522
80.1968	133.195	130.468
64.7738	113.882	166.449
17.0165	37.3448	163.526
48.4412	68.4608	73.3186
88.2994	79.9875	208.986
5.25841	45.859	196.776
18.4352	79.398	402.938
15.1292	88.6034	266.677
67.2522	148.476	305.381
102.369	64.9369	31.7227
61.2732	141.47	164.183
106.576	83.7162	225.276
37.4127	54.0485	56.0414
18.2849	58.7391	120.51
83.9967	49.9797	213.544
73.9432	100.421	341.655
73.6047	38.2764	319.399
49.5094	119.728	255.433
56.8283	48.0633	197.374
38.8547	242.764	156.569
14.4585	121.545	143.464
3.98625	80.1287	124.986
9.71393	76.8406	173.358
52.1561	77.2265	357.838
49.1431	70.8032	177.645
11.6754	117.01	259.927
24.9661	76.5377	177.467
26.5892	143.382	237.541
51.4081	345.023	177.147
64.0127	51.6374	94.8364
3.61074	74.3645	85.1649
30.8865	82.6354	221.859
56.6136	105.784	120.668
72.4655	120.733	151.131
81.7444	87.695	26.7175
12.9182	66.3097	33.5666
36.7621	132.045	116.143
12.8864	77.5846	108.208
69.2915	62.717	94.8565
77.9156	54.2383	99.8244
61.5777	75.7188	301.015
52.0445	118.724	192.852
16.594	63.1515	28.251
19.8214	76.2259	204.888
29.4378	91.668	158.833
30.2916	25.2497	295.829
41.223	75.7442	203.067
85.8029	84.5675	215.096
67.2813	62.0238	198.831
50.5068	111.038	99.7479
36.4046	75.6817	114.949
27.2435	47.8147	273.713
47.3901	94.3087	146.636
57.1653	52.1414	128.726
30.4945	102.29	104.338
56.9619	65.1032	303.805
90.0052	85.5944	159.212
25.966	41.6078	292.318
23.5881	98.4338	227.03
58.1742	56.1019	297.123
23.1662	86.1775	70.3659
11.8161	144.038	80.4943
59.0584	96.6646	112.381
29.6058	63.2413	140.882
77.6449	40.2531	61.9662
91.5583	124.069	146.232
38.7566	148.775	118.678
31.797	73.9727	131.876
30.0238	101.852	184.467
29.735	112.253	190.029
41.3842	29.5476	39.9931
68.1693	124.929	84.2091
4.6831	81.8275	160.103
20.5074	75.5453	312.505
74.0271	12.8042	171.228
39.3823	81.7609	82.0745
99.5957	18.6933	203.964
20.1572	21.5103	134.914
45.5913	79.6683	290.333
44.334	166.874	98.254
31.0498	80.8266	38.0267
41.7429	117.078	99.8406
25.6487	79.8381	307.403
13.5309	105.135	59.3699
38.1184	157.473	41.1908
18.4406	126.887	105.333
20.1121	43.5309	269.279
38.5541	111.025	75.2243
6.21152	54.0834	272.294
88.6095	175.49	211.791
41.4064	56.0111	165.218
28.2986	72.9118	143.91
88.2175	51.8823	69.4903
30.0178	127.931	163.382
42.3689	142.868	145.066
65.5223	25.6894	110.785
15.5214	168.882	304.201
32.3614	50.718	112.707
68.9246	71.3969	66.1513
25.2187	72.6504	200.091
72.6855	80.7385	162.136
43.9441	112.705	197.6
95.5589	96.0214	141.02
61.8762	82.1793	358.576
83.8173	35.8812	160.407
95.175	116.808	74.4901
29.4531	78.5493	161.18
27.3039	84.2739	107.27
55.5296	57.7117	101.271
54.7509	60.725	114.706
15.5837	143.36	202.5
25.4646	30.207	160.363
51.2088	59.3098	199.797
21.5586	89.2164	112.85
33.0174	63.0484	164.417
17.8514	55.1663	308.004
22.7877	91.7083	121.665
20.7922	58.2125	30.2054
59.7794	105.757	169.086
32.7162	73.9107	161.901
77.1227	83.0918	54.5627
24.088	98.5315	224.453
58.999	73.505	124.853
109.153	62.4725	194.973
67.9611	70.5568	187.362
89.0287	38.0092	174.716
75.4444	160.603	128.245
39.6163	34.0891	309.317
29.876	111.324	105.811
32.5823	56.6107	293.958
101.456	122.598	323.129
62.9112	42.2151	137.499
89.4257	104.91	133.169
88.0532	136.054	307.258
40.8384	75.7065	219.113
93.9191	49.6603	92.5118
63.838	69.1394	135.301
54.728	141.588	66.7414
24.8499	50.1	17.366
38.5245	129.821	50.3662
55.0315	76.3258	241.534
40.8556	113.021	215.101
44.6249	97.5962	446.589
50.8696	107.004	134.33
69.3988	105.945	96.2588
5.82409	86.051	51.2234
11.6816	44.2968	42.6557
40.5188	45.673	104.336
20.6995	53.875	430.228
23.4212	39.3994	359.904
73.7918	92.6292	98.5515
13.1324	89.42	283.5
40.4492	91.2169	154.869
8.44982	31.0441	255.521
12.7407	102.221	121.682
72.1994	99.7053	293.342
59.1356	83.8792	352.154
44.033	59.9058	99.727
63.7213	74.2903	222.447
127.15	123.369	28.3184
24.8897	80.5385	314.601
77.2427	78.5465	96.8511
26.5381	94.3469	42.6079
51.014	26.6335	42.2757
30.5513	121.54	63.8079
29.7309	83.3407	103.3
79.7762	117.103	169.083
25.8848	61.4583	280.301
35.6741	35.806	51.6348
62.3258	55.6531	122.403
34.3181	75.8053	173.488
77.9421	108.401	121.709
39.0554	76.2745	84.4201
55.1259	80.1584	291.388
32.2986	145.997	221.379
31.8222	90.0199	115.595
31.8685	93.8263	220.553
61.0166	70.6936	88.3205
40.8462	179.508	158.881
2.94535	46.58	291.833
23.7518	112.555	29.7098
51.6052	56.7025	282.933
72.2951	75.5598	139.203
76.7314	68.2686	92.5799
54.2062	135.663	122.301
20.8949	144.738	73.2205
30.0989	55.0219	192.648
77.1582	114.59	332.597
41.4018	91.5566	382.786
34.717	94.3049	213.042
72.6347	96.2336	140.243
64.3248	130.752	168.785
56.1425	37.5924	236.929
14.5813	69.6237	240.139
12.3284	98.4152	158.768
76.1301	146.873	264.192
21.8357	97.9517	138.531
31.1207	82.9755	168.6
35.6572	109.783	196.503
34.1384	56.4687	363.959
60.422	101.533	168.903
52.6932	348.394	372.603
38.7796	111.075	46.2666
23.4598	201.159	212.645
38.4429	92.6794	488.955
12.6227	207.238	119.617
27.554	52.9416	57.0094
39.2536	98.0226	379.916
67.1294	102.878	184.735
28.4138	41.6307	44.6384
24.0804	99.4037	91.9234
19.3033	83.5947	210.807
25.1643	80.5857	268.033
40.5733	124.843	126.465
18.5033	67.3565	101.912
45.5301	94.5414	91.8696
23.7109	195.151	237.469
37.6493	72.5653	111.898
92.0476	164.024	328.29
64.0894	64.6553	121.709
30.8049	59.1619	135.456
45.3029	46.8216	89.3686
13.3965	128.556	128.479
14.3368	81.1198	116.719
14.9078	114.943	51.623
44.9352	91.632	92.5243
63.8808	50.025	135.649
30.5625	80.3133	166.05
27.5065	72.0644	202.554
17.5059	240.005	56.3232
44.7603	51.0742	69.1889
67.3395	73.5395	142.663
93.7154	78.8165	41.4371
55.155	144.829	108.742
72.4789	61.7051	48.7451
45.3409	33.4616	85.5233
25.5345	112.835	152.055
57.0115	73.6271	94.1622
78.4993	41.367	149.497
57.6291	106.421	15.602
47.0086	78.3465	64.7414
25.9853	148.127	61.1986
43.1734	54.457	215.219
62.7274	42.9814	101.707
68.6329	111.396	50.3455
47.4426	42.7776	10.3714
22.3582	76.6235	88.1061
18.2113	75.686	149.642
69.6954	77.3947	60.5755
58.7483	42.6558	74.0564
94.3586	55.3025	37.8559
26.5079	130.544	122.795
3.52572	63.9348	53.6278
24.611	89.2337	106.442
73.4079	70.6736	75.5364
59.9903	87.7978	88.3905
108.945	81.9162	64.6692
67.3461	397.979	231.521
67.7642	48.8313	153.508
21.8547	26.778	113.473
94.6934	72.8235	231.927
39.9645	51.5615	114.706
29.924	124.869	128.125
97.2473	62.2154	85.4822
38.4907	100.666	88.5801
50.611	167.439	204.876
48.9561	21.1531	148.822
52.2077	194.561	347.511
31.4439	145.658	233.727
38.9986	132.951	69.2712
37.6633	112.816	403.47
41.5003	76.7609	125.527
75.1522	88.1482	252.028
73.4772	95.4365	193.338
47.1501	47.3717	82.9284
47.2575	24.7656	250.852
50.8424	117.373	256.081
55.6603	39.776	59.5859
22.6824	66.3482	200.727
20.8528	27.9603	165.253
108.273	79.8588	277.077
51.4871	63.7773	173.159
7.69851	96.3583	30.113
30.8283	105.337	71.5853
20.9398	92.4777	161.204
20.9862	67.359	123.498
72.9984	59.9973	294.945
52.3246	106.979	100.557
33.6143	121.867	190.438
31.3454	103.356	284.935
22.6867	95.7908	45.2603
49.2261	127.539	134.916
51.7316	93.9895	201.868
35.5118	107.914	126.347
26.4681	129.75	127.589
52.6889	10.4987	235.419
89.2237	76.4565	128.268
24.6437	143.122	233.488
20.7658	64.6774	387.791
52.2075	82.8899	402.681
30.3473	79.4268	98.2823
29.0296	78.5917	119.769
24.1756	73.0181	46.6289
20.487	48.3963	46.1249
48.3092	107.301	197.927
76.5655	42.457	10.7042
98.5443	103.103	57.2431
70.5094	95.3627	117.65
44.7822	86.9436	32.7345
29.8408	82.5609	142.139
58.2733	186.647	314.923
72.8675	117.469	163.775
37.9089	48.761	306.24
31.7498	58.1404	308.304
49.5636	149.998	210.731
60.8419	97.7545	106.505
69.6578	207.251	28.0025
61.9245	62.4706	47.269
42.7771	43.0692	80.9613
21.2816	83.4563	172.643
60.3434	136.009	180.097
29.7938	163.141	52.3247
48.9626	61.6768	333.261
62.7246	85.3885	84.4174
24.9251	72.3712	182.957
42.3883	91.3991	369.996
58.4875	102.834	146.834
20.769	67.1553	124.819
50.5107	111.816	36.3941
52.435	82.8064	176.219
51.3697	73.7179	232.282
87.3912	93.5447	77.324
79.9462	103.104	54.4905
68.8686	63.5122	168.819
41.9623	47.5084	70.7046
37.6889	55.9425	267.282
58.4495	144.634	397.689
30.271	108.916	94.4623
66.1319	53.3101	137.322
24.5973	133.532	125.604
20.797	19.9209	71.765
26.2737	149.184	208.907
3.52136	102.623	110.744
10.8925	159.859	147.714
22.5118	59.6376	296.415
89.9953	45.4432	145.719
89.9413	55.2794	182.839
49.726	91.5455	99.0064
36.7018	69.9681	139.29
20.931	84.3741	96.5431
63.6144	109.714	201.594
75.5335	140.305	61.1747
78.7864	59.2816	105.584
33.8988	65.9461	56.9136
5.72341	120.037	171.169
33.1749	77.9699	372.573
95.5036	62.4547	72.6477
22.2177	23.5566	131.057
39.1119	71.2493	56.7019
30.6272	98.1582	95.6632
37.5424	73.3408	148.231
65.9271	63.6622	86.5892
33.2158	104.504	41.1165
30.8979	54.8631	319.184
30.3415	103.113	362.246
66.1711	111.744	111.767
32.2192	86.5459	185.294
42.4008	218.514	133.419
86.7983	43.0172	233.562
40.1132	108.795	179.742
44.6995	244.968	108.881
70.3877	35.1954	76.8032
53.3461	63.5053	132.526
68.5548	32.6675	217.192
59.008	101.13	197.043
49.5102	96.117	230.307
2.58397	63.2154	139.144
42.7199	42.8703	174.161
36.957	79.2081	226.275
60.4684	111.576	87.8003
58.3826	339.299	82.0893
60.8352	30.8765	159.567
58.7462	94.5377	357.408
17.1049	109.948	165.885
72.3082	87.6482	60.2159
89.6852	346.003	43.0204
76.0767	83.1487	246.933
27.5374	166.534	50.5514
34.1584	30.4393	55.119
27.2394	84.3039	66.2036
22.48	90.1977	157.593
22.4588	119.045	139.311
18.6307	151.558	82.3608
54.7122	39.0912	134.151
33.4864	78.0182	77.5526
58.3697	34.1412	233.59
15.4656	74.8518	146.89
14.0642	82.4628	100.207
27.2948	136.31	144.111
79.133	40.0852	315.394
10.3499	28.4893	190.34
65.7884	104.383	164.426
47.2608	118.861	225.79
72.2655	116.058	108.982
24.1461	92.7843	382.253
55.7626	66.7919	219.574
31.7242	126.763	259.13
80.7014	58.5062	131.115
28.4166	67.7107	128.39
43.6787	84.6465	280.2
69.6168	71.5468	216.04
34.5424	78.4399	169.394
97.0871	38.3723	178.294
33.8103	55.7896	241.092
38.002	138.43	149.992
54.0232	351.707	200.276
27.8368	149.008	314.093
76.1693	90.4541	40.6842
57.2478	98.101	140.661
47.8907	81.1133	287.231
24.885	75.0751	372.449
23.9847	104.489	129.2
59.466	3.9696	433.594
81.4644	77.3158	216.976
100.182	184.557	230.654
78.4138	55.742	226.714
58.09	152.98	260.351
47.6185	187.591	73.7834
58.1025	64.9916	287.359
91.0774	51.2984	258.026
28.5712	32.113	227.782
18.4432	92.4231	206.411
55.0296	172.129	152.301
91.8324	128.71	70.2223
55.7685	73.7103	26.7654
33.3479	124.421	371.418
63.0881	52.5708	287.11
17.1107	95.0083	93.4125
52.039	203.64	161.421
31.3466	59.0638	59.0052
41.4504	68.8212	190.273
46.8292	81.2875	234.184
25.0139	71.115	56.5232
72.8828	51.6918	65.6572
49.469	85.583	80.5948
65.2329	127.415	116.606
70.9867	88.0492	32.2834
75.173	33.4139	250.03
56.2314	86.5086	166.656
46.39	60.0327	190.042
74.8935	152.92	130.833
60.8962	84.5939	240.976
29.2153	109.743	306.802
89.3606	134.514	450.723
73.8351	83.1952	134.46
51.2323	99.7987	53.0985
88.7107	39.1045	218.101
16.7284	14.9434	236.64
30.6843	86.1898	62.3588
60.6457	44.753	49.3896
11.477	55.9166	184.671
28.6136	58.7278	192.137
54.0195	71.8036	51.1046
54.5748	101.726	274.305
57.4957	115.139	51.8637
96.6174	88.4031	279.136
20.2692	34.1733	47.5692
62.8412	116.039	197.924
25.6026	69.5584	190.401
46.3418	133.53	100.11
21.1117	71.5913	113.921
65.3163	31.5374	82.305
87.443	107.845	407.49
27.563	60.1977	199.451
41.372	74.1718	114.406
38.965	106.125	191.349
28.4356	117.943	113.972
25.7406	117.708	84.9742
68.1291	50.8245	492.468
3.97246	63.6212	189.027
69.2563	121.982	148.69
29.9374	33.8974	82.0532
88.8588	29.6951	131.759
47.3445	64.3558	355.094
52.1857	122.785	83.7369
88.664	51.4636	310.783
65.9971	189.71	234.396
21.5656	97.6713	182.057
2.88551	57.7508	378.442
15.2236	166.403	64.0242
39.0395	58.7777	162.994
25.6202	124.648	179.62
33.9481	80.2619	67.9505
14.1854	91.5413	73.5028
57.1729	83.7127	175.954
17.5166	87.2817	118.107
64.6411	81.0371	143.578
24.7072	64.1458	150.143
26.5894	59.7625	61.1889
9.76029	170.474	59.3616
74.3671	67.1669	209.15
32.0942	107.06	482.562
37.206	306.851	51.1745
79.8927	104.149	409.522
58.8857	22.4859	334.993
17.2182	75.2931	173.46
73.1355	76.6395	259.148
70.1453	61.2105	70.6077
95.2836	109.698	83.8031
49.6278	15.0149	251.815
28.951	80.2894	95.4079
31.7915	38.9569	104.594
40.1562	130.471	127.656
56.1169	119.34	294.644
61.8173	118.447	133.078
88.9164	80.1969	154.499
57.389	26.8152	411.59
19.2929	26.8149	333.439
14.2498	113.047	163.165
19.8689	66.8424	124.51
30.1626	139.848	186.755
51.9567	113.065	208.928
32.3274	143.733	188.211
62.4451	21.4545	199.707
48.8997	34.4979	355.055
39.7609	81.6041	94.1993
77.7773	108.379	261.557
64.4802	76.0797	155.708
65.928	107.723	83.8247
56.8366	211.289	73.8995
65.1893	38.4874	185.163
16.9041	84.2239	328.274
61.3389	93.5087	216.719
45.439	93.4638	94.0952
58.2433	71.8178	84.6468
73.2054	130.411	122.422
42.5513	92.7256	361.11
16.0483	69.306	89.9086
18.6361	108.296	206.568
95.8064	86.3023	182.842
80.3602	56.2765	140.074
54.0551	67.2013	116.312
25.0668	144.55	189.396
62.1486	62.7197	22.5244
41.5969	58.7765	35.5592
71.3057	72.3278	67.8364
28.312	246.381	102.029
39.9388	82.5919	239.274
5.91696	114.262	73.9776
30.3817	49.3701	185.894
35.1726	169.944	62.436
52.2971	44.3008	204.129
24.3575	70.3934	131.05
36.473	153.806	140.751
31.6735	143.701	285.076
25.374	78.9068	277.103
18.4942	90.348	185.21
14.0573	73.7609	304.746
36.5822	70.6895	72.9069
25.2725	33.8351	211.501
28.3862	73.3711	34.1267
43.2855	151.619	172.173
67.3612	59.0883	99.8391
23.825	68.6402	114.161
72.4482	86.7768	161.635
24.951	132.967	85.6901
63.7491	160.934	102.793
95.885	205.386	247.422
41.0874	187.504	358.5
26.1165	246.014	148.128
61.2799	94.5518	31.6599
37.547	23.9525	186.686
41.1921	21.2431	50.9431
72.111	91.7746	256.714
25.3436	289.87	203.329
83.189	177.018	221.053
85.4701	64.338	97.9832
83.8019	106.827	206.148
87.442	82.5162	151.131
35.4236	34.9885	220.669
43.3184	74.0186	239.395
3.71704	94.0477	141.101
22.9672	58.8581	285.412
41.72	52.0147	100.934
39.3816	122.234	258.494
76.2394	96.6168	111.904
42.8994	10.921	93.9127
25.2898	110.903	128.147
43.052	25.638	253.851
51.8306	80.2962	397.821
26.1976	64.2427	184.658
32.2086	34.0335	111.479
31.902	73.9254	143.332
45.6202	94.4542	101.485
31.0496	95.6822	217.804
58.839	54.6772	273.27
22.4878	94.3626	208.72
37.19	103.282	7.21619
24.1201	83.0102	39.0966
54.5934	85.5197	128.597
65.143	101.844	116.574
57.1687	27.5721	133.936
58.0699	101.619	8.27419
54.3736	42.6539	350.698
14.1264	87.0885	133.879
3.80569	42.6686	215.332
23.4515	130.84	143.309
50.065	80.6179	186.411
8.90731	65.5535	52.8006
28.6851	108.134	194.061
74.3449	111.367	177.527
41.9596	67.862	237.909
2.76658	66.9134	171.231
21.3232	147.531	179.768
45.6978	64.6257	196.606
32.2301	67.8191	95.0869
60.5395	153.251	139.632
46.8922	35.2979	25.5219
54.2592	70.706	82.3368
35.6161	136.718	73.3517
34.0661	34.1378	196.423
63.993	107.135	230.308
32.2281	35.4777	183.385
53.1883	75.3456	174.357
63.2514	170.155	44.7157
26.5001	147.713	139.298
51.0265	218.995	126.681
70.8682	78.3866	33.1458
21.7112	111.802	283.669
35.1643	15.253	165.96
50.1538	69.353	187.588
90.0471	60.0388	81.1192
59.1207	93.5922	157.614
7.91474	154.495	321.836
55.0323	170.507	94.1333
102.311	42.3522	113.96
15.2296	63.6712	160.042
17.316	121.887	101.437
81.1193	140.707	80.8293
78.3132	92.0067	51.6469
49.2139	63.6685	212.014
31.357	35.4636	130.659
31.7687	109.4	112.745
51.553	99.752	63.9291
29.1944	111.146	166.557
83.5187	62.4336	32.2269
88.6946	136.418	190.177
60.6659	27.8239	84.3285
48.344	106.03	36.7452
17.7558	88.9806	209.542
64.0834	76.6473	101.891
11.4359	85.7654	192.327
22.59	87.5813	97.2776
29.8242	136.603	83.6102
45.8486	46.4738	322.567
71.7819	75.4742	249.198
61.9155	75.5216	248.502
12.6619	99.4871	263.071
32.5616	110.107	362.254
46.9394	185.001	228.647
52.8544	91.0439	107.892
107.993	108.833	69.6374
33.674	155.552	138.82
26.5539	80.5318	156.814
52.5459	133.026	85.4647
70.1048	82.7256	157.617
17.2972	102.374	155.997
22.9002	65.9124	218.436
83.8232	13.9514	251.507
66.296	92.1244	70.4369
30.1919	89.8427	111.473
51.5011	115.662	166.567
21.3249	93.2623	174.504
44.9772	22.9008	56.6802
50.7654	86.7548	67.2628
37.5238	67.4307	117.575
39.6056	66.67	308.295
63.8011	92.4402	267.517
39.4769	82.9015	216.258
12.6228	226.981	204.75
61.9409	53.005	358.128
75.9335	72.8524	46.3376
24.3069	256.666	196.212
17.6793	298.836	129.836
83.4897	93.3285	324.532
77.5482	86.2499	314.973
27.0683	78.247	70.2345
58.7695	141.367	78.1037
42.1781	185.437	40.356
9.26001	74.3346	98.9084
56.7991	122.425	82.9878
51.3134	52.2916	38.2779
32.299	85.8281	234.1
22.8668	104.971	199.887
101.67	101.762	292.408
51.7327	175.15	198.167
52.2872	62.0208	156.547
75.8341	28.8313	328.789
41.2941	68.267	402.928
34.7387	85.308	76.9299
102.405	132.991	110.473
74.8519	85.172	266.21
36.6636	69.4042	145.985
37.5484	86.7215	145.614
51.4615	295.231	71.19
7.48916	158.504	66.3594
115.574	80.5182	90.6493
25.3867	85.003	243.022
37.05	102.537	398.731
22.6884	74.1019	192.746
52.2615	60.5299	294.835
15.898	296.122	86.3776
70.6121	48.2208	321.623
17.5959	96.781	44.0804
35.7234	239.277	104.146
34.1535	111.345	378.767
72.0969	1.13092	46.1461
60.7141	29.576	135.013
138.956	105.061	71.3825
112.768	44.6351	125.63
55.2456	66.603	25.6673
52.5756	123.687	59.4017
38.933	91.2985	61.7378
66.835	104.49	106.841
60.5648	107.186	177.858
24.5649	75.8742	110.83
57.0548	5.99214	166.563
27.8504	157.641	191.438
16.9485	93.7615	150.326
38.1298	126.805	82.4405
13.1423	105.348	30.0014
4.17128	69.4433	18.7478
57.1887	150.911	175.885
30.1834	52.7495	128.964
28.3004	76.2057	480.303
25.071	59.7828	237.346
60.8462	134.932	307.269
47.3016	45.7187	147.372
63.7856	73.1556	229.137
68.6029	54.99	142.067
75.1624	63.1997	255.642
29.0198	75.66	150.091
103.521	115.861	203.692
34.0913	128.349	79.8008
36.7556	142.212	167.118
52.6047	67.6901	181.425
48.2872	106.335	53.0488
40.2202	138.028	279.81
48.776	23.2382	41.6572
58.3455	104.512	213.171
47.6832	30.1216	90.9934
35.4295	48.5717	85.4332
8.98314	87.0397	135.617
27.9674	53.2062	95.837
66.7337	138.75	79.5086
67.5651	117.869	94.0438
66.7262	99.1931	255.418
96.3739	72.9288	294.314
42.1906	105.048	200.808
10.7454	130.156	261.239
59.025	68.4103	112.483
76.0713	73.5441	211.796
48.2963	148.792	208.35
37.7605	76.6322	329.475
49.957	60.8941	97.6163
46.7453	120.658	53.2139
41.5858	118.572	136.424
66.9582	68.0294	128.844
32.3781	90.2785	56.7846
50.2556	72.5059	314.56
65.8523	86.9918	120.806
30.9849	89.1176	196.394
55.0596	70.2554	186.735
45.8368	105.09	105.728
31.176	293.771	132.209
19.577	83.7262	373.057
78.8251	207.141	177.312
18.831	135.844	35.632
27.3137	149.784	68.8408
67.0079	240.149	67.6771
24.6444	96.0545	209.107
81.5176	152.211	6.48326
21.2093	42.9803	101.058
111.646	76.082	291.057
67.56	176.231	170.887
84.4812	276.926	363.534
18.5959	106.233	43.549
17.0875	95.0328	106.49
9.93079	59.0834	260.355
7.18915	56.7757	333.342
66.2889	50.7348	103.881
68.203	111.369	399.173
69.5177	100.295	43.6827
44.6761	106.044	209.153
27.6296	75.6219	143.844
12.5168	110.576	166.818
92.6522	67.2114	124.497
42.9624	146.324	1.23249
29.7473	84.4805	190.282
36.0143	30.6875	58.5784
18.1995	133.227	89.6484
21.0636	19.129	178.671
62.6479	44.0885	194.113
149.418	67.5222	144.852
83.8114	152.72	127.006
57.3509	152.939	81.7583
93.2856	58.8317	78.2715
98.9325	29.3613	63.9695
33.8215	56.3508	180.722
38.6549	42.7173	63.5954
39.5797	125.42	465.513
43.723	75.5563	217.357
63.2482	100.045	20.778
19.833	22.245	31.7982
72.4444	108.919	244.846
69.5074	98.7495	401.827
25.7091	119.615	312.006
83.5175	81.5842	125.404
55.0135	105.114	91.5069
29.9839	80.4831	110.434
63.3708	41.0971	141.415
73.4478	78.6201	52.618
38.878	109.008	138.222
50.2899	82.7327	98.4735
4.89955	97.3544	78.0077
66.6072	52.0864	342.976
39.5578	146.2	203.323
31.4659	61.856	168.688
86.0366	63.0265	159.806
15.8266	60.985	266.801
36.6057	115.301	227.495
29.7455	136.808	142.015
40.3655	55.3016	174.691
41.0935	118.211	142.635
67.7635	175.778	116.004
41.9394	23.2316	148.247
5.76307	72.6057	68.0947
24.2715	46.6949	84.8626
61.4534	70.9564	180.955
43.1763	140.379	128.005
51.6252	101.307	221.806
20.9154	32.8026	175.89
31.2216	73.8226	301.793
34.8242	91.1017	77.8468
49.3559	72.4847	250.288
22.0031	33.9342	120.606
76.7038	101.223	64.3127
14.8832	117.038	79.3169
88.7443	53.6371	140.302
74.2579	57.3713	86.7102
31.7037	71.2482	51.3786
51.9952	45.5361	45.4766
18.1318	106.776	72.4916
12.8321	34.5665	38.4698
28.3016	124.578	162.272
77.5022	63.3694	124.804
51.2864	94.3409	98.037
74.9237	61.0189	126.35
49.443	79.5811	79.0127
72.9946	98.9675	127.666
66.6998	3.94095	94.9093
37.9594	162.918	61.2056
39.1643	79.9852	109.264
22.3028	84.1213	254.459
30.2734	122.126	51.8822
21.3292	86.4859	60.7171
77.5981	89.1575	267.914
31.9066	45.5576	148.784
35.8077	88.6973	341.77
54.8174	70.6513	90.9065
57.3236	62.5	171.172
6.09025	54.0287	255.338
23.7071	118.934	81.3465
87.1211	76.3248	157.539
50.3274	63.0892	46.8493
9.94997	80.9568	174.769
24.7842	129.225	115.277
31.7103	59.0563	285.753
62.4913	75.1051	47.9073
27.8138	74.1576	112.949
26.0231	63.9552	161.04
48.9952	119.67	208.805
79.3098	81.3537	133.929
40.503	115.917	287.856
15.0575	9.65437	196.095
11.9485	150.701	368.7
40.531	24.9956	143.331
39.421	130.661	249.447
21.4765	95.6736	295.129
34.6408	58.8615	333.776
32.3185	93.7013	270.165
52.9084	58.262	248.359
60.4728	94.075	84.2673
21.5246	112.345	227.268
36.9201	95.9574	227.394
10.8892	130.503	306.437
79.2779	129.305	73.4867
17.0142	36.0714	220.101
87.6019	167.378	44.3621
57.588	135.015	50.7451
20.4628	161.488	177.67
19.6338	31.464	162.577
66.8012	135.484	191.468
38.8408	69.8005	30.3464
36.7048	118.509	250.268
45.2893	105.18	282.215
40.2317	30.1438	163.202
30.135	246.843	241.647
11.7734	169.606	162.023
39.1239	49.2599	278.095
58.8933	79.0522	306.391
23.0456	129.455	197.019
89.3689	71.8257	191.418
24.367	91.9404	432.818
26.4186	112.284	329.578
64.2656	100.664	209.336
8.64652	55.3071	112.345
60.748	19.9263	106.569
69.5277	124.031	59.283
75.7127	51.1439	167.133
74.3884	53.5796	332.38
12.8284	81.5541	125.995
39.4612	107.162	45.9515
57.0227	129.354	145.878
24.6553	94.0078	202.579
28.6224	74.7527	236.545
30.0718	42.751	136.185
39.7608	58.0082	53.6226
80.8578	94.2398	108.961
39.4445	114.893	61.4236
72.7867	93.9539	295.456
53.0134	94.9446	165.919
84.7937	148.232	121.974
96.9821	74.1903	150.889
61.4912	71.1324	122.19
51.3526	84.1655	143.134
29.8263	45.0185	227.894
16.607	101.814	87.3
19.38	72.4589	262.196
83.754	101.094	248.807
51.3397	76.4544	241.84
57.5176	81.3623	95.3295
91.45	310.012	219.915
67.7397	33.5435	486.129
14.6357	94.0902	370.297
13.1211	111.459	52.98
28.8275	64.8002	301.788
10.5654	58.8394	290.986
28.0004	119.11	54.9248
21.1366	71.9371	153.859
37.0513	80.1071	45.1637
32.2251	124.969	89.71
34.9434	24.6423	155.504
9.3022	71.5379	112.243
13.9404	108.911	284.013
85.4407	37.4451	144.125
55.1349	118.203	218.234
57.8436	65.1805	152.815
52.0214	89.9411	94.8993
13.0691	98.7278	329.619
25.144	45.1662	10.7056
13.5398	172.804	176.823
32.0076	306.025	170.037
66.0699	95.088	42.3178
68.8472	84.0332	41.7875
40.3832	139.727	92.8958
39.1408	48.6579	94.3837
62.289	25.5528	169.226
67.5438	73.5308	68.5414
23.6216	59.4033	193.31
12.2856	28.7148	98.4491
60.8859	156.897	33.7081
35.9322	112.99	140.638
55.0616	26.6508	181.717
24.3914	111.667	133.281
26.8951	49.0333	406.227
19.0138	54.6104	276.557
12.399	55.5976	100.437
27.3308	118.779	90.2574
26.0168	73.9326	67.468
43.4041	133.082	58.0079
42.6002	270.864	212.107
28.9856	43.1206	281.915
66.2431	102.53	151.639
18.0493	21.6617	56.3415
73.7472	61.0822	148.771
45.3513	86.7519	14.4372
77.9397	93.5996	109.527
22.7009	40.6841	74.9969
56.4537	77.3294	106.223
56.9115	94.0412	170.127
48.529	125.204	106.697
18.8809	61.4763	30.4589
45.0687	69.9736	87.2624
29.2481	28.302	111.877
74.6415	55.7054	181.476
58.6631	73.1094	57.8946
24.5588	81.2589	151.659
74.7496	29.5195	124.143
16.046	71.5822	237.431
18.7212	68.0537	158.214
25.7246	107.591	178.404
29.31	36.5414	225.049
33.0055	101.381	99.7914
9.21484	23.2126	93.7811
15.8563	57.9174	235.425
51.9104	53.0164	124.303
53.9005	80.7383	249.122
49.5368	94.4	72.4747
19.0082	61.1282	207.548
13.9794	157	140.589
53.7461	75.6961	184.766
25.9701	120.942	127.617
71.2212	84.9391	132.575
70.6062	96.9296	148.933
69.7849	65.1226	234.863
15.582	37.3084	234.569
11.3563	107.401	71.4964
47.5949	33.576	255.662
11.1649	369.264	306.419
48.8488	121.066	355.424
50.9462	38.9032	152.74
66.6584	44.4127	221.408
94.4835	19.5268	160.125
40.0689	60.4397	22.2746
62.9761	65.4891	270.406
64.6965	16.852	81.0754
25.7923	112.933	95.2432
25.4666	82.361	86.6294
42.253	48.9384	181.654
79.1416	120.413	232.915
140.814	136.929	260.322
98.245	103.222	259.315
47.4797	108.504	122.846
18.8917	18.3057	47.8991
36.0228	71.9385	186.168
43.2889	53.96	170.17
46.9532	113.815	216.174
66.9192	151.549	138.703
10.9429	40.415	98.3588
28.9758	110.797	76.4884
23.3854	80.1824	155.911
21.5473	155.925	135.068
91.9332	85.7027	94.9951
72.632	104.43	20.2177
40.22	65.7155	310.048
68.6037	27.5644	64.7276
36.1525	68.2956	83.0016
33.6887	76.7041	104.712
21.6413	130.115	143.491
67.0982	15.0417	58.5846
47.9534	301.354	215.232
67.9066	68.7904	202.601
31.3516	131.023	276.462
19.0911	65.5858	86.2287
29.3863	71.6402	46.7322
40.6742	86.236	73.2106
18.8919	42.1716	136.597
37.0195	78.0662	161.86
91.2134	100.856	399.697
54.0588	117.565	99.6561
38.8174	133.443	256.139
58.5699	122.919	266.62
32.0342	165.424	75.5187
35.552	79.2026	267.066
12.342	74.222	88.3392
67.0459	120.13	16.3298
13.635	50.466	129.692
31.2034	74.6499	173.369
57.8269	70.4858	196.271
40.2642	127.168	47.9333
62.1938	25.1014	131.218
45.5621	132.26	23.0333
39.7202	69.8097	400.726
32.0604	126.697	139.018
19.7522	57.1772	293.83
53.1399	364.595	99.7699
72.0535	101.119	76.8484
43.3938	76.356	183.25
59.9767	190.819	232.403
34.9643	104.716	232.971
27.5915	180.862	183.67
53.4114	101.658	385.615
83.5042	65.6525	100.925
85.7133	126.898	126.012
21.8658	207.919	178.78
60.4142	94.1722	127.038
45.1579	21.1399	244.165
52.839	127.878	143.084
69.2901	26.2133	274.328
33.8022	83.6943	145.57
45.9389	143.329	115.636
41.7714	133.649	86.2353
35.6864	212.782	134.509
38.2676	102.4	56.3239
104.38	63.2473	107.332
22.71	103.11	294.801
20.8435	67.6675	284.044
47.1557	118.496	297.438
49.3583	70.4843	138.455
17.3661	203.599	154.921
49.0934	290.073	216.914
22.8978	121.262	210.094
38.8671	178.189	150.153
38.7758	114.412	132.155
45.6345	74.0618	277.019
37.0312	141.96	34.1028
108.827	45.6779	180.06
50.7682	46.646	123.081
78.3327	93.7109	145.597
72.8922	47.9191	75.1806
48.4889	104.568	61.0088
76.5278	45.8359	63.0196
27.74	116.785	56.9982
81.7787	103.559	165.352
51.3936	48.9886	71.8208
19.3557	99.4684	235.29
30.2259	88.6472	91.3809
13.6027	78.9641	115.822
17.9866	116.777	43.8571
20.0508	19.5527	427.879
31.4874	62.3831	131.788
26.0711	59.1146	436.103
38.1973	78.5323	107.28
51.99	86.6509	286.179
40.9146	46.2622	92.7371
28.388	69.706	170.138
86.0269	90.7514	234.86
76.1189	5.28961	70.8864
48.6072	95.6488	176.77
15.8312	109.971	76.6856
29.116	102.616	123.238
62.6155	14.2754	43.9326
25.0295	124.518	53.5662
46.7777	102.419	61.1304
22.4297	91.7733	183.135
19.7919	140.049	35.4289
85.2239	90.073	85.9756
25.9074	36.7976	140.496
50.1951	106.437	278.982
26.7566	89.769	119.874
51.9857	78.6032	34.1894
39.2458	70.1334	53.8079
99.8608	110.447	102.5
86.5299	51.9986	82.8279
47.4346	34.8712	43.1155
63.6392	111.738	115.783
58.8298	78.234	100.219
34.3133	79.737	267.352
34.6403	55.9298	150.735
38.167	115.581	311.242
52.5953	107.11	102.116
33.4647	108.517	181.466
22.911	83.6991	81.1972
25.3308	86.3631	45.9992
51.0944	93.6724	188.073
32.3079	79.1211	26.4558
24.5107	129.393	80.8601
33.1186	127.783	89.6557
26.5653	108.311	97.0907
21.2752	124.039	175.233
29.1725	78.5492	51.2028
20.4488	109.999	116.588
49.5974	124.855	205.486
35.9361	53.5324	216.654
47.7858	15.7706	117.828
36.1019	61.759	49.7155
46.0723	134.235	373.245
24.5576	25.893	150.786
42.5483	56.8514	101.55
34.796	167.753	112.442
69.5165	61.7372	263.862
34.2354	142.951	256.258
109.352	96.2439	257.557
13.2867	138.101	251.579
47.0244	85.2197	180.488
10.367	63.4874	65.8006
74.7355	96.2115	140.49
71.9432	80.669	188.35
37.9762	58.2858	271.927
42.3029	61.6315	300.741
70.3095	69.1572	118.614
15.7535	88.5857	257.065
21.0984	106.804	392.014
79.5982	28.1534	126.543
14.9123	74.9589	102.677
91.4455	82.7097	254.784
53.9232	65.0345	98.2439
38.8866	92.9907	51.8264
62.2753	37.2234	149.372
68.8532	85.9986	88.2325
46.1064	172.163	143.325
56.1168	361.794	387.284
97.3752	85.9352	288.063
61.9651	110.149	182.897
76.0811	79.2377	177.895
61.5317	82.3161	98.4023
35.1061	57.3941	63.1175
24.1642	10.2663	144.616
25.8978	81.2017	137.753
62.1213	101.368	151.552
69.9452	163.002	62.7187
22.2593	10.5243	25.4928
47.2337	78.8615	113.389
83.973	77.5031	26.2127
63.4369	155.958	210.43
40.7016	83.6377	198.75
26.7628	79.8915	234.26
41.8957	94.1487	189.879
20.8724	75.4318	225.757
69.3212	99.2869	114.082
48.417	70.2763	60.1229
32.9486	50.8686	80.5281
20.512	64.0994	145.54
30.3794	76.847	286.021
25.7362	82.6954	204.261
51.472	109.032	252.787
63.8811	63.3936	158.621
46.4394	184.98	225.386
33.525	52.2707	83.6704
67.3933	97.7858	97.811
40.3637	140.497	56.7321
32.5232	112.342	216.721
70.2805	103.713	89.4432
44.3	123.771	82.9617
46.4772	57.7721	179.068
61.9616	44.5435	265.382
10.7663	71.4089	65.5494
25.111	101.724	201.488
28.0475	46.5541	274.023
82.6042	165.915	253.757
63.5941	155.619	261.766
47.1586	92.6525	84.9985
34.4788	21.26	69.9826
107.354	78.1366	224.144
84.9389	89.1826	220.967
[truncated: 909,771+ more rows]

## Sheet: figure 2D
r (nm)	g(r) 35 ms: 2D HMM	g(r) 35 ms: fast state	g(r) 35 ms: intermediate state	g(r) 35 ms: immobile state
0	0	0	0	0
10	1.00248	1.36014	23.4667	646.349
20	0.966531	1.44248	19.4797	513.711
30	0.969264	1.49621	19.3907	348.409
40	0.966384	1.66783	15.819	229.903
50	0.979194	1.4518	14.7308	153.238
60	0.947729	1.2429	12.0534	104.495
70	0.954924	1.47656	10.0144	74.4153
80	0.945838	1.33506	8.08017	57.3425
90	0.926953	1.36327	7.41301	44.8897
100	0.916713	1.41714	6.94413	35.1762
110	0.911374	1.40554	5.42094	28.7593
120	0.899452	1.42505	5.27323	25.1215
130	0.886803	1.44963	4.15699	21.0042
140	0.87137	1.52012	4.31579	18.5773
150	0.857997	1.36323	3.84062	15.4424
160	0.856907	1.38113	3.57957	13.8574
170	0.848928	1.51433	3.3995	11.3972
180	0.831146	1.38062	3.0939	10.6931
190	0.822101	1.2974	2.9014	9.94317
200	0.826011	1.39989	2.84716	9.03334
210	0.813529	1.37716	2.77677	8.09663
220	0.809417	1.37321	2.45719	6.94736
230	0.801847	1.34219	2.55566	6.35939
240	0.796646	1.34001	2.43306	5.94204
250	0.79878	1.32634	2.35113	5.87266
260	0.791198	1.31967	2.16069	5.27142
270	0.782366	1.3825	2.07659	4.76852
280	0.782118	1.3782	2.10984	5.09471
290	0.786881	1.34687	1.92428	4.38544
300	0.776562	1.34522	2.10985	4.19412
310	0.765043	1.30281	2.16123	4.13904
320	0.766512	1.32988	1.94203	3.80151
330	0.768284	1.27042	1.68085	3.53492
340	0.767319	1.31718	1.97401	3.69387
350	0.76746	1.26226	1.80459	3.59994
360	0.769276	1.24229	1.78125	3.2974
370	0.763737	1.2724	1.64844	3.24585
380	0.756965	1.25971	1.56433	3.19129
390	0.756963	1.21555	1.58927	2.85951
400	0.762611	1.26027	1.57521	2.58055

## Sheet: figure 2D - inset
r (nm)	g(r) 12 ms: 2D HMM	g(r) 12 ms: fast state	g(r) 12 ms: intermediate state	g(r) 12 ms: immobile state
0	0	0	0	0
10	1.3865	8.30169	310.97	2102.93
20	1.15175	8.69334	280.925	2082.12
30	1.16635	8.7088	249.095	1864.3
40	1.13223	7.49292	202.945	1123.92
50	1.21258	7.38331	158.638	721.134
60	1.14602	7.82439	127.021	466.022
70	1.06171	6.17894	99.157	323.901
80	1.04371	4.96335	73.6213	251.321
90	1.00161	4.73504	55.7696	152.005
100	1.00755	5.17687	44.167	143.583
110	1.00627	4.61902	33.0285	111.376
120	0.956419	4.5003	27.2258	86.3911
130	0.950943	4.27588	19.9654	70.3708
140	0.943963	3.75004	19.8735	66.6734
150	0.904928	3.38943	15.626	54.6105
160	0.866751	3.46775	14.4934	49.6296
170	0.8623	3.32879	13.6996	42.5419
180	0.869279	3.7662	12.1347	51.3884
190	0.910931	2.98567	9.76518	43.4694
200	0.850281	3.46273	9.30963	33.8021
210	0.858118	3.04394	8.17618	28.3188
220	0.852851	3.29215	7.63805	20.691
230	0.884838	2.74995	7.46269	30.6314
240	0.864394	2.65429	6.93695	17.3686
250	0.882811	2.87668	7.33151	11.4697
260	0.848768	2.82306	6.4155	13.1863
270	0.869163	2.53887	6.05509	12.9103
280	0.850169	2.62511	5.62383	13.3174
290	0.844741	2.60448	5.87045	21.9706
300	0.858631	2.66885	5.49864	10.7922
310	0.869961	2.45169	4.98767	12.4827
320	0.842752	2.73753	4.6949	15.652
330	0.86165	2.48649	4.38503	8.794
340	0.878848	2.4464	4.23698	8.33871
350	0.838404	2.30461	4.28494	9.1662
360	0.831103	2.14781	3.86534	7.54172
370	0.849614	2.33096	3.64264	7.76649
380	0.833653	2.20089	3.74776	9.73423
390	0.859513	2.35165	3.71998	4.61085
400	0.842498	2.26779	3.14735	7.07854

## Sheet: figure 2E
r (nm)	g(r) 35 ms: 2D HMM for immobile and fast states	g(r) 35 ms: immobile and fast states	g(r) 35 ms: 2D HMM for immobile and intermediate states	g(r) 35 ms: immobile and intermediate states
0	0	0	0	0
10	1.57041	2.861	9.07741	96.7661
20	1.52126	3.28854	8.64917	90.037
30	1.51012	2.71101	8.11927	78.1857
40	1.4628	2.00681	7.51456	58.2863
50	1.3896	2.10223	6.72961	44.7557
60	1.30938	2.1066	5.99926	36.5035
70	1.26812	2.19074	5.24809	27.7751
80	1.23419	2.10358	4.5686	21.3624
90	1.18109	1.95358	3.95149	18.1336
100	1.13584	1.80952	3.40515	14.5361
110	1.10221	1.73523	2.9446	12.3595
120	1.09363	1.90861	2.5101	10.6263
130	1.06489	1.81402	2.19461	8.58738
140	1.0436	1.91147	1.90228	8.0423
150	1.02603	1.78078	1.67762	7.00665
160	1.00247	1.72676	1.48642	6.24422
170	0.97889	1.62141	1.33654	5.2868
180	0.958748	1.7392	1.20873	5.10921
190	0.947396	1.60898	1.11306	4.67939
200	0.928178	1.64161	1.03669	4.25406
210	0.908644	1.66274	0.97638	3.81965
220	0.893668	1.57764	0.919264	3.53659
230	0.878896	1.60646	0.882776	3.25319
240	0.870789	1.54596	0.845722	3.18297
250	0.85389	1.52523	0.824102	2.99113
260	0.850969	1.48428	0.809061	2.88693
270	0.838318	1.45281	0.789633	2.75656
280	0.825792	1.428	0.782077	2.67222
290	0.817318	1.34092	0.772279	2.47067
300	0.809862	1.44111	0.762571	2.46053
310	0.806301	1.38979	0.755543	2.2933
320	0.800318	1.29317	0.753506	2.25994
330	0.794746	1.35902	0.751998	2.05591
340	0.783662	1.2656	0.754265	1.98123
350	0.780216	1.38322	0.746637	2.01719
360	0.779917	1.30303	0.743807	1.94657
370	0.774868	1.28029	0.746117	1.89789
380	0.767486	1.2527	0.746441	1.93043
390	0.766725	1.18774	0.74155	1.75064
400	0.764381	1.1532	0.745088	1.67605

## Sheet: figure 2E - inset
r (nm)	g(r) 12 ms: 2D HMM for immobile and fast states	g(r) 12 ms: immobile and fast states	g(r) 12 ms: 2D HMM for immobile and intermediate states	g(r) 12 ms: immobile and intermediate states
0	0	0	0	0
10	5.11733	109.107	23.2709	1537.96
20	5.18811	123.062	21.8815	1296.84
30	4.98189	107.443	19.7271	971.932
40	4.58499	81.0677	16.6912	740.609
50	3.59435	64.7465	13.8609	468.587
60	2.99861	54.8701	10.9508	303.417
70	2.61353	39.8825	8.34741	205.113
80	2.43067	27.1406	6.26289	151.023
90	2.20475	19.4842	4.72608	102.96
100	1.88162	14.21	3.51889	72.3946
110	1.77739	10.6497	2.70258	53.5984
120	1.67292	10.6647	2.10898	47.1375
130	1.51987	7.67285	1.69357	37.7441
140	1.36171	7.21711	1.38974	32.0322
150	1.29014	11.0501	1.23809	27.0924
160	1.16643	5.71991	1.1051	25.7881
170	1.12743	4.77134	0.998305	22.5912
180	1.11096	5.47624	0.957512	21.4643
190	1.05611	5.4962	0.902397	16.1615
200	1.05413	4.8338	0.888613	15.5777
210	0.977118	4.34223	0.887688	12.7296
220	0.946512	4.33364	0.871755	12.1842
230	0.941725	4.26017	0.881333	12.0828
240	0.873308	3.86936	0.865589	10.4035
250	0.890779	2.98508	0.849554	10.1676
260	0.901106	3.17557	0.843314	9.18111
270	0.869817	3.32721	0.853537	8.02034
280	0.881183	3.21427	0.850964	8.57355
290	0.873817	3.62134	0.84849	9.06173
300	0.865066	3.73928	0.843317	7.57696

## Sheet: figure 2F
35 ms: lower bound immobile domain diameter (nm)	35 ms: lower bound intermediate domain diameter (nm)
60.3537	306.15
55.2738	190.33
117.834	134.58
84.0013	392.061
63.2998	123.899
34.121	177.762
71.621	135.26
133.529	153.875
107.322	138.145
18.4185	322.745
71.4656	115.993
69.4729	543.968
176.021	115.731
112.921	99.2226
89.5701	75.811
138.99	246.021
73.9738	182.173
110.223	202.419
82.2795	525.893
101.571	459.999
27.9161	110.684
22.2884	247.174
124.443	259.982
113.472	401.537
106.073	447.561
36.4001	203.68
174.912	350.21
61.9506	326.58
62.6624	91.5997
91.5317	75.1386
29.9406	124.053
50.5719	179.576
103.56	275.046
47.9013	91.31
49.4301	250.152
96.0839	147.497
56.4648	548.737
45.7665	195.654
76.0848	195.574
67.2621	256.377
81.7747	490.457
75.004	408.476
66.3894	102.181
112.876	356.651
106.452	83.2476
47.3235	218.718
53.4151	458.455
27.163	106.845
78.8852	478.405
59.1717	203.686
109.514	110.385
135.549	108.614
61.7018	96.2206
233.943	203.09
84.8726	397.197
15.8451	117.689
50.7492	583.775
111.037	80.518
37.8468	654.45
15.1161	116.05
33.1276	285.891
17.6234	109.028
25.1401	97.7477
35.4808	329.559
24.7625	357.97
96.648	122.851
59.0049	485.072
55.1994	205.95
62.5676	319.64
77.5316	170.753
10.3804	326.37
55.5075	134.29
68.3881	162.64
95.2857	72.769
156.864	148.929
71.4753	175.089
114.99	140.182
45.1011	72.552
31.8719	423.695
129.672	248.853
45.5047	372.915
46.2476	81.8903
41.8337	222.877
22.0814	120.897
33.7752	156.891
62.3726	230.841
43.5184	356.508
85	127.26
70.041	79.6991
56.6427	111.742
59.791	294.27
58.914	442.718
101.096	87.1053
151.804	132.024
72.3843	110.734
51.0129	112.48
53.2153	429.704
159.455	240.503
125.516	79.0401
71.7806	76.9333
157.19	66.3171
70.3186	74.8511
72.1433	129.929
15.9282	410.9
149.205	359.791
132.435	114.642
70.0945	34.1744
64.4038	293.723
41.6638	155.174
24.0544	185.207
121.249	259.968
111.108	74.154
31.4284	95.5676
46.367	127.458
22.9419	157.582
20.1273	147.786
73.0099	223.063
82.2231	248.764
49.1179	108.965
47.8268	241.898
107.887	96.1538
42.1229	414.752
69.2148	111.527
70.4451	80.9693
64.8047	134.807
22.025	188.75
110.575	151.436
67.9968	122.763
32.4777	129.136
95.1333	120.831
30.0953	248.88
38.5009	165.986
137.496	160.394
50.4247	162.084
44.5042	229.959
124.255	282.165
45.3085	108.724
48.9455	221.057
24.8002	125.423
132.928	98.2498
137.306	604.498
56.7804	260.123
53.9391	314.063
148.764	73.4856
47.7446	476.716
197.601	221.61
17.2715	196.919
76.1163	278.315
93.8599	146.612
30.4289	136.74
48.4097	87.7815
13.5086	104.292
98.5277	179.804
66.8062	360.668
45.5842	116.613
16.3738	118.749
39.2388	200.501
155.292	137.677
43.2874	92.354
61.1338	171.281
82.5444	108.566
83.6098	341.154
170.901	131.07
74.8863	203.343
54.541	153.373
86.5869	78.3481
99.1852	25.725
19.5168	190.863
299.802	112.019
131.524	311.773
148.933	310.968
56.0319	93.3666
107.915	225.387
63.5405	301.054
45.6446	116.817
83.1916	88.072
251.535	166.774
72.5503	392.474
103.561	134.549
156.877	342.45
98.5726	178.195
61.6769	58.7397
108.104	176.97
209.015	208.832
132.64	321.972
116.712	147.433
64.1722	232.215
62.8878	108.134
77.9604	92.9332
103.367	435.893
146.821	124.8
47.496	355.975
139.444	658.739
149.538	271.273
39.872	191.387
152.464	165.984
70.4003	231.184
47.2773	230.371
56.9405	361.588
27.6672	581.902
67.7085	260.032
67.5023	101.331
48.0123	121.882
33.0603	349.958
104.619	315.895
117.163	242.867
86.3277	166.72
117.031	269.646
59.6324	139.107
132.813	403.691
160.136	120.628
62.3789	131.324
58.7545	227.223
50.1258	406.077
154.365	102.371
82.7287	139.176
90.8173	229.129
135.609	262.048
96.1022	126.324
63.6548	130.662
69.6054	211.207
62.2451	490.694
69.9747	185.948
71.45	97.7471
50.7824	278.823
32.8709	354.618
60.2965	126.264
47.9208	126.211
77.8578	650.585
35.2743	600.674
51.2946	205.781
171.034	87.6194
59.789	555.092
34.3508	529.381
116.809	466.572
71.3908	301.517
95.3266	128.524
42.7026	594.986
37.1823	129.095
68.2111	111.056
52.505	222.057
140.503	379.335
55.4067	678.132
58.5801	545.617
90.8145	86.5482
53.7128	101.173
47.1381	252.536
73.6317	133.083
59.5218	207.989
75.6539	207.278
211.549	237.352
67.5353	367.066
49.0108	114.98
15.2115	323.054
46.6899	149.951
112.93	496.244
39.171	181.442
50.539	222.061
64.558	35.046
61.9161	322.553
40.6423	112.103
55.2137	78.3257
51.7445	128.223
30.5018	471.921
58.619	170.16
35.997	137.975
50.4671	179.28
23.1904	346.576
53.9319	76.8562
44.8345	307.865
72.2772	205.408
49.042	189.949
71.6469	135.955
155.62	98.248
102.517	283.398
69.4943	181.822
37.7471	118.387
31.0736	512.088
35.2191	125.699
85.2826	131.946
132.953	191.002
41.0363	161.474
328.307	104.058
158.031	110.356
58.5285	95.5674
93.397	332.663
235.499	289.994
65.8952	365.739
163.488	87.7561
157.625	352.272
127.008	222.013
115.455	240.406
46.643	138.443
67.8469	98.1111
62.4227	285.445
165.402	92.8049
44.829	199.722
115.641	86.367
63.9423	247.569
68.4275	158.778
88.6399	138.946
13.4827	188.812
39.4136	385.039
91.9877	405.769
96.2597	103.593
29.6827	126.828
63.7254	257.418
20.6458	401.643
123.039	154.559
88.3047	83.1376
66.0115	283.544
76.5301	249.851
28.7595	429.81
85.5331	131.389
38.4069	100.981
33.6515	352.933
53.0034	132.152
173.464	554.6
30.8506	615.601
106.411	364.717
111.076	116.892
140.801	121.694
10.9074	74.6213
35.5177	91.8821
3.3209	218.995
99.496	334.521
182.468	154.6
115.482	106.129
87.4118	422.593
103.042	248.601
43.2484	479.019
30.9679	61.0703
67.4342	602.351
24.3235	333.355
130.616	221.828
61.0796	508.128
196.369	72.3184
155.35	215.985
81.3826	76.0122
105.267	102.789
102.958	124.827
21.3885	264.427
41.7447	125.956
76.1664	181.695
53.0765	347.859
7.07827	117.44
68.4885	296.932
106.746	251.933
15.9795	518.427
29.2907	138.611
82.3664	443.61
125.075	257.154
93.0127	100.713
79.0055	365.404
80.1453	49.2112
62.4636	695.257
43.6046	238.657
101.699	194.72
61.7862	131.104
59.3883	106.021
102.375	400.187
107.508	189.163
107.752	300.611
22.7441	189.328
25.2738	122.467
81.0051	244.789
29.3059	80.5343
57.2164	167.454
58.8588	128.315
140.114	150.156
11.8762	147.666
80.8512	100.07
35.8399	75.6948
58.7996	460.918
126.665	177.363
101.216	200.42
113.64	91.6624
112.723	91.0985
37.8264	78.8234
53.1745	138.491
49.5344	242.666
94.9303	102.242
58.1053	263.152
94.0224	182.659
181.458	205.146
144.483	257.633
41.1323	136.917
93.9489	338.152
98.4972	415.026
45.6891	289.01
61.4599	223.405
96.7373	89.6751
51.1319	210.749
6.66286	241.341
70.6935	492.365
67.653	134.684
54.329	365.028
79.0042	114.018
86.286	233.401
94.1697	248.101
266.61	154.407
49.7896	96.5492
89.8562	355.922
63.9206	120.779
102.07	229.703
52.9756	104.609
134.127	92.2347
159.064	441.594
37.0557	270.538
31.0539	97.1747
80.8111	146.571
55.9786	81.1888
35.7431	147.617
323.95	309.685
72.3224	113.06
218.681	104.341
63.1622	310.501
69.8267	91.6635
59.5907	275.592
136.611	152.08
56.7998	197.886
96.9353	352.019
52.8318	101.463
103.886	283.007
64.5316	357.163
105.815	435.316
76.0959	584.727
100.527	166.714
66.9959	166.162
104.164	168.378
131.838	235.289
24.2713	99.3565
121.059	236.29
131.049	116.719
62.9377	108.186
48.8465	165.735
27.7233	317.804
50.7075	79.2834
147.508	359.268
63.8618	386.726
77.3128	104.199
173.872	109.828
47.3018	122.29
41.7718	108.365
236.234	88.2287
32.3126	421.905
106.941	107.396
39.2069	165.672
36.4499	123.6
9.75731	127.186
26.462	87.6246
85.8345	589.726
28.6874	284.377
22.2869	114.654
81.703	219.702
91.1133	87.2721
41.0128	98.7856
30.2837	242.172
17.462	197.433
75.347	188.919
19.6971	353.913
124.965	133.721
72.2118	180.806
71.1137	160.438
37.0753	129.952
87.1117	257.743
54.3742	248.28
88.2252	103.616
70.8632	185.19
84.192	102.989
17.9789	121.677
3.67397	413.121
44.6561	410.334
191.923	256.674
79.7999	565.548
68.4722	132.658
69.9672	517.361
72.3135	87.6997
32.3068	166.541
85.7103	213.222
61.8033	187.339
79.0549	275.07
110.94	201.312
10.2156	145.605
128.908	93.9058
202.36	237.894
96.8489	154.04
66.7946	203.908
58.3109	458.682
40.558	179.829
103.918	632.46
36.3253	220.44
42.7041	388.409
127.867	170.678
130.016	167.482
43.145	229.291
54.462	107.094
77.0955	128.68
46.9666	386.323
50.563	72.9551
122.626	243.017
84.0892	346.038
54.6896	126.731
77.7751	116.553
72.0458	242.68
125.266	118.308
124.625	185.654
11.4976	149.985
62.4259	182.073
34.8634	278.607
122.446	139.336
104.504	359.543
61.3776	121.493
31.9989	236.254
183.005	183.336
157.931	77.1056
91.3485	128.499
84.142	88.5599
65.2484	48.7045
24.5182	253.013
68.0707	669.026
37.9569	344.778
243.45	109.366
69.0005	199.99
212.934	169.932
61.3621	118.841
165.656	188.914
50.9404	180.161
67.4549	89.0774
32.5187	79.7611
85.5964	126.525
174.563	98.48
139.326	269.787
119.576	296.743
91.7231	93.6543
50.2013	126.209
61.7117	79.49
34.4905	61.8177
25.762	52.115
71.1016	262.246
64.9929	118.881
32.115	83.2321
113.219	112.159
24.0856	74.9435
52.6448	139.704
78.3264	98.138
128.383	151.646
30.234	132.959
36.364	150.08
14.9921	122.819
44.3965	120.719
13.9547	189.755
176.684	212.563
42.6612	98.8119
20.0932	107.699
51.7897	140.764
102.15	124.465
299.855	126.485
51.0399	170.015
77.5077	137.76
42.4619	135.466
82.1288	85.5377
157.662	119.149
71.4976	166.736
77.0485	218.351
76.5129	110.063
91.549	81.3246
90.2623	130.254
128.17	550.682
144.454	84.8938
25.4584	110.028
239.102	89.4114
115.69	304.135
32.6095	77.0825
49.2939	298.242
67.5974	140.145
26.6287	92.5785
112.487	49.796
28.4755	297.287
65.078	508.818
93.9076	327.948
68.3447	273.962
416.992	494.235
164.58	81.4547
101.711	95.089
101.859	117.487
156.138	128.855
83.2262	499.023
54.0266	134.797
55.504	111.144
73.8235	343.841
74.634	159.772
82.8944	143.293
60.7264	152.434
25.4219	87.5768
89.0576	214.592
19.7983	28.0951
170.023	106.036
48.505	341.183
53.6024	210.291
85.7396	58.2758
116.291	125.316
2.1201	99.3384
84.4902	135.533
25.1729	445.191
7.49661	91.142
148.039	166.455
38.613	298.027
8.7287	139.101
48.3479	142.66
67.75	96.8474
114.71	124.699
57.812	111.834
71.5047	119.159
124.387	97.8617
41.9469	195.171
23.9507	412.024
86.1073	110.199
173.666	297.094
73.3505	106.897
41.295	121.403
65.8044	77.4086
25.085	126.971
8.90608	155.171
31.9988	79.3926
181.524	89.4393
30.7621	211.457
79.4549	315.295
54.3686	78.586
314.33	98.0605
102.228	157.356
53.8676	79.3375
58.0826	241.501
52.0176	138.077
14.0675	232.432
104.535	313.711
55.0415	83.7966
41.6866	121.85
141.353	221.623
59.6949	122.18
57.6888	423.509
48.2974	171.584
6.02201	181.508
107.356	176.873
121.676	202.502
27.0818	208.669
188.653	87.9839
73.9824	97.4077
20.7641	399.283
88.7265	370.875
63.6764	470.491
35.811	88.0342
65.1261	285.979
46.689	301.591
65.3258	488.185
66.6404	185.929
85.1785	343.504
22.2517	159.55
25.7641	247.605
77.6714	85.4763
77.4089	153.558
218.074	161.873
52.5469	94.592
46.2828	272.354
291.56	90.1007
71.5948	343.752
58.2735	398.691
19.8949	98.3441
45.0608	298.463
61.186	211.418
54.3734	195.066
161.163	117.484
48.6052	123.758
47.1209	617.43
149.279	209.754
84.2842	205.623
65.7369	424.943
53.7963	223.793
59.4975	141.142
34.708	278.402
121.86	107.706
66.4755	194.518
59.0995	119.697
50.8921	111.707
45.8735	112.909
70.5146	100.423
49.5217	160.844
19.9279	82.5501
95.5808	411.925
55.089	416.572
34.0459	194.586
41.8086	141.335
115.299	201.952
18.6012	102.279
89.0469	606.845
47.563	425.317
49.1015	602.886
69.7111	298.649
21.9875	381.412
67.6504	270.825
43.4686	240.174
70.517	203.3
113.529	295.249
101.326	77.7654
149.989	232.353
40.1781	133.036
138.765	136.4
170.861	209.676
52.8065	325.367
71.1601	82.8478
61.4527	307.51
65.2854	182.239
64.2132	198.292
147.463	449.234
18.5804	96.5871
55.1568	200.83
75.9325	134.019
64.4836	344.932
57.8145	118.061
182.866	84.5965
128.498	110.622
35.5944	112.501
80.2616	341.794
61.8327	27.1791
206.794	111.533
67.4395	336.069
63.7933	262.929
60.5821	136.415
46.5851	263.922
111.893	101.541
108.788	202.72
51.4387	160.102
8.3852	288.209
120.251	103.567
51.5203	468.263
230.827	260.215
99.7981	164.525
55.013	100.067
12.7772	283.127
43.7515	220.861
59.6284	521.597
175.046	634.835
58.3016	94.4
57.0158	209.861
40.8421	76.0352
58.9924	126.239
130.223	210.842
63.3871	279.55
136.092	155.591
26.7145	94.1561
144.484	103.369
112.987	134.757
128.28	198.848
30.2635	130.298
27.6292	280.851
61.1499	289.274
56.5673	130.733
143.49	228.074
75.4458	439.18
142.457	568.184
11.6167	223.698
265.162	74.4283
62.3283	75.0243
66.3109	126.92
70.6859	51.2122
56.4891	613.636
188.317	322.548
106.243	203.13
73.8036	372.58
62.4135	161.107
91.1483	91.004
64.264	109.513
21.9707	74.161
100.957	132
28.0057	95.6286
40.2021	177.728
49.6135	133.051
108.53	133.734
57.1053	526
60.1382	445.045
50.0178	537.533
88.5706	678.014
82.3352	608.149
29.7501	83.8674
59.0685	217.36
35.5087	223.921
19.0913	136.067
69.3351	142.56
16.7409	341.538
83.7886	193.692
90.0124	425.802
60.9301	253.21
39.2202	193.997
48.8804	345.075
61.2567	128.41
94.097	102.063
10.5901	165.338
90.7801	135.32
28.6754	108.392
41.5784	101.409
49.9953	132.55
67.7588	252.472
34.7959	477.451
66.9834	107.847
54.8789	84.0728
44.6007	100.166
116.704	141.502
90.379	97.9898
47.257	171.576
5.43405	319.329
69.4022	254.074
40.4507	117.591
34.7345	565.893
83.1696	148.174
70.0442	73.3208
136.581	227.598
65.9747	117.131
138.369	191.217
71.4459	86.7423
201.993	122.708
34.7005	182.489
120.846	271.473
30.5508	384.895
118.438	105.137
69.693	131.867
73.5251	389.38
80.2754	174.456
43.3692	541.531
48.8729	397.171
88.0681	315.542
22.4429	329.003
10.3154	230.676
18.1657	272.633
37.1192	132.344
48.6219	264.846
104.889	219.993
144.157	174.015
23.0633	116.852
65.8619	135.772
121.903	225.956
17.186	413.559
108.532	352.975
60.2073	130.661
68.5539	126.334
138.46	326.865
59.0148	137.717
79.0081	480.893
161.816	622.124
67.099	82.9475
63.9872	209.822
69.6264	138.631
53.8139	167.11
68.799	101.771
35.2026	177.635
34.2285	274.523
91.1243	21.6319
68.464	84.1578
224.497	208.033
20.6699	149.429
124.084	185.427
80.5301	113.885
54.4167	247.473
68.6927	419.563
109.156	317.74
8.71576	329.561
86.8419	653.555
14.4463	134.516
114.596	250.231
144.428	331.672
9.76965	120.16
160.039	125.083
49.2552	225.757
62.4998	238.027
63.9747	129.874
177.771	288.209
107.615	246.892
45.7352	337.893
107.778	161.193
86.4859	113.778
59.1487	286.857
33.7222	170.829
144.857	653.115
96.0412	317.568
109.871	444.209
131.131	76.4125
57.7596	203.585
64.4349	517.594
53.4811	93.0425
122.691	110.613
68.5781	252.443
209.282	679.768
131.315	161.22
79.8737	183.384
67.9679	206.006
16.4775	301.707
62.6681	151.645
4.57277	271.514
125.866	181.129
38.6023	136.343
142.634	175.841
74.6991	186.981
56.3792	76.7912
123.89	428.202
19.1918	465.814
57.3054	396.899
136.787	140.377
30.3597	79.7633
66.9416	118.939
194.907	169.968
38.2198	230.76
33.4228	363.992
67.7921	87.5085
86.6258	141.995
224.326	182.757
110.63	240.422
68.3012	211.425
53.1754	176.912
63.4265	118.541
47.1553	258.807
40.3703	181.758
32.8512	156.692
61.1749	108.435
127.437	257.798
136.98	95.9068
123.317	73.1325
48.482	93.2839
76.1211	193.306
46.7051	78.9241
89.8422	111.292
39.7732	104.229
118.278	118.044
118.196	140.903
59.8058	182.961
35.3521	98.557
28.8554	388.502
71.5532	338.684
134.091	60.2262
116.803	277.521
111.585	399.92
32.8548	171.598
150.54	76.1186
67.4963	196.706
21.9168	368.009
62.1833	271.777
99.0407	126.938
41.5769	132.527
125.481	256.312
150.075	498.306
56.2226	148.515
115.805	120.346
64.8219	152.426
72.5574	494.436
8.50413	210.79
74.8762	82.2483
17.383	241.193
68.1605	279.046
33.8392	264.913
46.7031	151.14
236.355	359.988
169.099	160.61
194.633	126.241
72.4309	79.5982
93.8148	308.929
70.2888	116.322
84.2071	318.238
68.2297	98.5193
58.9921	356.874
59.5635	341.276
54.3483	172.045
72.5574	40.3753
100.343	299.358
57.2359	149.034
37.9478	407.217
49.3251	44.6166
86.5647	122.346
49.26	77.3205
60.9577	278.059
94.8932	241.828
64.3215	197.656
65.4406	126.824
41.2236	206.76
33.2938	110.962
130.602	570.969
52.9119	501.173
88.2813	48.5581
26.7871	502.776
65.8878	96.4709
86.6413	109.628
54.6895	253.956
32.8736	144.652
98.8652	115.993
58.1776	248.889
101.768	236.95
97.1782	92.8463
107.461	417.909
87.2368	365.53
57.8909	83.8737
61.7485	184.842
46.0298	643.069
81.9809	103.134
11.2139	134.889
20.615	231.827
134.851	44.6631
100.354	118.938
109.815	446.991
62.0435	117.028
20.1319	375.643
117.664	152.929
117.954	98.3078
138.049	120.329
40.4101	591.4
43.2455	188.767
63.362	94.9346
110.217	464.061
90.3318	84.6213
38.3203	285.018
83.2162	176.474
119.822	181.95
52.8157	548.178
31.0279	174.111
55.3887	315.427
113.787	321.304
139.759	77.0246
8.45243	73.4501
80.6566	230.787
101.308	421.553
98.4596	87.9138
93.9527	283.929
83.9953	114.158
70.6653	282.077
45.6195	134.632
26.5384	551.946
44.5831	81.5718
114.252	171.075
72.1782	193.941
80.6778	319.844
33.1202	328.01
98.0093	280.125
28.5188	346.666
63.8895	141.203
39.4524	75.6534
120.209	216.77
88.1433	107.426
40.8594	158.399
63.795	356.011
85.667	115.777
62.5137	273.53
21.5935	73.6818
74.7043	104.696
32.9944	181.997
73.1993	112.32
97.6876	102.933
110.432	113.618
56.2245	80.6565
108.689	264.283
50.8815	95.0616
114.778	199.736
17.6585	134.63
17.2822	100.25
15.1223	121.073
66.0917	94.0162
49.0117	218.588
29.5498	126.948
67.4708	239.686
100.278	314.827
72.8014	147.868
154.005	578.658
64.3896	125.649
44.9147	89.7588
108.037	52.9345
131.275	370.935
101.43	94.3243
146.281	122.678
100.474	287.132
69.9546	94.8283
117.349	85.716
81.9683	133.788
57.3083	74.1815
119.048	161.74
78.0884	72.73
42.0648	85.6927
58.2718	128.079
15.4663	107.452
58.2131	110.853
35.6173	137.574
19.2515	630.756
62.1524	128.469
104.467	128.36
85.2895	206.736
9.03056	61.6517
35.59	211.543
89.3919	110.757
12.7839	490.588
57.6653	118.599
176.63	389.649
34.7871	256.441
107.753	75.053
70.2082	234.591
101.657	127.397
23.1612	449.5
120.152	119.319
26.3414	181.053
60.6469	174.622
60.1303	106.57
71.0279	268.499
83.4141	72.5636
65.7241	198.572
97.412	393.145
92.3374	138.591
66.9331	177.799
142.225	175.639
76.3307	72.7718
28.3019	94.6416
49.2744	90.3142
20.4604	262.675
84.3811	217.868
39.2402	555.859
59.0787	138.125
75.7906	438.969
35.3695	321.605
57.9521	134.427
36.9328	513.9
65.3752	119.424
134.894	145.933
112.071	364.045
68.3688	184.353
61.718	232.145
39.2648	343.804
50.967	149.784
96.3082	527.481
0.589864	231.57
57.1018	165.428
115.915	532.988
75.5045	284.709
54.888	97.5755
76.1133	478.575
84.5443	157.336
219.127	364.502
169.529	249.52
155.588	158.13
12.6339	84.3313
114.092	137.035
132.865	363.511
15.4723	181.834
132.111	107.055
42.9783	96.3974
142.2	52.9587
82.4867	175.495
38.7989	81.236
97.4623	193.418
66.0589	130.37
74.3825	116.262
98.0974	141.126
143.938	237.134
56.4506	225.929
18.7804	77.5544
54.5257	567.979
99.9974	89.9391
69.9331	164.283
47.5081	53.5654
46.243	341.354
57.0231	208.477
92.402	374.753
156.599	184.427
246.66	570.169
39.5892	194.998
76.249	338.347
67.505	229.409
40.6141	172.359
50.8262	131.612
67.9861	80.3591
112.313	74.5842
82.233	60.9719
14.3762	380.087
49.6141	81.0237
73.5844	277.6
56.7622	88.7564
83.4002	84.9932
62.8687	391.054
94.8103	87.0746
76.1838	191.421
52.9217	126.641
38.4465	112.39
96.7418	171.179
73.6773	214.263
114.189	132.068
47.2181	101.863
13.4622	98.6094
102.086	149.349
133.033	131.731
161.091	177.615
61.9011	157.124
74.6585	82.6961
19.323	81.2147
107.502	661.261
45.2665	253.248
84.0745	102.034
48.1873	319.297
83.2873	80.9254
118.519	105.021
35.6544	254.339
67.8814	84.7145
100.235	384.079
38.6107	310.06
52.0518	222.236
43.6243	143.946
132.178	3.71087
133.485	106.865
96.4436	125.102
124.039	80.976
97.0569	85.2522
46.7541	105.667
38.4633	114.146
32.7316	206.358
119.003	454.496
148.974	186.184
4.14622	79.2201
106.643	124.822
115.531	159.972
124.653	223.011
52.4275	166.606
84.9497	132.193
64.8843	95.3609
36.1807	163.704
71.3923	118.872
42.4627	103.373
57.6849	338.982
53.6887	87.0838
41.9178	189.846
99.4704	117.129
46.6175	245.631
15.5536	117.18
55.2133	273.416
38.1052	281.326
85.8492	215.759
69.2107	112.702
49.4227	280.079
53.482	226.265
154.68	389.092
59.0118	122.453
44.9242	86.9931
34.8404	344.14
69.3447	82.8797
52.4611	110.696
29.2856	108.682
59.9651	99.1174
21.2246	220.641
62.3564	143.033
83.7893	209.912
53.473	156.487
90.0242	139.565
53.9287	76.1039
69.9736	73.0698
27.1349	115.366
96.3566	121.689
49.5812	103.533
100.72	233.257
50.3262	120.517
147.943	113.553
103.629	78.7916
87.5069	247.285
201.11	88.7925
93.2607	97.958
47.3317	150.959
110.988	142.567
120.633	587.41
64.8488	93.1729
28.3983	122.407
60.1823	138.868
91.9405	140.145
149.553	559.563
72.7102	351.625
75.9404	283.887
60.6616	345.926
68.658	426.351
66.5365	60.8202
81.6502	570.455
156.924	51.9111
177.908	131.275
126.519	225.106
132.408	302.802
113.295	77.539
153.698	355.319
68.7228	147.327
47.5402	588.378
80.002	73.0667
42.1832	503.251
132.287	174.532
60.7004	228.317
219.257	101.348
11.7683	161.213
17.542	89.441
102.625	332.12
99.5777	247.507
71.6278	135.482
147.801	427.779
89.0953	234.436
72.0326	102.095
53.5897	167.215
29.1468	134.124
76.8582	120.019
26.2262	139.67
110.412	212.643
110.925	191.337
154.021	379.567
46.0857	93.543
100.792	34.1545
135.162	183.87
73.0637	249.915
173.176	194.098
156.69	111.683
11.3814	140.643
188.3	96.251
104.345	189.73
27.3057	133.14
58.0912	102.749
147.817	134.474
59.1326	221.861
228.034	130.198
27.0618	258.241
37.3444	137.164
66.0086	224.06
174.182	79.3746
41.2255	171.397
141.041	90.3955
155.675	86.4425
31.1627	176.49
69.0252	553.087
27.74	204.437
68.7723	73.3874
68.1274	139.37
45.3435	108.25
98.9353	170.894
7.70669	249.719
136.966	341.032
6.24202	80.907
54.2149	227.489
35.8111	331.542
70.4838	86.3803
34.1277	72.5754
36.9389	109.862
26.5691	141.527
145.347	134.416
56.9588	168.991
100.725	125.568
54.1622	329.589
158.538	87.93
33.3974	105.016
56.51	132.74
93.6642	401.981
198.879	167.672
32.2306	389.212
38.4053	167.793
58.4512	79.5085
44.2673	316.324
70.6157	209.512
62.1386	95.2021
31.0477	531.359
130.661	169.537
112.71	129.929
81.9301	195.265
19.6213	308.593
66.2968	188.358
115.394	105.382
43.3974	174.679
89.0529	151.625
31.4165	476.948
95.3952	104.388
35.1857	114.3
49.6903	130.417
50.8863	107.01
26.9224	264.88
80.4183	130.796
35.8812	42.6204
88.783	614.17
231.195	275.258
71.9226	88.2123
60.3418	208.383
15.4193	201.853
74.8842	71.7009
18.4075	607.718
58.9346	216.01
73.6405	450.791
164.828	102.12
37.7956	463.269
120.988	160.151
58.6482	242.152
222.184	135.093
57.3544	549.396
62.1453	139.754
114.998	83.3485
57.9973	243.735
117.637	120.99
135.865	122.327
113.5	123.444
99.6448	134.682
144.524	104.26
48.2503	132.232
22.5691	100.093
108.174	91.1593
70.0544	280.924
19.3268	91.8454
99.6025	123.719
64.5675	110.789
44.172	79.5508
40.5846	141.645
51.7458	134.075
44.4169	99.0317
54.107	126.68
57.2214	106.503
155.889	363.633
86.2161	431.893
160.382	193.884
82.3335	99.2619
26.4147	170.972
73.3876	139.894
86.5489	298.855
62.8813	555.702
101.346	169.139
70.2015	305.18
133.043	520.939
70.73	134.091
71.1833	157.254
64.3188	149.067
27.4413	121.987
56.6145	119.565
50.1991	396.475
41.4922	170.956
7.57742	486.731
43.0225	79.6082
132.559	262.623
171.666	270.489
67.5165	435.874
84.1778	221.972
80.4174	464.225
72.3026	287.909
31.3201	132.945
56.7565	182.729
47.2263	59.4716
62.7868	356.587
39.216	275.384
52.7936	241.835
67.6982	140.786
103.978	405.47
53.8436	129.873
45.4532	111.2
136.094	68.705
47.6392	195.372
123.253	363.476
43.7453	164.838
58.8572	131.589
149.763	312.258
48.6597	86.2302
35.754	257.114
47.1863	529.853
119.476	301.655
40.1769	230.662
84.8377	88.8064
73.5653	140.4
70.1827	214.634
162.959	88.8134
111.658	289.634
70.9219	371.311
83.9087	229.255
47.6968	340.387
73.4085	128.838
200.908	652.29
141.404	306.799
71.0087	139.471
27.5597	251.56
43.4061	98.0697
121.631	555.863
41.3532	90.5618
21.2284	124.602
43.3595	201.823
66.0356	88.3097
57.2022	107.915
33.8614	173.643
8.83454	458.432
102.688	264.025
21.0962	75.747
44.4848	116.141
65.3292	79.7704
96.9816	225.684
8.77768	499.505
31.7853	78.7408
41.7898	68.0427
35.9279	227.779
73.751	137.615
17.1276	246.315
58.1147	127.984
77.9657	232.431
31.3733	139.315
0.655022	205.954
80.8713	255.959
119.728	138.666
59.1533	82.0812
99.9815	87.1318
21.8211	614.796
16.0018	452.638
271.108	310.885
81.1887	105.933
58.5888	443.662
76.2349	76.9759
50.4068	243.066
95.8525	575.934
86.4348	512.388
41.501	93.1169
140.423	205.065
140.328	124.016
61.4171	133.892
71.0342	134.506
124.305	144.616
92.3894	488.412
105.97	340.694
64.8614	96.0892
118.874	260.786
134.615	127.254
107.239	144.688
114.672	471.566
67.0223	191.604
81.6265	478.014
83.9595	159.06
108.779	660.554
92.7922	209.175
42.2647	164.397
72.1261	359.582
72.9468	629.099
75.223	235.265
46.0724	87.2529
68.9484	110.386
42.9826	79.2508
28.0885	86.7121
22.2667	351.74
34.8939	212.781
71.6755	102.83
116.526	221.381
123.6	250.248
74.2112	144.055
135.751	429.288
31.7672	80.1799
73.2346	191.894
40.6549	184.161
82.8954	278.291
44.0849	112.662
72.2755	112.309
73.6174	91.3388
78.5227	100.462
29.9036	342.249
92.8354	74.8406
106.332	225.138
41.4598	515.306
46.3664	122.813
117.273	246.514
17.1078	125.767
94.9514	129.669
21.9303	323.491
64.3432	215.768
30.9233	142.462
38.3422	119.36
36.6456	209.529
53.3337	106.702
72.8706	89.0033
22.5957	107.447
55.3232	80.2742
34.4241	161.983
70.2706	147.725
14.647	268.688
60.2964	120.194
222.109	360.978
10.4224	338.486
233.49	142.531
87.9034	74.8271
56.2313	298.962
184.84	140.976
106.786	123.201
66.0769	290.713
82.8954	117.156
97.6491	96.7824
103.013	82.313
60.5992	78.4869
87.658	128.766
47.2924	162.679
87.1087	93.1217
34.2593	194.553
141.797	344.884
12.2341	313.402
56.7786	194.416
28.3207	272.847
56.7512	271.123
37.1354	113.476
66.9496	450.056
43.267	190.834
64.5582	196.047
117.397	94.5174
80.4122	264.452
46.7642	281.657
114.55	263.834
92.4398	89.5154
100.68	143.429
145.342	115.795
59.385	114.173
50.7364	152.352
78.9372	90.5099
64.2702	132.179
29.3368	309.966
65.9683	75.5922
66.9054	148.176
12.5069	78.6692
86.5295	108.441
36.6295	262.109
203.257	79.2554
107.359	302.775
65.0599	103.673
52.731	265.444
57.8512	207.322
127.602	105.026
35.2892	74.5296
48.9169	382.37
55.1593	132.532
55.1984	91.7401
184.348	271.635
104.186	251.37
26.5939	211.648
98.9255	264.122
105.906	130.661
28.29	298.482
50.2092	687.005
38.8934	152.289
61.5757	259
67.1688	168.808
94.3939	316.26
126.945	123.845
95.6706	432.03
142.62	324.245
94.2372	380.493
137.062	99.1037
50.3219	137.783
141.784	278.466
67.2731	109.068
477.334	341.424
42.6728	204.013
60.8272	580.889
45.2501	221.917
116.039	90.2446
93.5286	142.659
65.0587	252.437
59.9553	244.547
51.6345	371.877
249.977	423.968
58.3785	152.631
64.8432	118.269
125.337	300.842
68.3322	310.36
32.9025	85.6389
31.9738	253.979
62.662	101.081
53.5036	77.5342
37.2303	121.787
109.554	294.399
55.0569	115.907
112.095	123.624
234.654	348.828
65.4853	122.118
75.712	175.483
98.2992	276.99
73.3849	72.2597
64.3364	215.067
101.136	137.587
68.1321	277.607
34.1422	308.184
127.414	364.06
9.94046	129.065
143.476	162.996
46.9648	152.274
36.9545	118.783
117.107	311.402
47.1844	94.1569
104.544	244.272
70.2517	127.637
33.4069	110.281
70.7655	260.412
118.828	395.151
69.9593	129.061
42.4057	93.1404
34.2465	169.977
100.812	147.748
47.441	209.048
30.9859	76.237
21.526	224.779
34.4004	72.7581
46.6115	625.482
111.665	103.436
54.7487	196.444
77.4373	23.1542
32.1657	424.709
92.6307	420.556
64.0105	73.1751
39.2168	91.6917
104.631	216.725
28.6181	101.84
39.6693	151.275
114.602	132.191
71.7142	133.094
55.053	135.459
95.0537	79.4849
16.3022	437.826
72.4778	198.477
31.9385	471.36
79.2076	149.815
35.1923	134.78
68.7914	51.9414
22.791	171.685
181.639	248.373
91.0129	124.823
62.6093	275.779
112.156	134.919
50.4102	183.727
110.045	73.5509
201.252	248.37
135.402	293.164
15.1071	59.5082
173.035	428.551
38.2292	87.7014
52.8067	492.055
53.265	642.594
67.4188	138.8
44.7656	125.135
43.9852	116.128
101.366	112.659
86.198	91.3491
27.8522	360.397
24.3004	219.308
66.2279	127.172
57.9868	250.763
46.6511	125.905
65.9306	259.573
176.191	122.54
161.553	192.562
10.9482	199.658
157.861	86.0373
50.7941	462.721
135.772	164.024
53.4746	132.536
117.814	451.695
43.0982	187.789
124.263	207.956
85.6167	349.755
59.0007	254.075
124.929	123.187
66.8271	595.266
38.1567	192.17
36.4088	320.843
74.9998	75.5613
102.139	497.8
163.01	93.6646
61.0185	124.327
37.797	181.318
178.078	136.961
65.8837	141.728
140.493	477.716
101.209	232.74
115.792	300.836
42.0552	176.388
72.1599	381.943
35.3158	218.539
50.2102	240.278
48.998	132.741
102.559	535.478
35.6998	102.539
134.502	151.626
41.5962	97.8395
114.966	245.855
33.8662	95.4942
64.3633	175.829
57.7958	196.483
47.7485	114.65
58.2589	79.0088
23.6814	201.121
84.6862	128.912
124.563	88.617
96.1682	145.045
123.037	165.577
99.9095	369.49
49.8837	122.553
142.708	94.5332
48.8004	254.314
35.5736	224.674
72.7404	323.538
56.9187	105.259
152.152	316.409
82.4808	188.026
56.4042	18.0025
30.6623	169.262
59.9648	184.704
78.0957	160.898
67.3303	215.113
47.0681	179.44
27.4531	172.708
50.4464	200.793
155.577	321.784
24.2933	156.618
107.315	249.427
85.6563	184.657
63.8582	231.735
146.117	301.764
144.279	202.428
69.517	204.186
35.7678	116.18
37.2072	72.5761
39.1689	460.977
107.097	408.047
45.9793	79.4192
106.856	73.5344
45.1851	194.847
56.1194	113.156
91.4924	128.66
81.0301	274.266
101.791	408.192
162.255	516.51
71.6799	451.186
65.4457	82.4428
75.0928	141.622
39.804	134.842
92.3924	333.3
23.8672	305.126
70.0232	189.983
70.2816	205.667
143.261	131.81
103.311	135.007
64.4894	264.521
71.2965	185.649
25.8459	124.307
56.8182	368.163
51.9786	166.152
121.067	50.4752
74.6339	207.056
72.2767	113.406
66.4717	469.138
31.6097	196.564
67.3688	300.954
138.98	275.564
89.0433	148.128
115.414	124.532
46.3644	500.891
104.5	107.922
17.6304	223.068
52.6882	345.589
47.7269	287.51
81.4968	395.147
38.6349	295.96
110.793	109.287
58.7473	81.9672
25.6065	235.136
37.2389	214.158
52.3211	165.49
23.9224	76.2627
57.8422	279.625
191.236	169.426
58.2123	109.274
55.3967	46.1622
49.4968	219.536
96.3868	105.615
52.7023	412.875
46.5906	127.918
111.032	141.016
108.847	463.56
70.7669	114.742
46.2415	180.978
69.6502	136.747
48.5081	148.723
48.2189	384.368
67.5728	411.084
145.848	170.22
24.7398	616.078
110.794	201.469
17.3031	207.869
46.9361	455.326
68.484	170.998
44.5685	481.403
64.0992	79.5094
128.439	251.974
55.002	173.05
67.8582	412.994
33.4268	202.497
94.8043	197.835
69.1745	111.625
46.1437	235.944
45.4843	248.019
70.7425	119.05
49.0974	248.54
52.1865	236.72
145.645	83.3668
53.3055	46.8423
114.362	89.3926
67.2687	186.775
197.517	183.423
39.3688	136.985
67.873	108.114
61.418	146.279
36.5842	86.1249
69.3043	140.726
62.5292	133.428
73.4278	128.093
56.7003	106.987
79.4441	190.686
69.6988	251.085
7.99498	375.778
50.5483	571.85
124.138	282.488
50.1528	210.534
46.4082	409.398
80.8016	92.2834
107.248	336.533
46.477	83.6082
64.8858	107.016
11.5945	386.791
32.9596	227.16
55.2457	220.012
46.9957	385.248
81.3997	77.5423
67.4727	119.405
38.3382	356.652
115.787	185.438
27.9427	477.702
42.3031	101.882
90.964	315.601
109.954	184.918
54.3355	298.405
112.538	403.1
118.151	366.169
83.3353	111.862
98.3581	79.5257
183.394	187.864
52.7053	206.216
29.9483	186.766
68.8516	312.66
60.7509	246.521
29.5327	95.3882
41.5143	186.764
104.259	614.048
159.629	189.989
49.075	224.309
52.3497	128.53
27.0699	95.1619
109.729	276.963
72.1125	101.841
161.389	239.872
56.921	214.88
75.4734	236.69
104.352	278.719
52.9583	122.425
41.6336	269.442
69.3545	124.829
91.4926	396.313
13.356	217.302
114.053	102.172
147.909	84.0866
125.284	214.709
40.3318	213.892
24.5257	419.915
41.6563	139.906
77.7071	393.278
30.2812	244.518
58.3071	69.3321
135.949	174.333
98.4195	102.988
91.8171	151.342
37.7214	88.0636
62.5163	144.064
11.2341	106.1
21.1729	228.904
33.8697	110.224
107.89	217.488
19.7364	98.5675
64.8399	339.793
14.9953	43.1935
26.434	29.708
55.6003	452.495
25.5015	93.2041
72.3815	434.633
19.935	233.704
29.0304	140.484
23.3901	178.922
189.856	79.9627
55.7023	82.3163
80.4935	203.655
63.0602	232.213
43.0611	169.279
34.6176	52.8552
56.5004	210.696
66.4803	225.36
38.5487	184.525
38.567	148.073
94.2616	357.033
87.8163	153.471
43.3329	229.792
136.608	310.302
62.8244	211.457
[truncated: 87,317 more rows]

## Sheet: figure 2F - inset
12 ms: lower bound immobile domain diameter (nm)	12 ms: lower bound intermediate domain diameter (nm)
50.8535	404.594
38.9051	42.7353
97.436	63.5687
50.0672	82.3558
136.032	415.892
57.1854	183.504
72.2521	80.1845
76.4321	92.8158
32.3659	267.864
83.15	96.1058
144.558	143.808
113.644	187.438
152.777	184.353
108.228	197.377
158.287	67.9994
62.2677	116.217
100.691	120.133
53.5647	287.864
70.1437	216.135
153.551	162.904
19.544	109.226
96.3837	409.6
79.1646	160.422
106.399	93.3427
28.6175	64.5964
26.3275	51.8947
89.7476	114.097
164.811	68.2913
106.208	337.383
41.5332	42.5937
52.2025	427.78
25.6686	184.865
177.836	651.106
135.451	242.679
85.3274	104.528
18.7859	163.562
44.4303	468.607
36.1388	112.232
14.5049	66.3624
62.0987	448.339
31.6256	105.395
98.0092	111.632
33.4989	214.678
47.8923	299.003
133.037	282.028
31.8117	191.202
95.6872	90.5924
35.6886	178.903
18.6537	142.498
33.0724	370.436
48.1996	149.996
106.573	374.298
117.227	374.476
26.6882	420.814
119.952	138.33
98.7214	190.427
130.891	71.0604
37.2456	165.182
182.099	220.512
110.16	39.3323
113.395	122.725
51.5543	106.294
31.1695	217.016
37.5074	158.508
35.0898	40.647
81.3335	206.787
36.2899	267.293
206.203	123.959
110.495	115.315
60.0369	127.939
69.9571	200.926
21.4208	133.435
18.1875	224.898
51.7413	371.471
122.406	197.901
108.644	146.258
12.4237	58.9971
37.658	120.011
28.9301	48.8816
90.661	122.395
71.5883	594.255
36.4652	219.633
99.2316	49.8414
67.6594	46.4891
91.5398	135.404
138.392	247.984
21.0444	225.78
92.8546	74.0653
34.3239	168.729
60.3089	363.124
96.8997	485.187
86.4765	253.67
156.784	435.866
30.5095	48.8077
113.706	50.5171
263.048	263.09
72.3031	115.643
50.5274	135.185
73.6651	67.5424
48.4273	45.0795
28.5508	57.6542
77.7873	222.352
148.27	52.8066
15.456	199.918
125.334	133.568
73.9812	784.83
61.2956	96.3991
107.539	163.28
114.267	59.4953
23.0998	119.71
19.7571	41.8519
22.7955	63.4087
62.6727	49.3854
85.8762	205.615
82.0016	105.355
113.416	173.641
25.0469	230.484
91.5475	232.386
87.7436	146.387
154.046	112.942
107.224	120.055
282.001	100.704
103.876	104.846
68.8061	55.7828
11.721	163.896
241.095	361.396
101.034	123.954
34.2987	96.2303
36.3805	112.325
220.11	252.967
65.5247	177.923
47.3297	98.2886
78.0866	145.247
6.91815	176.245
160.475	206.358
157.697	59.5867
86.1349	128.781
10.6461	306.423
23.6391	61.8887
15.9499	452.82
28.7048	68.1806
14.5225	56.8536
7.52221	122.837
94.9268	184.158
8.13061	255.703
104.668	40.643
21.9344	153.141
68.644	149.646
62.0832	58.4305
95.5856	158.98
118.027	131.733
10.2643	65.0765
22.9119	189.007
24.2133	184.259
51.824	41.9199
33.9724	120.433
107.501	217.627
140.808	273.96
120.844	60.6312
28.1912	335.748
37.2934	413.416
77.8747	53.1652
106.48	177.665
98.0322	306.115
26.8822	427.461
17.6475	49.4813
107.824	46.1602
48.4813	61.1222
107.015	140.476
32.0368	231.803
197.705	469.104
132.51	142.292
237.493	119.639
78.1479	158.187
112.98	106.908
103.314	55.079
15.1298	49.629
59.1847	64.7574
109.356	180.472
36.5947	335.084
30.8574	56.1781
180.261	119.022
117.285	305.185
41.6865	46.8725
32.7587	185.286
33.7501	55.3979
21.9031	584.902
17.1407	56.2934
76.8638	445.787
59.0638	96.6757
214.328	90.5859
14.9158	175.129
37.4626	41.9769
88.1276	109.058
90.655	405.035
75.9701	230.842
81.8756	46.2422
148.807	185.204
60.7752	187.312
106.96	110.447
29.8996	133.02
146.87	173.861
24.4059	135.209
60.6923	126.061
115.719	168.055
50.1442	136.918
32.2782	195.251
21.5754	114.836
89.105	65.0923
99.6141	163.465
170.878	319.934
37.7145	243.284
9.38495	331.328
6.55421	44.294
79.3533	47.6142
127.932	121.247
221.412	136.217
182.536	114.218
48.4568	105.839
12.2165	62.4791
73.6745	148.906
75.3249	399.793
15.5913	93.7677
7.60605	186.188
360.256	85.4389
34.031	48.925
26.6216	308.608
81.699	193.501
67.3691	203.777
72.2064	190.93
30.5784	108.196
66.9808	357.601
36.2715	114.409
77.8494	258.854
20.1126	54.9584
73.3376	146.831
143.229	195.67
108.021	86.6742
84.1017	107.87
58.5047	144.375
60.8796	229.539
26.6614	144.35
35.2895	44.2367
244.267	270.432
40.5338	58.0544
86.1724	122.711
112.137	353.169
53.7631	117.578
92.5237	343.08
81.3429	52.0222
118.619	140.998
28.2159	77.9884
86.4588	401.465
86.636	110.678
120.995	62.0918
229.055	147.573
99.7195	39.8113
182.962	112.522
142.852	145.336
156.346	38.5617
72.2029	61.729
128.582	100.971
35.4476	195.418
161.705	186.406
114.725	70.6527
60.3394	46.9775
23.6725	121.011
73.2659	52.7606
13.9736	145.867
3.08506	67.2153
115.152	166.765
48.9238	168.85
73.7879	273.78
79.6613	69.4891
76.2203	62.3578
173.023	170.875
35.8782	126.507
104.305	231.721
36.1288	145.199
105.316	153.656
163.045	140.353
51.3758	60.6217
126.812	69.1239
98.6363	132.482
203.501	213.617
15.4774	106.802
124.05	199.536
102.221	59.9849
33.2579	50.8917
23.5707	128.762
35.3824	66.4482
65.6021	318.989
176.143	280.423
17.0704	145.635
98.2514	199.833
101.152	629.587
51.855	218.064
113.332	142.697
96.2008	56.0171
21.6932	163.487
32.3081	172.295
110.258	303.177
105.682	44.9528
147.368	69.1817
130.198	89.3231
155.27	249.286
376.571	181.128
30.6404	50.6577
30.3667	62.7299
87.8913	153.77
86.3728	335.241
25.8402	166.048
42.7865	199.916
44.5577	217.806
46.9857	45.3275
74.4648	232.572
38.2623	51.2315
62.3388	188.727
36.8102	190.479
82.8666	301.941
52.3823	135.718
91.9555	177.951
14.4778	206.7
86.6033	274.776
49.3226	56.5254
135.809	62.0927
128.924	340.733
12.4484	92.1416
68.7428	103.664
46.3557	186.229
68.6777	299.195
31.7086	147.793
164.052	309.613
236.395	88.934
235.347	402.358
86.8326	305.646
89.6834	64.7273
62.3265	80.3226
26.0438	178.935
31.8339	169.201
86.9865	142.96
80.7309	239.401
94.0353	193.902
51.0128	196.632
31.2197	61.3919
22.7314	163.946
35.554	312.431
20.0732	100.773
207.505	159.582
87.3833	162.019
126.699	62.988
130.608	93.84
34.8976	196.626
23.9315	128.914
105.261	53.2023
110.842	228.614
62.4106	416.141
113.851	469.875
123.865	45.3887
155.392	59.5742
115.769	119.663
28.4134	92.8961
100.717	128.775
36.7759	188.365
21.0007	52.5692
138.538	341.612
187.573	38.8475
88.682	144.189
75.0696	53.1336
141.364	255.722
75.8473	67.6343
165.368	147.818
16.8292	220.211
36.9125	59.084
121.307	57.0644
150.814	84.8909
154.115	175.856
338.617	84.2248
68.0996	109.132
22.9376	326.758
136.689	121.908
61.1504	133.321
34.3527	185.557
163.203	160.775
97.0251	161.086
55.6653	102.013
117.03	510.485
31.8856	65.6252
39.6558	51.6982
14.8628	254.056
59.7342	102.19
71.9658	170.198
106.994	291.354
24.7651	243.389
111.83	145.234
62.2988	48.4922
105.221	127.268
82.5898	113.94
104.809	49.5503
26.5585	117.798
223.784	86.0939
50.392	387.554
73.5799	50.2188
72.3779	62.6158
92.0477	49.0641
24.2792	148.393
117.789	157.676
36.6137	107.817
33.283	169.397
24.0373	80.4313
245.153	134.553
62.5551	113.076
94.1773	122.549
27.9795	44.0862
99.6162	162.673
103.891	62.5811
82.5855	47.4944
87.6688	48.1596
47.5379	301.081
58.51	167.434
142.817	360.566
131.689	261.377
60.4011	322.765
71.5203	104.621
25.21	129.166
101.417	143.916
15.0965	323.402
15.6069	102.911
91.862	166.884
23.7027	150.465
53.7408	182.589
35.7832	184.331
152.505	57.123
106.759	120.678
86.6385	39.5318
36.8393	128.594
93.3283	171.605
126.159	238.636
9.06289	131.232
60.9958	126.747
51.4287	218.32
88.6769	194.383
85.6099	261.704
19.7909	44.1592
110.801	298.786
71.2884	346.352
54.8392	201.035
144.604	184.554
50.8827	41.2787
98.3713	134.973
106.228	134.573
20.0092	328.888
74.818	70.1999
53.5421	128.611
59.156	683.574
31.4257	87.5093
105.241	235.453
162.67	337.821
148.045	192.148
59.0236	53.8202
125.476	141.399
92.1318	78.6042
8.71353	37.9043
80.0652	308.532
179.936	164.739
28.1337	140.5
36.1383	383.313
33.433	366.389
28.3126	59.19
3.15583	92.2637
32.1497	173.406
50.5704	60.958
179.968	114.95
116.899	64.4385
19.4387	108.336
99.4053	149.994
138.97	119.321
19.4168	58.8706
224.502	128.412
25.6811	325.867
133.399	110.29
16.1964	192.392
67.381	249.926
83.6768	161.755
35.1688	12.4614
87.823	38.138
67.512	66.5159
67.0082	211.05
62.27	328.94
32.1681	208.824
33.7923	324.402
134.897	215.06
80.062	83.3242
19.8904	120.998
143.647	162.36
133.379	54.7548
18.7008	57.1245
107.882	639.925
49.166	189.779
93.395	105.536
60.7829	108.029
65.635	200.243
130.858	92.9244
87.7216	55.0455
79.8984	118.184
169.777	64.9793
15.8554	50.1532
32.3484	88.5298
22.7857	115.478
89.912	44.5991
83.8696	191.378
129.866	60.1741
77.2131	372.39
100.772	455.213
187.33	245.231
32.2135	279.726
35.185	390.215
7.70414	127.652
107.706	102.149
64.9035	176.825
68.2516	378.354
30.5745	46.4464
28.8336	127.866
59.0108	45.6126
41.4517	419.228
55.524	189.111
24.4848	272.732
68.5806	60.1338
35.1855	133.312
28.3052	48.8249
6.40515	484.057
4.96778	70.0528
155.136	42.873
102.475	114.891
74.5908	142.682
171.115	169.405
85.3842	177.296
100.509	96.685
111.408	33.396
52.7479	80.7941
92.9828	64.3475
106.763	65.8669
115.426	241.589
64.4248	47.6285
23.5466	156.698
230.151	61.1018
90.5576	99.9617
30.4954	116.251
90.5731	321.098
143.948	181.469
114.307	150.626
35.5738	317.427
64.1232	174.581
83.2562	159.1
18.9204	163.007
23.0456	287.026
187.28	167.489
10.3436	51.2264
75.5301	189.167
78.9344	324.164
107.882	459.814
136.106	59.4155
58.2376	407.477
86.9157	143.497
69.9351	144.409
241.899	192.493
76.2926	400.559
53.4015	193.522
36.7394	231.132
92.3883	97.294
111.153	71.9549
198.306	64.6336
75.6862	250.556
150.511	293.568
25.1134	107.964
108.664	110.692
32.401	122.309
26.4368	63.5618
119.236	157.517
33.619	54.263
119.253	265.21
92.8034	338.188
55.6189	98.3356
76.1566	222.44
29.6903	60.5524
19.58	188.414
20.9138	181.614
289.79	178.429
132.707	214.909
154.488	250.305
36.9001	187.781
27.7149	115.507
5.80326	172.233
74.5465	398.511
137.003	175.242
143.155	170.715
71.3838	99.2057
102.65	126.78
8.34914	215.37
96.7405	92.4176
82.774	113.717
129.18	59.9495
21.4786	59.8853
18.1724	135.865
50.8319	236.823
73.7358	269.736
9.6684	70.6998
17.7666	96.8691
161.336	211.889
42.6251	178.246
99.2289	67.7937
19.3318	142.881
105.432	47.6521
117.398	173.34
140.488	187.483
154.328	148.278
11.6145	111.252
135.721	172.409
24.1146	191.995
78.193	172.307
127.547	155.095
188.873	143.07
20.1735	41.372
81.2939	56.6161
123.62	174.691
77.3972	424.724
85.9156	352.343
152.298	110.661
17.5687	134.886
164.358	108.818
207.343	244.345
21.7549	100.223
89.1184	49.4965
16.1201	235.974
100.755	104.47
79.2165	455.684
67.3469	214.829
66.6405	67.0172
75.5039	46.1671
66.0303	117.557
53.6926	178.138
86.4152	56.6325
87.8863	178.612
20.2202	202.454
154.583	67.2589
27.8745	198.506
79.9237	115.87
156.753	112.118
9.22523	228.737
148.572	99.7648
122.68	341.682
16.4597	60.0564
193.613	63.8009
24.5595	148.348
25.5151	121.671
86.9248	184.542
120.912	68.4876
78.7384	194.547
94.8461	269.801
75.3695	186.746
146.268	213.837
66.4513	233.394
139.195	68.2279
167.128	150.937
79.8081	59.6543
105.892	66.5102
82.941	178.876
45.9882	151.012
38.5342	96.6537
96.5257	170.304
153.496	55.2417
30.7741	195.379
119.009	123.858
136.954	55.8925
194.99	50.4039
158.152	55.0049
85.0002	136.073
222.921	144.015
20.5912	88.9837
180.866	217.173
16.0135	55.8265
126.46	269.652
85.3714	245.565
70.278	146.252
63.8086	404.127
97.7678	43.4077
165.545	247.205
39.5502	349.63
145.896	269.435
212.448	74.759
139.014	45.5389
87.8344	156.951
15.2413	350.585
12.4186	453.868
9.05085	136.533
39.1608	242.999
151.869	158.011
66.9469	68.8208
75.7443	111.58
75.0077	68.2932
53.2599	64.9683
245.951	196.266
144.551	101.946
65.9823	667.689
23.9422	332.006
21.8466	41.5063
103.807	45.6712
50.6465	48.616
11.912	228.397
10.4397	68.7285
27.6388	206.027
95.3801	71.6216
133.698	212.059
70.8987	251.48
42.5468	420.299
45.9538	111.711
65.7491	116.018
109.456	346.025
82.9181	118.904
101.154	279.439
62.5656	257.043
18.7785	332.914
38.4373	154.557
115.793	540.475
139.837	153.443
30.625	303.677
25.8226	57.4774
44.8774	67.5641
66.9615	287.84
211.603	71.7816
187.257	254.128
192.107	109.955
20.8379	64.4248
57.34	65.9278
91.1872	95.6368
75.6174	522.346
95.8051	153.015
25.5912	384.267
72.7272	118.171
51.2847	153.613
218.204	148.37
77.3558	178.446
156.553	204.951
116.61	232.557
111.611	666.494
24.8615	139
123.708	154.091
100.812	39.3326
115.578	196.628
87.532	221.936
82.6002	132.556
89.9665	208.528
53.0041	73.905
87.0602	210.427
14.0197	50.6331
109.94	41.6503
182.403	438.9
77.1759	187.349
126.435	129.565
126.534	50.4857
75.9558	262.627
117.118	264.311
104.646	789.46
102.425	42.0161
114.496	54.9321
117.756	147.442
191.833	139.566
94.1754	202.676
175.016	148.708
88.325	90.4836
82.8868	105.928
101.921	418.93
81.012	125.946
109.169	110.736
5.35939	608.808
59.0536	55.8711
94.321	194.856
4.12154	59.0085
121.188	53.2644
227.639	59.589
88.3024	136.971
83.0401	80.289
144.737	121.405
380.907	133.076
102.182	308.861
46.8233	46.6724
69.3952	225.931
176.641	282.627
14.2178	137.378
113.944	205.938
100.814	40.1357
27.8582	134.136
108.261	91.8706
56.9448	97.5397
232.675	59.4309
140.776	43.131
42.9271	80.8536
28.5367	277.506
103.099	353.19
101.101	156.571
6.4191	39.0265
82.6302	274.658
92.5873	144.458
65.4757	140.632
137.91	112.247
105.225	196.703
92.1039	257.416
100.888	212.143
163.714	86.8161
42.6224	195.958
20.0167	131.054
52.1797	179.163
40.1663	219.722
94.44	250.629
85.4437	67.552
70.3411	85.6862
29.4556	65.8694
66.8026	92.4754
80.7911	50.0859
18.8709	47.5615
19.6974	168.618
56.6893	145.7
30.1524	118.097
69.668	69.2755
20.5182	353.998
90.7263	88.0262
185.821	183.195
27.7625	208.438
2.11905	365.596
59.4182	147.065
101.96	202.139
12.8776	166.14
79.8401	41.1561
35.1445	112.38
23.622	147.877
25.1966	51.7647
58.5397	110.314
120.719	45.1624
138.483	202.935
99.0302	204.496
270.104	190.812
14.949	127.928
165.743	197.925
39.1156	93.0528
121.78	185.821
20.2875	60.0612
87.7373	263.987
24.4124	224.5
66.3717	155.586
283.434	218.345
81.0545	195.809
45.0152	284.01
146.84	417.686
174.625	98.88
99.3304	45.2003
13.898	68.2279
87.5139	57.0502
172.214	269.522
25.152	150.919
122.916	171.043
131.793	475.382
128.245	120.803
138.56	68.8257
113.687	199.14
140.271	59.7271
171.251	189.021
115.978	61.8288
29.7974	182.354
9.27308	322.624
91.017	222.257
24.756	128.979
11.2155	89.5325
18.678	342.765
87.413	48.4266
146.233	157.839
36.9282	186.164
118.356	70.1248
80.5396	95.3465
74.9589	142.025
188.127	239.207
183.337	185.569
197.15	164.966
335.27	318.485
69.7577	306.069
162.108	46.3711
36.0374	425.754
63.7629	304.609
19.4551	231.996
52.304	17.0027
14.1827	117.495
107.957	198.973
9.47615	306.711
92.4681	62.4433
55.5018	51.5823
36.3855	66.2423
104.254	117.93
89.7559	69.7811
144.148	141.758
108.831	106.4
117.235	183.782
19.2026	177.19
110.749	178.061
128.618	65.8986
28.7591	62.9825
106.635	47.0672
64.3504	47.2376
27.9228	493.061
101.336	402.323
164.538	280.439
125.976	185.979
120.808	150.045
73.2504	122.448
88.4642	206.771
133.791	311.149
144.645	138.22
41.9548	146.201
135.422	96.4644
71.6578	107.098
185.786	58.2932
30.4528	427.317
149.833	138.796
137.417	79.4214
76.0839	213.372
6.98831	53.9579
90.5422	334.487
82.0032	325.293
106.541	57.968
171.073	117.832
93.2674	153.896
53.0989	81.7343
78.6118	350.62
25.7345	190.521
32.5416	147.962
18.4976	206.67
114.106	133.27
98.7559	179.869
84.6765	62.1599
93.3614	154.871
141.845	45.5332
57.4979	60.5585
17.0117	37.6407
55.8353	58.7961
92.2034	218.749
96.4764	56.7146
24.6735	142.938
97.6167	54.9264
30.8995	122.622
80.5752	258.953
23.8602	68.8268
134.064	260.454
169.953	167.029
139.726	199.147
104.556	566.773
152.33	51.8436
18.684	57.8465
60.8248	192.577
5.80524	154.214
156.171	691.363
10.8967	149.676
25.3744	49.5395
46.2515	326.272
109.252	207.676
56.07	54.8262
86.7792	81.2502
132.988	48.801
133.207	88.9799
86.304	92.181
66.7585	96.1894
118.684	561.39
20.6129	224.424
101.945	50.8496
29.6036	133.962
86.6078	119.861
28.2083	113.416
81.8138	49.5214
65.5457	445.508
83.8499	58.4519
46.4765	761.954
93.2759	82.0086
13.9858	67.7723
119.993	142.767
44.8821	293.094
93.5229	145.377
123.905	123.93
106.675	66.5236
63.63	113.34
11.7809	63.3459
281.293	502.214
84.8901	54.1532
82.7861	188.619
135.768	48.8691
21.8731	158.137
79.6927	247.675
94.3681	382.9
53.0989	218.416
72.7237	350.432
138.287	303.73
75.8395	170.746
157.188	135.715
17.0982	51.4489
22.952	141.17
29.8309	99.6306
127.868	384.656
59.4854	68.6898
7.87283	221.636
7.24972	281.822
495.376	75.0805
59.505	98.4827
193.772	54.0377
89.0869	131.81
88.9757	110.023
1.59759	63.6815
89.3585	108.409
20.3919	89.189
112.703	43.3039
112.146	62.2758
175.212	70.5397
153.686	113.352
24.8611	159.811
140.952	95.4608
135.884	273.83
48.9363	63.0768
94.7095	112.473
113.805	184.542
22.7877	103.626
125.17	148.596
116.445	51.264
93.2807	288.032
195.537	148.374
15.6684	80.1774
11.8213	64.7638
9.72858	70.7587
12.759	161.346
86.8746	250.148
72.0375	175.818
135.4	226.935
30.658	65.8744
80.3649	68.0345
74.8835	215.856
31.6125	118.123
89.8005	116.288
189.345	251.581
9.01964	107.643
12.298	183.01
23.599	151.286
112.184	109.759
111.978	194.343
86.3769	244.559
132.2	125.765
93.7973	150.214
29.8648	48.7205
31.8298	67.4508
150.508	126.803
21.6885	78.4519
17.6461	71.4712
85.2757	237.911
69.5764	38.7907
61.8302	133.774
108	112.262
148.411	152.827
52.4019	220.461
79.5349	58.8051
88.0773	145.594
45.1259	465.097
166.048	44.3732
30.9486	111.287
128.061	289.118
190.185	110.252
76.9835	105.028
169.338	109.3
8.11378	441.708
58.8101	212.595
29.3536	150.354
155.641	68.2756
126.465	144.123
27.6854	117.364
45.2143	140.849
185.9	158.993
194.533	100.656
62.8379	141.429
233.302	124.369
46.2881	147.518
74.3653	289.975
69.5653	230.867
77.1149	298.318
98.6903	40.0767
125.68	47.654
171.593	110.393
219.124	139.998
30.9087	65.0359
86.0376	214.285
23.0407	366.432
46.0335	103.215
27.5319	57.7128
396.298	175.785
136.532	189.624
92.11	102.54
35.1352	39.1013
60.5279	51.7036
96.4485	57.2826
93.4998	63.1272
174.375	67.0091
1.34364	94.7148
85.1582	151.787
28.5416	55.8548
17.2045	99.1956
45.2597	310.915
130.705	55.0028
40.0556	144.923
27.2809	43.8277
119.265	120.502
28.0397	62.1593
150.071	326.664
12.3145	140.172
127.205	123.373
185.544	357.166
71.9359	38.1176
64.398	51.5716
25.338	122.612
111.453	112.816
66.229	188.329
79.6181	57.1491
82.0361	43.4212
91.1994	115.24
82.7262	201.404
98.8975	262.849
55.3014	157.277
163.786	93.4503
103.68	165.324
53.8963	51.1449
153.298	65.2918
295.991	179.002
99.2201	131.432
13.3318	258.665
95.0326	151.9
146.379	122.682
125.773	95.4829
118.82	56.9934
135.694	100.93
93.3825	66.8735
220.74	419.05
127.082	56.0914
123.042	184.169
38.1039	595.312
58.7791	142.815
23.1166	160.1
149.779	121.759
72.47	418.619
94.1039	338.503
30.429	54.931
125.697	480.835
81.9055	59.5314
91.2981	183.14
22.977	47.4773
152.682	41.8853
30.5315	190.123
127.804	130.868
64.5993	57.3526
16.0615	60.4766
81.5287	42.2202
98.7956	162.548
48.9983	187.223
29.6473	387.42
156.888	208.059
206.6	196.902
18.1255	184.031
30.8121	332.005
29.8568	58.0268
16.549	152.385
106.522	216.963
73.3182	186.836
76.7359	155.409
15.1901	223.884
23.9134	356.464
47.6634	54.9073
74.026	183.559
64.8477	137.777
128.642	149.684
303.154	601.608
153.334	37.7852
83.2576	243.839
86.4044	189.581
74.622	277.78
203.288	277.482
15.6812	157.057
120.174	367.988
150.879	39.8414
109.02	245.99
130.947	426.972
124.535	115.64
106.638	177.095
118.042	259.714
82.6199	204.668
29.3207	312.131
71.2988	401.318
36.7599	135.48
49.2058	439.782
96.8272	64.1018
29.7671	316.528
53.6027	210.798
7.54794	164.131
80.8299	272.26
75.1555	284.544
83.9598	129.4
28.9826	110.158
87.2223	61.2925
68.9268	329.561
34.0742	50.5889
180.79	137.623
105.994	115.949
225.082	182.664
109.997	70.8211
24.6933	183.419
126.214	370.29
76.2828	50.1682
101.54	56.1441
106.041	136.02
28.6679	129.072
59.7069	300.228
44.5447	48.6951
119.045	166.641
77.1492	59.9747
77.7488	183.947
81.64	55.1811
89.4723	539.213
94.1244	233.728
57.5236	1166.42
266.797	48.0257
122.857	75.0963
78.9347	168.627
15.7971	134.518
90.476	50.9916
66.4193	119.061
54.0749	75.3072
146.093	237.475
173.531	179.197
72.3631	57.4171
147.053	218.62
86.7382	55.4462
15.2727	365.209
29.5704	297.664
129.559	46.1728
113.414	143.934
21.4713	109.372
75.7939	84.9353
17.8341	66.6355
102.395	58.0733
61.0554	134.92
104.675	138.465
75.3496	69.051
119.122	214.232
118.651	107.039
22.7172	48.0529
28.8166	176.168
57.5245	145.443
40.4719	111.772
129.283	45.1953
71.2887	76.411
19.1415	694.091
55.7616	159.364
28.5826	357.534
86.4648	895.963
55.7027	53.4287
63.1071	57.2765
154.337	254.851
97.5001	318.146
227.134	70.7264
24.6444	262.456
87.992	94.1986
119.889	154.348
75.5407	46.0958
21.4126	124.512
39.8419	169.742
116.316	64.9731
13.7279	122.036
222.497	288.529
141.056	65.1754
134.581	72.9962
86.4455	235.255
16.8537	146.728
96.9802	104.133
132.95	64.4463
81.3778	315.967
112.849	67.8852
26.6306	103.56
28.1892	46.5237
154.578	121.873
142.593	42.5918
90.3202	62.8262
6.87848	181.279
11.4263	129.542
157.269	107.97
26.9068	42.2973
75.4585	55.7567
72.8076	111.03
83.9318	78.7688
24.8778	53.1116
93.073	38.6035
112.255	63.7306
58.8619	122.59
11.9137	49.4209
79.103	62.1951
67.5081	105.244
19.0724	67.7329
99.0562	68.9412
68.2422	66.4241
97.4769	40.1722
93.9932	120.111
25.845	71.4002
28.7756	120.217
49.4776	201.76
93.0688	432.345
28.5061	132.041
109.083	150.94
91.8765	101.804
21.9395	356.401
90.2375	50.6415
153.991	67.5088
19.5009	96.2886
9.96809	98.8291
52.4928	93.0079
87.9123	43.7234
96.1904	170.052
84.7746	154.583
83.1598	44.0577
72.1354	246.863
15.3616	89.9384
28.2304	115.854
67.4593	70.3093
110.928	94.8341
139.182	220.846
120.098	85.8323
73.0022	401.976
190.656	328.41
95.2608	97.8306
130.648	96.8311
116.59	89.9371
120.088	233.282
73.9489	160.209
74.4438	132.43
34.5919	181.257
119.167	224.48
79.8904	109.034
59.807	38.757
169.331	104.008
62.9598	120.443
163.94	116.181
130.111	31.4138
177.722	91.0024
109.239	47.6796
204.817	200.323
194.809	112.048
36.5201	138.304
87.7525	424.184
63.2381	235.216
319.809	80.09
233.902	58.7611
112.399	42.7495
168.201	115.491
224.613	65.8681
105.705	157.099
105.57	93.304
139.018	36.759
78.5811	173.411
37.5084	166.691
218.261	287.195
125.399	100.376
151.327	143.632
166.672	346.363
133.424	127.864
112.783	109.963
56.6526	76.8882
35.7929	131.989
227.206	90.1519
167.438	136.739
67.9362	95.0377
120.82	140.552
53.7626	96.0496
53.2694	238.953
125.518	51.1621
190.289	350.446
56.3518	77.8721
41.8854	284.958
80.2529	69.994
185.292	132.695
119.317	348.159
111.083	280.017
68.919	115.475
88.0457	52.5535
140.629	309.988
76.226	38.1344
75.4541	64.9751
83.8096	110.886
135.556	64.8435
139.481	431.801
66.8135	103.261
70.6937	221.695
80.7238	73.2338
97.9219	115.261
94.189	101.307
171.989	111.793
151.722	57.4275
105.926	337.159
76.7327	219.313
84.0814	85.5119
90.2943	157.875
52.3492	236.075
69.7617	227.012
104.363	103.687
165.718	140.721
74.8376	52.5848
94.3723	47.123
73.3235	152.994
103.802	102.741
71.6334	179.16
95.0368	139.878
162.616	195.412
143.596	155.856
64.7417	121.207
158.311	97.5356
148.635	600.923
62.6441	311.951
42.0942	100.359
193.212	90.749
161.194	203.851
92.4854	129.098
105.025	115.976
67.9605	75.178
46.8669	554.24
146.14	278.02
52.3889	360.907
142.092	59.7015
95.2758	94.2738
19.0659	272.223
55.6875	119.089
136.389	120.83
66.3087	294.558
188.59	57.4538
110.453	168.2
52.5663	222.871
99.4063	108.841
61.2052	397.739
41.9702	199.594
29.5323	93.2719
68.5169	37.2233
44.8729	197.561
144.044	76.9957
66.1253	91.6707
183.315	117.415
155.346	293.106
117.086	106.6
66.9499	138.437
250.235	83.893
101.308	39.0631
144.736	32.4959
215.856	51.972
29.2726	62.5899
136.493	184.829
121.906	102.478
115.954	118.805
207.158	32.4462
84.1271	96.0408
50.5501	406.83
63.9361	152.97
145.303	77.8563
57.7439	52.1583
150.039	81.0959
103.362	238.283
110.994	201.353
113.388	292.013
38.9726	42.2787
123.588	169.185
116.848	73.7812
66.1773	100.507
43.1358	80.659
94.5922	87.7982
154.798	100.076
101.4	87.1078
61.2035	70.7536
134.606	97.8932
102.495	101.882
97.2652	168.957
132.961	93.0427
48.399	275.661
49.8651	119.766
251.708	84.04
62.2123	218.453
153.072	201.076
157.27	185.903
115.27	116.744
56.9362	42.054
91.6407	13.2672
148.435	36.1421
77.9073	63.3249
101.256	104.815
356.98	118.054
128.137	92.8638
223.454	50.7806
55.2635	52.6328
60.8178	86.8447
116.437	113.805
61.7158	142.534
261.068	152.987
323.305	93.3077
85.8301	68.971
95.3248	158.208
155.238	296.846
38.8906	84.9272
70.7603	41.2729
152.038	44.4923
68.9628	259.476
76.0234	43.2244
35.1856	98.8669
468.854	122.181
202.249	332.467
147.583	96.6342
142.391	161.428
108.903	334.437
115.707	302.218
83.3484	77.529
212.071	159.415
132.181	92.6509
114.306	176.221
86.3073	46.6276
119.395	31.4613
186.856	784.92
54.9308	211.939
168.017	139.553
87.2241	76.1441
98.7586	41.0001
157.247	99.6208
162.509	202.781
229.436	69.1165
94.7852	201.937
80.941	77.2667
219.385	197.412
103.01	88.8394
56.6514	64.3038
54.7897	209.152
68.6032	94.5576
64.0603	62.7966
87.3385	72.5107
88.7958	64.3746
130.647	108.062
56.131	79.0842
26.059	33.4051
125.034	119.544
38.5849	115.121
167.187	78.1688
70.9231	110.843
388.556	266.745
76.5507	48.7371
67.2674	84.7835
100.631	73.1399
58.7852	81.5908
116.496	192.856
181.103	113.319
65.1568	115.716
106.523	157.428
70.6858	77.6328
44.1335	430.216
47.0253	643.965
102.884	97.0195
40.7982	258.103
249.948	93.2997
72.579	715.034
120.016	234.709
109.701	339.342
256.488	389.577
53.083	188.245
121.398	110.837
94.0276	84.6279
152.189	90.6874
76.0829	92.9329
44.9908	61.9266
223.087	408.838
108.472	101.406
34.2796	224.881
57.3068	154.358
98.8317	66.2856
49.6566	46.9881
78.0339	270.666
33.1777	37.3942
74.9199	80.7286
110.02	34.853
38.7064	73.0743
74.2373	222.201
64.7727	196.401
81.7606	143.904
117.09	120.202
74.4779	93.3414
64.6115	302.13
62.4525	70.7576
96.1486	37.1787
50.6463	133.37
53.8335	135.187
131.558	102.398
64.4043	78.9152
57.0426	105.843
76.7784	168.176
54.4022	170.759
145.112	69.8428
130.493	75.0409
160.274	154.566
220.903	68.0174
270.104	106.852
132.461	98.1381
150.095	52.2426
181.751	173.689
127.054	122.214
91.5409	58.3584
72.636	83.8304
445.863	161.922
101.67	98.5496
52.2448	104.985
127.082	259.427
33.4598	109.222
136.926	203.232
114.791	108.18
64.9208	234.771
159.954	110.234
81.7792	64.3317
27.8186	157.744
134.314	60.8588
162.518	274.146
209.929	59.2612
219.556	133.855
153.898	143.397
186.696	101.805
62.6429	75.889
149.608	326.451
59.7739	133.853
89.5899	239.152
79.4156	181.607
108.985	101.32
42.2421	119.192
155.513	78.8582
59.6305	146.042
55.6832	102.22
118.468	102.126
122.679	113.737
163.807	86.8918
62.8907	266.842
165.669	120.395
69.6187	121.392
127.905	85.3566
62.0148	142.382
163.666	194.138
165.039	149.388
359.005	316.903
117.2	246.466
65.6187	150.159
37.9626	86.7925
114.175	120.898
105.642	67.0523
79.957	48.2809
107.266	81.6087
80.6629	135.241
162.999	99.4271
117.864	403.122
123.155	53.7293
148.484	115.657
114.884	40.2566
20.1513	90.1097
153.811	52.931
116.965	83.9348
196.708	104.287
86.4565	126.668
170.514	63.7202
56.7633	240.346
174.028	157.344
105.765	72.7994
62.6157	625.925
43.3063	124.127
86.7492	96.2234
32.1765	64.1537
151.161	153.664
116.966	85.9383
43.9214	116.965
43.7236	97.3892
82.6948	61.0708
101.736	76.586
31.2433	171.85
127.478	113.43
108.787	150.179
67.3631	50.8299
49.8903	89.8858
122.977	344.378
129.861	62.7198
73.0576	168.859
142.912	81.4691
66.2885	143.713
54.6239	288.731
134.439	113.157
72.6346	78.0547
103.86	207.068
86.5944	57.7618
65.1554	227.657
103.032	374.02
144.686	84.4175
89.0258	70.0173
66.7818	323.426
161.346	225.223
116.754	236.289
180.291	69.9776
137.784	191.524
88.1129	513.794
39.9401	365.871
106.559	123.829
109.712	36.7702
66.8741	69.8907
35.3077	407.02
75.4881	156.152
56.4658	41.9176
70.9567	163.54
70.3969	80.236
185.957	76.1404
208.267	109.614
118.205	89.8085
79.6937	237.567
106.974	46.1397
62.5138	135.207
61.1249	775.435
88.3048	41.075
134.421	38.9491
101.829	80.7047
75.2635	118.939
164.058	54.2788
52.3057	165.341
212.845	138.303
68.9845	113.792
105.521	164.446
61.1958	56.4169
282.301	66.9175
128.762	342.982
159.15	51.3411
196.682	109.679
96.2594	127.467
140.88	119.728
104.755	367.046
54.6523	96.1652
146.307	74.684
17.8874	104.562
103.905	54.4488
67.5454	118.288
157.305	136.005
164.725	86.8153
122.546	81.1569
54.0405	68.6927
52.7401	77.7221
50.586	171.69
118.778	99.0317
106.709	330.979
95.745	385.137
20.6348	170.155
122.926	109.755
82.8336	193.004
91.8282	92.0643
143.086	258.213
95.6837	221.761
84.1053	558.228
99.4783	64.0345
196.135	75.2514
66.0475	98.0988
65.671	107.399
312.651	237.735
90.9001	88.1472
139.95	64.8575
69.5863	38.3698
52.6525	186.266
106.642	84.4346
59.2601	68.3276
39.615	157.247
69.7613	65.0904
137.695	62.8873
58.0531	87.8208
191.846	97.9415
124.857	124.794
58.8387	69.2862
48.2282	190.374
111.426	100.798
156.313	53.1999
38.6985	66.811
151.789	115.308
45.5992	122.302
93.0349	104.723
54.3201	75.8525
65.1439	43.1088
75.2964	94.6411
67.9042	143.75
115.574	118.703
128.515	332.873
52.3713	77.036
79.2167	38.8038
113.483	84.4697
122.506	111.939
104.435	42.4404
41.9211	504.466
169.606	176.06
96.0306	110.365
79.8628	92.4486
133.607	119.938
92.305	91.0964
24.0845	121.209
55.8027	218.724
150.815	91.0373
97.3943	119.539
107.571	59.322
173.959	101.286
97.3142	222.3
77.6535	222.592
48.9162	153.735
86.2914	116.656
73.3569	90.3198
52.96	112.557
82.539	140.022
236.985	58.3961
94.895	90.5432
97.9432	201.066
43.2682	46.9668
81.2691	42.0529
218.32	217.7
146.444	142.684
172.438	91.6601
130.453	106.41
132.441	95.3471
44.9206	172.264
150.084	361.075
67.1666	254.153
49.2839	130.289
79.6209	202.072
98.0261	382.847
156.84	69.9011
35.4167	94.3913
282.142	120.423
130.187	572.923
135.803	105.971
124.171	579.787
117.273	77.3986
33.6939	184.701
67.236	308.272
96.3589	127.636
110.237	165.055
30.4845	102.904
36.6972	251.261
127.24	116.33
32.142	63.7405
51.0313	72.6819
47.9718	85.3868
136.661	104.598
128.377	66.6647
66.695	46.7177
190.391	120.658
70.3413	195.334
49.5717	331.771
215.939	341.295
95.4766	108.571
10.1182	348.775
51.0216	143.666
56.5823	138.866
8.61528	95.4264
97.7859	115.556
127.547	399.792
58.8206	251.107
245.56	107.505
74.3636	156.65
12.3624	115.155
11.3577	103.43
26.0953	164.468
102.376	126.502
16.3151	66.9484
83.9744	115.495
98.0681	294.379
16.0375	348.896
129.181	71.3392
108.321	151.597
103.449	532.388
125.082	132.696
87.0958	99.1529
129.788	180.989
133.71	77.9289
33.3684	201.028
23.1849	429.719
139.961	292.751
124.695	88.5026
51.6401	206.257
48.2805	79.8163
19.1065	55.4479
21.293	73.7741
70.4148	76.3302
109.464	119.996
56.706	320.59
125.716	99.0269
33.6757	73.1212
25.1025	543.07
49.6649	163.469
87.7899	89.9218
169.195	230.554
72.8956	113.408
24.3474	138.428
70.5903	124.742
68.4227	49.5877
92.5625	97.741
33.9147	31.2803
27.1555	205.827
82.1712	92.304
65.5821	130.631
110.785	87.4055
53.2466	193.893
15.346	267.213
87.713	41.5764
70.9981	115.102
114.895	110.385
72.7564	96.5902
23.8798	156.128
26.1082	206.375
26.7585	83.3386
133.659	86.7491
118.472	98.4933
117.468	41.6788
93.9805	41.8058
52.9436	537.779
23.649	290.943
138.839	366.068
41.2855	153.036
13.5778	84.8829
49.8477	91.2797
118.583	103.133
52.6879	102.42
61.0364	86.6827
52.0248	212.334
117.884	182.613
86.8379	93.3807
24.8561	122.258
120.095	226.747
159.105	90.0551
111.632	119.764
114.929	112.378
59.7643	88.7997
140.8	297.387
133.825	406.176
25.2561	99.2393
22.7477	91.8632
97.3124	119.457
40.4462	248.154
74.3618	171.559
86.28	71.6804
120.773	258.386
117.52	218.561
62.5404	257.147
66.3445	259.761
82.6334	229.148
13.4303	117.098
89.3386	128.331
14.399	149.839
169.781	281.986
10.0858	117.354
92.7023	147.14
27.9359	53.757
101.143	241.89
94.6821	102.396
28.414	96.6114
31.7341	394.925
143.688	171.488
45.4991	276.567
85.8553	260.545
147.028	188.374
49.7986	262.622
29.507	43.9514
54.538	68.6095
72.9985	218.959
217.622	191.998
20.68	171.286
38.4073	134.467
44.9961	267.868
54.3098	99.112
102.322	206.7
135.265	165.552
15.3776	51.3154
65.7924	117.932
53.2959	84.0543
121.798	120.005
65.6214	231.633
132.181	91.0982
70.3165	202.857
43.3102	192.367
40.7553	162.674
18.0319	100.443
66.5363	160.08
65.0721	94.7507
26.0494	78.0715
26.7229	98.173
21.7562	207.818
60.0437	104.469
37.8378	101.522
22.5822	110.843
115.739	86.4895
129.927	109.286
78.7142	47.661
[truncated: 155,613 more rows]
