# Supplementary material for: High-throughput, single-particle tracking reveals nested membrane domains that dictate KRasG12D diffusion and trafficking
Source: eLife journal article supplement (doi:10.7554/elife.46393), 2019-11-01
Supplement: supp [file elife-46393-supp-v1.zip › elife_poa_e46393_Figure_3_source_data_1.xlsx]

## Sheet: figure 3A
time interval (min)	max g(r) 12 ms: immobile state	max g(r) 12 ms: 2D HMM
1	2102.93	1.1337
5	856.1	0.8926
10	525.714	0.8742
20	316.249	0.8648

## Sheet: figure 3A - inset
r (nm)	g(r) 12 ms immobile state: 1 min	g(r) 12 ms immobile state: 5 min	g(r) 12 ms immobile state: 10 min	g(r) 12 ms immobile state: 20 min	g(r) 12 ms immobile state: 2D HMM
0	0	0	0	0	0
10	2102.93	725.66	504.012	313.068	1.13373
20	2082.12	856.1	525.714	316.249	1.02756
30	1864.3	544.282	394.983	250.124	1.00166
40	1123.92	414.389	359.932	206.495	1.00995
50	721.134	300.966	266.651	155.284	1.00931
60	466.022	272.225	215.949	123.542	0.981761
70	323.901	201.906	183.715	103.153	0.957627
80	251.321	141.657	148.837	81.8108	0.91507
90	152.005	111.263	109.523	60.3883	0.91879
100	143.583	98.7763	98.4439	53.5893	0.920463
110	111.376	78.6698	79.3576	43.7467	0.903144
120	86.3911	71.3352	72.416	38.8626	0.89069
130	70.3708	48.7544	49.0155	29.0583	0.893177
140	66.6734	50.5931	45.7406	26.795	0.859309
150	54.6105	36.7894	45.6138	26.3602	0.865032
160	49.6296	41.6004	45.7003	25.9871	0.858501
170	42.5419	29.4164	41.2872	24.1331	0.860658
180	51.3884	32.2206	37.8745	22.6482	0.860378
190	43.4694	25.5604	32.1387	19.6303	0.844299
200	33.8021	20.9545	28.7541	17.171	0.857704
210	28.3188	19.1981	22.4092	14.0444	0.85117
220	20.691	14.7285	22.764	13.5061	0.845564
230	30.6314	21.0095	23.1885	14.0228	0.858114
240	17.3686	11.0132	17.3401	10.1067	0.856756
250	11.4697	17.9947	20.8081	12.1183	0.853783
260	13.1863	18.7749	16.9596	9.89701	0.841549
270	12.9103	11.065	15.1945	9.21489	0.853594
280	13.3174	14.815	17.1945	10.2723	0.848262
290	21.9706	12.8993	13.2959	8.73777	0.842692
300	10.7922	10.2712	13.611	8.08735	0.846903
310	12.4827	7.74059	11.244	7.26584	0.843803
320	15.652	13.9946	11.0995	6.96563	0.855595
330	8.794	6.58477	9.34298	6.29386	0.851396
340	8.33871	10.39	9.9725	6.66066	0.846245
350	9.1662	7.00772	9.4711	6.33854	0.849007
360	7.54172	8.73987	8.05909	6.1023	0.851243
370	7.76649	9.50135	8.99952	6.58217	0.847555
380	9.73423	10.197	9.30449	7.22007	0.856714
390	4.61085	5.10242	6.70725	5.44619	0.857722
400	7.07854	10.8769	8.05186	5.98389	0.854655

## Sheet: figure 3B
time interval (min)	max g(r) 12 ms: intermediate state	max g(r) 12 ms: 2D HMM
1	310.97	1.3865
5	128.095	0.9277
10	98.2096	0.8887
20	68.7672	0.8812

## Sheet: figure 3B - inset
r (nm)	g(r) 12 ms intermediate state: 1 min	g(r) 12 ms intermediate state: 5 min	g(r) 12 ms intermediate state: 10 min	g(r) 12 ms intermediate state: 20 min	g(r) 12 ms intermediate state: 2D HMM
0	0	0	0	0	0
10	310.97	128.094	98.2096	68.7672	1.3865
20	280.925	124.425	95.7709	65.2434	1.15175
30	249.095	110.451	84.8411	58.2962	1.16635
40	202.945	95.8015	73.5338	50.1801	1.13223
50	158.638	81.1658	62.92	42.0733	1.21258
60	127.021	67.0365	52.0915	34.3436	1.14602
70	99.157	55.0047	42.1134	27.379	1.06171
80	73.6213	44.0618	34.1956	21.7128	1.04371
90	55.7696	33.0799	25.7741	16.4583	1.00161
100	44.167	27.5192	21.2748	13.1086	1.00755
110	33.0285	21.7321	16.9942	10.3945	1.00627
120	27.2258	17.7525	14.0392	8.55808	0.956419
130	19.9654	14.393	11.9599	7.19785	0.950943
140	19.8735	12.5009	10.3049	6.28063	0.943963
150	15.626	11.1361	9.43663	5.67599	0.904928
160	14.4934	9.94775	8.66566	5.21687	0.866751
170	13.6996	9.02913	7.87822	4.76662	0.8623
180	12.1347	8.23904	7.42022	4.5685	0.869279
190	9.76518	7.24079	6.54974	4.13646	0.910931
200	9.30963	6.68727	6.11887	3.90004	0.850281
210	8.17618	5.73394	5.26261	3.44293	0.858118
220	7.63805	5.65869	5.01321	3.38419	0.852851
230	7.46269	5.31123	4.7619	3.21367	0.884838
240	6.93695	4.8108	4.34423	3.03634	0.864394
250	7.33151	4.87424	4.26318	3.00715	0.882811
260	6.4155	4.51422	3.7781	2.75857	0.848768
270	6.05509	4.05176	3.5401	2.64218	0.869163
280	5.62383	4.00705	3.46036	2.57087	0.850169
290	5.87045	3.87668	3.19439	2.47105	0.844741
300	5.49864	3.67619	3.08329	2.39566	0.858631
310	4.98767	3.47821	2.96208	2.32148	0.869961
320	4.6949	3.31761	2.82617	2.29826	0.842752
330	4.38503	3.2314	2.70719	2.17653	0.86165
340	4.23698	2.92613	2.65492	2.19269	0.878848
350	4.28494	3.04748	2.60109	2.17265	0.838404
360	3.86534	2.86509	2.54706	2.11797	0.831103
370	3.64264	2.90963	2.45873	2.07591	0.849614
380	3.74776	2.83837	2.39276	2.07105	0.833653
390	3.71998	2.80137	2.40737	2.04052	0.859513
400	3.14735	2.69617	2.28084	1.95547	0.842498
410	3.21995	2.65408	2.2942	1.93311	0.847428
420	3.19976	2.55057	2.19789	1.89944	0.828872
430	3.09573	2.56554	2.19346	1.88043	0.84474
440	2.97856	2.43335	2.16526	1.8455	0.846583
450	2.72607	2.30987	2.04623	1.80348	0.847897
460	2.88971	2.32496	2.01196	1.73927	0.862882
470	2.90884	2.19987	1.92706	1.72406	0.856843
480	2.72493	2.09091	1.86882	1.66025	0.836492
490	2.6518	2.01977	1.83992	1.66923	0.833076
500	2.40902	1.92571	1.78261	1.62379	0.846406
510	2.53377	1.9525	1.81024	1.62165	0.839025
520	2.4358	1.90411	1.72899	1.57492	0.852574
530	2.08783	1.85545	1.67526	1.55023	0.857844
540	2.22133	1.86944	1.71751	1.57272	0.83987
550	2.08658	1.81138	1.69866	1.53994	0.822827
560	2.33782	1.78645	1.69536	1.5355	0.844121
570	2.18659	1.77943	1.66441	1.53457	0.844534
580	2.264	1.7433	1.59763	1.48702	0.829321
590	2.14466	1.78591	1.64514	1.51886	0.825188
600	2.26221	1.72412	1.59967	1.48895	0.843093

## Sheet: figure 3C
time interval (min)	max g(r) 12 ms: fast state	max g(r) 12 ms: 2D HMM
1	8.7088	1.3762
5	5.6047	1.0135
10	4.4425	1.1648
20	3.9545	1.1323

## Sheet: figure 3C - inset
r (nm)	g(r) 12 ms fast state: 1 min	g(r) 12 ms fast state: 5 min	g(r) 12 ms fast state: 10 min	g(r) 12 ms fast state: 20 min	g(r) 12 ms fast state: 2D HMM
0	0	0	0	0	0
10	8.30169	5.60466	4.44255	3.95447	0.870865
20	8.69334	4.7427	4.09253	3.74445	1.35983
30	8.7088	5.06109	4.19541	3.68143	1.37624
40	7.49292	4.4593	4.00905	3.51171	1.0419
50	7.38331	4.23196	3.68436	3.25298	0.783847
60	7.82439	4.07964	3.46755	3.06669	0.784589
70	6.17894	3.49083	3.19884	2.8037	0.887769
80	4.96335	3.15041	2.89854	2.5988	1.14648
90	4.73504	2.93878	2.64081	2.34518	0.988412
100	5.17687	2.73681	2.39022	2.17761	0.767008
110	4.61902	2.59676	2.26827	2.10191	0.798294
120	4.5003	2.38172	2.11138	1.94648	0.796678
130	4.27588	2.26774	2.05741	1.87676	0.87297
140	3.75004	2.23931	1.92153	1.80151	0.753962
150	3.38943	2.03143	1.85712	1.73999	0.747902
160	3.46775	1.99998	1.86466	1.73406	0.743643
170	3.32879	1.95481	1.7278	1.65394	0.789206
180	3.7662	2.10206	1.78043	1.68099	0.880467
190	2.98567	1.89979	1.68485	1.62474	0.822268
200	3.46273	1.82562	1.67007	1.58922	1.34983
210	3.04394	1.91005	1.67564	1.60187	0.96784
220	3.29215	1.8909	1.68356	1.57564	0.744437
230	2.74995	1.86256	1.69924	1.61933	1.06262
240	2.65429	1.74949	1.61863	1.55874	0.82351
250	2.87668	1.78384	1.62333	1.55531	0.817951
260	2.82306	1.70149	1.57925	1.53409	1.14918
270	2.53887	1.70585	1.6061	1.53908	0.746234
280	2.62511	1.67957	1.61483	1.53243	0.717404
290	2.60448	1.70613	1.57955	1.49963	0.877306
300	2.66885	1.64189	1.5919	1.51308	0.874159
310	2.45169	1.62801	1.52721	1.4773	0.847447
320	2.73753	1.69273	1.57045	1.51274	0.759307
330	2.48649	1.63222	1.52485	1.48945	0.815619
340	2.4464	1.59003	1.50522	1.47638	0.717636
350	2.30461	1.59185	1.47791	1.45493	0.804597
360	2.14781	1.53028	1.47204	1.43243	0.749097
370	2.33096	1.56147	1.52672	1.46352	0.896588
380	2.20089	1.56721	1.46634	1.44759	0.948738
390	2.35165	1.58563	1.53324	1.47244	0.856412
400	2.26779	1.53404	1.52016	1.45897	0.788571
410	2.25562	1.61506	1.49026	1.46085	0.823807
420	2.1494	1.55878	1.46968	1.42374	0.760229
430	2.21302	1.54567	1.48173	1.4414	0.783606
440	2.2561	1.52871	1.47293	1.43336	0.747167
450	2.03832	1.53049	1.45538	1.42466	0.801728
460	2.17078	1.55586	1.46177	1.41709	0.761784
470	2.13057	1.47135	1.47039	1.41221	0.741086
480	1.99721	1.47124	1.45375	1.39675	0.775144
490	1.85862	1.47366	1.41188	1.3954	0.796547
500	2.03029	1.50523	1.44218	1.40977	0.937934
510	1.89304	1.48421	1.4271	1.39657	0.758707
520	1.86402	1.45139	1.40256	1.38944	0.809161
530	1.88017	1.46935	1.41412	1.38816	0.847274
540	1.85896	1.4517	1.40669	1.37849	0.730352
550	1.76431	1.41103	1.40638	1.37374	0.765714
560	1.78755	1.43189	1.35831	1.35095	0.759942
570	1.73465	1.48801	1.38712	1.36499	0.882802
580	1.67262	1.3856	1.37796	1.34713	0.751474
590	1.77244	1.41948	1.3798	1.3614	0.769114
600	1.72058	1.43499	1.3594	1.34984	0.813475
610	1.69889	1.41015	1.35883	1.33935	0.881453
620	1.69455	1.39408	1.37116	1.34874	0.788703
630	1.7564	1.44133	1.37171	1.34816	0.849023
640	1.64976	1.37639	1.37127	1.35361	0.799577
650	1.59269	1.37764	1.35525	1.32881	0.895651
660	1.64527	1.35332	1.355	1.33155	0.799082
670	1.6235	1.38026	1.34074	1.33559	0.825734
680	1.66902	1.3864	1.3456	1.32675	0.767686
690	1.58484	1.38309	1.35779	1.34324	0.819481
700	1.54496	1.34427	1.3377	1.31652	0.763958
710	1.62662	1.36513	1.35081	1.31971	0.746459
720	1.5974	1.36429	1.34056	1.3223	0.829453
730	1.54413	1.3484	1.35748	1.32722	0.831183
740	1.60181	1.35373	1.33172	1.30477	0.920619
750	1.54558	1.3356	1.33624	1.30392	0.822549
760	1.61998	1.36311	1.34451	1.30815	0.802263
770	1.53096	1.34406	1.31767	1.30256	0.816939
780	1.50081	1.33433	1.31172	1.29512	0.845876
790	1.56713	1.35829	1.3255	1.30089	0.814196
800	1.50809	1.34982	1.3295	1.2951	0.838181
810	1.51065	1.33032	1.3046	1.28406	0.834226
820	1.52443	1.35998	1.32474	1.30123	0.756128
830	1.496	1.29266	1.28807	1.27893	0.782551
840	1.45767	1.30785	1.28878	1.288	1.04345
850	1.47727	1.33588	1.29225	1.28433	0.774004
860	1.52542	1.33648	1.30548	1.27739	0.86
870	1.42288	1.30875	1.29407	1.27799	0.857542
880	1.50358	1.28875	1.28257	1.27667	0.81695
890	1.44228	1.31838	1.29928	1.2792	0.786559
900	1.39556	1.29974	1.25976	1.26293	0.817148
910	1.39615	1.25648	1.27748	1.26572	0.95813
920	1.49307	1.31948	1.27681	1.26915	0.816796
930	1.4085	1.29382	1.2812	1.26621	0.853943
940	1.34035	1.26667	1.26316	1.24756	0.836591
950	1.36209	1.2902	1.28151	1.2591	0.787612
960	1.45803	1.28918	1.2672	1.25269	0.905308
970	1.40525	1.28561	1.26826	1.25021	0.758886
980	1.36646	1.2828	1.27337	1.2436	0.845892
990	1.4119	1.28683	1.28115	1.25524	0.878993
1000	1.41556	1.29498	1.25816	1.24854	0.832078

## Sheet: figure 3D
12 ms angle distribution: immobile state	12 ms angle distribution: intermediate state	12 ms angle distribution: fast state
103.455	74.8905	78.9523
30.9868	21.7883	166.299
131.48	84.8278	89.3056
51.5111	46.0478	97.4273
22.8536	53.0713	3.68835
72.4834	134.972	158.317
100.267	9.63567	123.379
9.45886	29.2881	165.339
15.3368	25.0169	177.811
60.5975	76.9888	95.6288
86.1389	54.5973	44.6463
26.0617	165.157	66.7725
74.3647	4.69264	126.809
156.716	110.527	82.0083
51.5763	7.3345	73.3514
133.288	22.7654	162.535
34.2556	48.821	54.161
63.2409	77.1264	155.795
93.6426	122.079	106.737
27.1473	6.71159	45.8069
152.563	53.4975	134.562
163.014	124.423	141.888
148.049	163.814	148.61
52.4939	125.033	144.046
59.6078	159.287	103.176
83.7485	0.846054	30.7582
15.598	129.218	65.1991
29.8066	48.0369	127.326
22.9697	34.8434	39.5249
17.6081	15.218	157.028
33.1178	106.579	173.395
127.228	92.0356	107.36
140.31	2.90617	26.8139
42.2778	4.88429	110.71
67.0565	43.7244	160.806
166.107	175.951	139.519
125.21	44.5313	79.8705
118.214	98.0512	174.12
146.155	54.1744	120.882
94.9022	88.9417	10.7406
75.6729	113.14	162.362
93.0828	69.8113	79.4766
98.9784	158.021	76.3191
64.9897	19.3346	106.225
29.6267	127.387	52.2086
90.5755	39.8644	142.411
47.9468	75.9708	11.2294
21.0374	54.8274	108.085
2.99551	69.8697	71.1011
51.3243	168.618	161.911
92.1022	4.62901	83.9515
62.7037	83.8182	135.926
107.163	42.3633	139.249
13.916	30.3185	54.1602
118.756	87.9835	177.923
109.984	85.2624	39.4344
128.329	31.4484	50.3161
6.22161	15.5357	176.786
169.739	51.6394	119.713
131.55	53.0418	17.747
15.7772	24.0478	38.9567
77.1365	33.8584	96.2948
107.872	11.916	134.893
44.1128	68.2261	67.3606
16.6456	122.871	159.587
25.5396	36.5384	113.608
71.5627	148.739	67.6973
58.6167	86.119	161.046
174.702	149.958	23.4104
131.162	24.6025	152.258
99.2129	77.9888	54.6337
42.0066	140.513	47.4436
165.357	80.1504	116.818
98.1789	150.856	76.0465
137.499	87.8349	113.758
52.7059	29.1736	110.622
93.703	17.6792	19.8519
116.545	116.087	130.043
81.4913	77.856	134.327
7.76433	113.91	85.5641
14.1288	141.96	120.239
137.607	41.134	72.9872
23.5345	118.025	168.444
29.4886	63.8159	120.941
142.896	18.6549	26.5488
23.9035	8.79695	51.9363
174.31	16.8765	107.653
49.3016	4.31467	23.6782
69.209	78.5496	11.0899
86.6101	104.552	45.3575
65.6919	76.4302	7.5558
108.584	35.9354	116.557
63.1859	160.946	35.5597
24.7678	111.889	92.8574
28.5974	146.939	151.154
140.418	5.63402	126.796
129.963	85.1802	9.19768
38.6085	111.67	112.654
8.99604	77.4468	44.1668
53.4138	27.7244	77.961
145.962	46.7359	177.755
38.1939	2.64456	12.0237
3.9092	20.6167	152.913
92.4272	75.4295	0.784851
37.2975	72.6727	87.8007
125.483	167.153	67.4801
2.7326	44.892	1.26883
26.5321	176.874	97.1309
12.3876	1.35277	162.211
167.433	172.479	116.323
1.92935	36.0883	6.16123
43.7652	81.0842	94.7013
4.07576	118.101	103.83
69.7477	97.6594	129.045
5.55444	0.35754	40.7904
23.2452	100.123	40.4777
3.35431	27.4468	120.242
69.9991	30.6123	14.1236
64.5851	173.958	2.65389
21.411	45.8904	96.239
165.047	95.717	53.7046
99.3575	33.4698	87.9416
47.77	32.7434	63.2687
67.5099	1.87131	96.3557
60.3389	17.8211	175.95
75.6743	31.9982	174.509
131.574	132.9	141.376
69.844	124.939	32.238
65.1773	149.982	100.605
49.7489	81.9467	113.267
34.0247	26.0964	168.349
32.2556	24.7111	42.7135
143.357	115.506	92.7326
30.2087	2.99172	7.5339
23.4206	86.1081	124.075
112.066	13.6926	149.64
49.1425	59.1526	145.472
10.6686	123.468	80.391
46.7244	87.4044	156.343
75.9267	147.071	179.232
43.0635	133.263	112.035
50.5447	25.2405	96.5243
132.65	55.3614	132.716
69.2877	52.0339	15.2269
115.423	4.08084	141.897
125.314	175.082	170.128
75.9326	85.7135	35.0324
22.1744	113.172	20.3477
88.6327	179.29	115.354
21.1062	68.933	111.546
34.7106	39.9792	88.8861
9.79247	53.6861	23.7726
146.917	147.568	39.6699
51.5644	20.0929	95.793
37.7566	10.7349	18.7251
42.2413	2.45129	141.755
0.215121	114.68	127.28
31.2352	130.099	132.778
5.68716	1.79528	29.3934
12.556	142.731	87.7927
129.047	130.904	39.3502
61.9285	51.2243	16.0329
98.4527	89.9614	67.9104
16.3612	115.454	114.523
31.902	100.639	42.124
43.5284	36.4416	18.5777
72.4923	116.683	105.042
2.96807	11.2691	29.5308
88.9735	49.3468	167.3
96.9958	172.869	128.356
66.5158	154.976	23.0239
44.8705	52.2029	155.383
29.2069	30.5392	46.7224
60.1874	179.042	52.2418
159.028	90.2032	92.8504
30.7539	9.90745	20.4974
88.8336	53.5908	146.701
16.694	28.9626	150.151
45.7425	142.156	174.261
58.5167	96.6644	87.9398
84.9167	73.4786	71.2315
78.8646	148.305	112.189
24.9314	91.4965	76.7492
57.3121	131.41	29.9281
75.2523	21.7072	134.12
40.5742	69.5016	55.905
20.7534	8.28251	177.157
0.725956	164.108	142.022
37.3562	51.4129	144.833
85.1996	163.512	144.908
141.012	44.305	71.1655
78.8176	166.191	52.0104
23.0492	20.1867	131.708
109.692	2.31056	29.7707
129.641	70.2567	54.0551
27.0042	48.0996	55.7454
155.235	169.815	79.7621
0.897432	162.858	139.933
159.663	28.0284	147.709
36.5376	170.476	148.638
52.7144	154.403	1.20202
123.43	153.592	28.8714
0.94862	30.6247	121.346
74.9192	44.6217	176.484
5.1296	48.424	116.098
99.5493	117.012	166.284
121.663	110.964	35.0227
9.17959	129.569	170.907
125.296	56.815	134.513
134.315	46.0118	130.544
168.955	106.706	67.1677
11.9678	28.1865	57.9416
54.5118	67.9331	16.7586
157.377	179.732	68.2286
35.1446	53.3347	130.428
158.908	64.3409	176.896
76.0028	141.23	104.861
63.3287	20.589	21.0598
17.7507	47.4379	160.331
128.391	131.771	150.307
70.4271	31.3508	25.2126
137.913	48.9705	68.5925
123.069	119.811	126.587
12.6345	95.1195	31.3727
86.5688	3.73172	147.914
115.685	59.4863	14.2306
47.3469	52.451	24.6821
67.3739	26.6694	76.9958
79.112	29.1314	103.946
29.9309	75.1384	132.552
113.514	11.2069	87.59
53.3439	95.2765	67.4632
52.4531	11.2484	77.7899
83.8234	33.5789	176.614
89.4216	55.814	12.526
44.1599	40.7824	43.3777
75.1535	40.2687	40.6767
78.775	8.76245	106.875
93.1953	56.526	47.929
71.6235	159.31	125.934
129.542	50.1404	132.286
82.9948	48.9991	13.394
106.078	91.5418	25.817
99.9692	168.601	22.6274
27.9769	127.501	60.6873
88.5465	30.1586	119.918
83.4024	42.961	125.401
19.0681	80.5646	68.9753
65.1606	130.041	99.4515
93.8176	139.729	175.474
104.653	0.416471	67.6493
136.091	177.369	108.207
128.555	29.957	58.1247
57.6972	124.145	16.7566
50.1624	109.711	172.985
166.147	164.085	108.692
27.7318	76.2798	151.153
61.0219	43.6545	166.026
100.023	44.1826	63.8402
74.3282	38.849	61.5368
56.3438	5.24637	160.141
39.2774	86.9804	85.4952
114.506	53.9717	71.6834
177.164	172.592	68.8404
129.485	156.956	141.701
108.744	32.2631	72.7419
114.276	69.124	117.492
73.3027	160.542	93.6248
17.1471	141.875	25.4253
133.666	130.468	163.789
12.9484	178.153	86.6888
5.89206	49.3071	52.2046
3.16582	96.7029	5.91427
176.545	50.3518	154.051
126.155	155.54	136.455
125.817	145.568	35.3057
112.551	27.6686	146.261
128.731	160.236	12.5626
108.751	61.4234	44.1983
154.165	154.932	101.355
76.8421	144.89	120.949
13.9896	109.169	141.099
23.2727	132.189	44.3678
41.3574	95.8522	133.932
5.87556	101.146	113.065
25.6184	12.9849	4.15114
69.7163	53.2725	1.41101
168.906	41.1286	9.04783
13.2257	169.761	80.066
67.2942	116.475	78.4346
78.9045	135.844	56.2364
80.6632	111.589	164.256
37.3587	114.539	43.7467
28.7385	72.913	24.7587
160.945	178.588	133.976
75.5762	177.943	9.70077
23.6628	14.6568	101.854
110.698	22.4599	103.672
22.7216	13.0086	107.412
164.512	15.2174	81.7945
53.0187	42.3533	46.5923
17.9658	8.63212	13.2079
167.103	12.312	160.134
1.43078	70.8537	26.7479
103.725	163.385	49.948
66.9073	80.3174	125.032
153.329	33.0156	129.558
139.379	58.2877	158.097
96.3303	172.445	99.3256
47.027	107.133	18.1405
171.479	26.8959	105.885
7.79733	109.541	109.719
51.0248	132.797	74.8504
155.034	17.3572	84.7715
69.8509	11.4089	87.5151
15.7247	41.6998	43.8049
114.483	142.728	111.892
173.072	31.2234	162.94
45.9903	140.996	58.8948
12.6033	52.098	169.264
173.246	121.635	63.1675
106.757	8.90218	110.44
24.1677	108.56	65.4964
56.6939	11.8092	86.7888
37.7798	119.187	21.5727
2.29911	8.31465	113.883
47.7918	77.155	10.0991
85.5026	110.564	22.1177
93.7739	71.763	173.811
2.64319	23.302	4.45402
169.046	169.103	148.331
6.65643	166.446	163.762
30.595	27.1227	22.5588
50.5501	42.918	113.265
75.0013	24.1745	106.93
19.5025	14.2025	95.2454
67.8743	49.7132	109.265
1.31497	100.145	66.1347
99.4738	16.0861	8.75324
5.02205	118.61	45.1145
20.3267	122.835	135.703
18.8624	42.3756	41.3941
28.5403	32.4505	75.9491
80.648	85.3126	76.2706
61.0525	43.2977	143.1
14.0051	64.6827	149.915
4.36657	117.978	135.908
61.698	161.177	96.563
23.9863	118.901	6.65036
106.132	110.709	72.61
84.8336	139.662	82.571
59.0451	17.5684	125.722
84.2503	2.78912	45.7432
153.785	80.1103	73.459
0.741615	30.598	148.814
66.8544	14.0705	2.69285
51.6203	98.5116	132.013
86.4521	87.2204	14.7681
82.6362	32.5284	142.7
9.10446	18.3252	178.921
126.052	157.315	90.1138
174.232	122.89	164.013
38.3494	21.9491	83.9226
141.644	24.7022	58.9667
171.626	2.26466	116.857
45.5593	99.0365	43.5071
122.693	40.005	168.044
16.7824	80.6707	24.4397
39.7099	40.126	21.3729
174.058	20.2885	5.90665
109.166	28.669	16.0564
38.2667	10.0892	145.633
114.115	34.365	13.5124
119.064	4.76385	90.1986
26.0182	90.4221	109.286
92.7284	86.7007	62.8853
18.7865	40.8218	79.2365
16.6845	164.643	73.0798
31.0777	160.827	150.15
36.1712	71.195	117.684
110.163	126.129	177.217
22.1496	48.0021	65.5742
88.1831	99.9549	132.724
79.8227	141.058	88.3504
144.828	101.784	28.0892
153.886	55.987	13.5971
21.0048	74.7517	167.337
142.719	114.647	179.093
41.7173	139.794	94.8616
9.72136	17.2328	157.925
156.496	4.82294	151.973
98.2728	46.8602	54.763
45.5477	94.1016	11.8578
129.447	173.819	30.9741
168.799	132.968	144.615
19.8173	138.426	101.523
176.621	97.1435	21.4963
60.0018	5.14843	123.811
89.1483	146.447	102.797
121.942	6.35671	144.718
92.2581	2.04121	103.594
77.4155	123.353	127.881
59.9719	117.562	178.999
125.717	16.5617	11.8541
85.5344	40.4467	102.445
134.321	30.41	38.3921
2.84092	86.8406	38.7515
4.22931	161.82	30.1203
101.174	163.76	135.667
1.61271	48.1655	53.0486
126.644	54.4208	144.801
4.60812	62.2532	35.7993
33.9826	176.014	107.424
47.3833	137.76	143.871
49.0548	136.176	169.444
30.7114	63.7568	105.875
28.3961	68.3657	79.0207
57.7021	142.711	28.7108
75.2154	74.5092	165.182
0.742465	150.717	125.927
164.323	68.8936	70.8748
62.2746	133.345	78.3058
33.8559	123.615	156.226
76.2909	79.5451	78.2967
61.9488	130.056	149.117
123.613	110.457	146.928
3.42442	24.8263	49.3994
152.326	30.9765	69.4317
14.4356	54.6338	30.3019
24.9592	24.8243	10.7618
120.875	45.7743	3.34635
66.136	129.666	75.7653
29.452	104.973	106.02
27.7414	28.6284	146.671
117.594	62.8621	11.8628
82.4524	30.5092	139.723
15.5156	92.0067	27.8
35.2108	65.7734	18.3046
42.8562	70.5987	46.1601
174.914	177.754	138.356
60.7833	75.0782	162.683
64.3928	125.143	67.7378
14.3423	166.875	72.6734
37.3561	154.291	176.764
49.6113	70.1887	144.938
97.0363	13.6383	120.775
32.4735	165.288	55.9259
22.8944	17.7191	160.594
10.9043	15.5336	179.518
163.355	22.5265	66.1015
41.3059	33.6621	132.099
21.151	134.141	99.0387
47.341	53.1671	157.454
67.2599	49.0835	145.073
46.2325	22.5237	164.173
127.701	82.3177	77.1636
53.8087	150.511	141.764
140.372	158.347	26.1685
10.595	162.92	166.836
110.445	3.21769	14.0546
34.0793	2.6685	123.187
9.82854	27.9652	14.8163
115.071	131.881	143.177
64.2349	113.861	142.702
51.2071	6.35045	44.8657
64.1967	85.9939	154.764
26.257	75.6511	16.3461
38.2705	98.2256	60.7491
147.136	30.9763	121.267
33.7437	175.155	121.382
141.729	70.2638	64.6673
28.9765	47.1147	99.5927
53.1143	172.361	106.094
10.5673	6.27316	169.549
58.147	80.57	45.5242
28.039	34.5851	132.468
142.507	71.4058	75.3353
15.8672	82.3791	124.971
154.47	3.47384	138.02
19.3598	59.4151	89.3351
34.8121	99.9828	80.5205
85.2501	171.01	153.438
78.8741	124.372	136.846
17.807	149.097	126.589
156.922	138.468	176.939
10.7049	66.7806	97.0672
140.305	55.4244	72.2977
130.422	100.702	7.0525
8.70039	91.1121	1.64386
69.0561	37.8341	8.57247
174.481	165.496	94.7322
3.37864	177.837	18.1225
39.9851	97.0091	107.47
65.2536	63.1362	62.8128
133.029	133.157	23.6043
160.658	147.186	97.0457
64.4911	16.2697	145.119
34.923	62.5138	134.317
13.3381	107.78	19.0557
0.220407	147.664	169.047
116.212	55.8672	33.6071
4.52521	165.964	147.261
5.03928	132.849	176.896
88.9396	175.941	119.836
108.76	144.506	143.502
53.6181	20.937	72.9368
7.26736	64.3611	39.3452
114.02	39.0503	100.232
45.614	32.031	156.313
70.0213	29.3276	162.217
12.2842	40.2844	30.2493
35.7638	22.5448	48.1098
159.18	44.535	8.75725
125.279	78.4738	106.478
50.1496	27.3733	113.909
9.03234	47.3628	74.8168
52.695	20.9542	113.374
150.981	39.2327	3.23106
16.7496	10.5154	169.228
29.9786	32.1976	104.296
13.2526	23.4896	12.2043
121.022	159.39	125.284
27.0822	57.9179	50.1076
4.56979	40.4567	21.8366
68.3501	46.1498	112.089
130.203	30.983	179.75
106.9	0.71479	76.7231
60.5554	67.9678	143.812
121.564	77.3493	15.5775
176.338	59.0879	88.0261
9.15411	37.3553	42.2612
21.1065	110.011	27.4233
32.1662	135.176	114.324
134.874	54.8245	44.6773
70.3193	140.953	135.535
80.5566	113.631	151.726
34.0951	65.8215	153.727
1.67548	151.165	129.025
19.0933	114.694	110.115
150.856	149.575	49.8084
12.7914	117.966	163.777
128.33	161.97	106.293
57.942	17.8077	67.0906
47.6975	138.529	83.8251
84.9803	60.3254	119.739
6.31951	96.2376	32.2168
29.9247	57.1951	32.3467
10.9074	174.44	72.9558
176.838	129.572	38.1961
79.5651	77.0299	56.6876
64.432	90.5856	155.858
104.086	80.6485	40.4074
3.93365	39.6082	9.02298
155.428	67.9983	144.809
88.2841	155.077	43.9189
3.81214	47.3441	66.6552
117.237	70.8962	159.076
136.272	78.1505	68.5456
114.096	114.687	5.77055
134.808	53.4182	138.231
142.648	12.436	178.236
127.453	5.67161	142.525
19.8509	144.666	13.2352
131.279	79.2415	179.876
0.718152	167.902	77.176
95.101	28.8286	124.789
135.872	156.926	117.403
33.2169	144.177	76.391
28.6608	56.3603	157.019
132.127	134.15	126.58
49.0915	121	110.125
72.7399	175.586	103.529
1.65619	139.734	11.8436
19.5712	54.1541	65.6874
44.5602	6.35248	133.611
19.2029	121.519	172.451
91.6468	35.0674	159.146
59.9384	82.8074	164.774
9.35272	26.4809	77.4935
159.037	51.8066	81.3291
121.579	44.3854	77.6164
77.0444	58.1856	38.6266
76.3562	18.0783	67.3318
13.2905	172.625	52.0071
65.2939	176.902	54.7287
32.9395	95.5758	80.178
0.54044	143.641	47.1234
114.759	29.7902	94.1733
143.836	21.6807	148.335
47.8675	126.147	147.167
16.6273	97.6099	104.726
153.621	128.542	40.2742
127.198	53.5063	18.1819
18.8381	3.74171	87.9139
83.5022	152.223	107.767
120.607	129.07	116.117
111.153	39.5391	16.2831
16.8971	33.4357	73.1899
36.9178	79.1423	175.946
87.3478	7.8426	101.62
86.0196	101.577	24.7821
10.2376	116.685	52.3931
1.23321	172.485	133.506
36.2352	106.286	150.151
46.8945	7.72478	139.824
144.849	94.3627	148.246
117.076	143.993	102.279
34.4106	114.628	148.986
113.436	40.4518	7.02465
58.9602	61.1681	5.79639
19.7992	163.612	155.686
99.9359	92.8215	147.549
45.0802	155.786	104.703
136.947	80.5374	27.7351
69.7191	121.24	12.7963
19.1086	31.1565	147.316
23.1314	43.4607	140.064
143.159	139.935	80.2567
130.898	42.1302	132.102
9.80954	61.6511	3.24987
15.7508	116.491	58.2782
131.113	148.321	144.52
124.144	152.14	0.609988
124.023	139.893	97.9461
26.8355	162.118	66.8785
135.968	63.2833	155.564
33.1887	151.317	164.616
151.743	2.16173	43.3688
5.86269	113.47	158.478
18.0247	39.0192	40.211
45.2666	94.1307	158.121
11.0261	51.6402	132.411
4.56729	134.856	85.8705
25.4087	45.033	77.3621
133.036	82.9247	170.223
22.9156	17.6933	138.824
3.50368	14.9205	32.2105
5.43051	146.298	38.4282
113.769	99.7764	49.3627
175.813	154.812	40.0615
139.741	159.296	15.3098
19.3308	152.346	111.619
55.528	23.18	107.855
50.6274	4.33633	144.889
24.3684	50.6544	145.052
106.077	38.6984	90.7425
38.8736	41.0755	28.2282
1.28801	53.5504	0.102685
12.1437	116.318	174.651
18.704	21.6867	85.7639
147.456	27.0397	174.255
137.209	140.323	143.802
112.375	38.1984	83.6119
111.164	89.659	135.241
97.2368	13.769	134.031
100.494	35.238	90.2908
98.0266	58.7618	45.5599
28.2598	144.201	166.468
100.886	128.2	85.3183
158.187	160.093	81.1142
3.13993	34.208	89.8422
79.2258	61.2274	178.692
49.8131	147.72	117.15
61.2998	18.1517	10.615
4.02687	147.506	148.494
6.18807	6.01933	130.307
63.8557	115.022	25.3905
49.6866	53.0532	118.573
110.206	19.8163	152.992
86.0584	50.5641	95.4405
113.42	5.75769	19.3994
77.0362	136.757	171.113
52.8902	24.1856	44.4239
55.8642	67.5517	137.322
94.442	6.0239	52.9411
48.7454	14.0497	138.224
13.8036	116.364	31.4682
127.882	26.4935	39.8523
16.3733	56.4156	43.3236
28.4447	20.7851	76.9038
33.4875	95.552	13.6056
125.333	11.2004	46.1926
7.50043	49.259	138.475
55.3807	56.2733	45.2506
98.7147	79.2805	156.972
62.1649	141.748	150.562
63.653	134.444	148.289
46.3511	106.734	101.364
30.8464	56.9588	51.0372
142.811	115.116	44.9355
11.7236	75.8412	77.5724
19.9894	106.128	77.2204
39.2518	90.1042	58.1479
48.0883	41.4312	13.2862
38.2876	149.434	40.0421
99.2702	38.0966	1.47977
62.0231	48.5193	23.1674
115.196	13.2194	151.851
25.0766	9.16953	121.747
24.8233	15.9507	142.157
119.88	150.053	12.8975
46.2315	24.7352	48.9949
24.9785	34.8486	123.135
105.789	69.164	44.2848
123.41	161.653	12.7394
27.6176	36.5439	45.4335
141.929	31.6979	169.019
44.8797	176.881	66.647
113.746	148.516	170.74
121.671	29.0176	179.478
87.8974	80.504	53.8794
151.793	118.576	164.358
101.058	171.204	132.469
109.782	6.53605	35.0393
77.8352	72.3779	91.1331
0.528503	35.4721	80.4501
54.4263	166.654	125.375
45.0633	118.819	4.07598
92.3607	19.7987	96.3679
150.369	72.7228	169.025
22.4548	123.609	79.1031
19.9571	7.03639	51.09
113.454	134.717	7.46179
173.371	128.634	152.409
99.8507	95.2378	179.909
18.29	5.96774	87.9715
60.1974	50.2238	58.9976
159.09	99.7978	153.795
108.946	118.327	153.701
40.7796	156.316	3.69837
20.5236	69.3212	12.4131
65.6288	57.6038	102.909
0.0697522	46.3028	143.972
59.0248	56.4219	148.063
16.9066	166.947	121.11
40.6941	128.863	7.45544
164.927	55.0738	107.749
158.357	37.8066	5.96847
44.0328	61.553	177.788
42.2049	66.8998	153.69
94.5461	97.5546	47.0981
151.993	62.0522	54.7
91.3078	48.0782	168.695
109.514	101.557	14.9099
141.418	93.3383	30.3088
16.637	68.7889	81.274
116.803	131.288	15.0068
8.94264	174.691	156.697
37.9053	28.0077	128.588
36.0711	171.403	121.585
65.3398	8.68465	155.792
11.9752	4.13929	97.1458
30.116	41.4744	70.5664
60.4758	170.091	96.5525
105.413	73.2572	132.445
128.408	35.5569	141.777
156.11	96.437	17.4475
29.0551	145.441	152.306
33.1191	24.7913	6.78217
125.52	127.553	133.794
0.519353	5.69992	94.056
150.29	54.7778	140.826
29.5253	37.6914	111.465
64.1963	151.97	61.6129
13.1689	67.2157	143.815
96.987	39.4876	26.0703
138.18	165.03	32.9761
33.2578	53.8624	42.1219
42.4521	49.584	4.68701
144.936	21.7572	168.81
135.827	127.534	148.822
40.109	63.0823	32.6259
131.168	165.484	56.6751
88.5631	43.2534	66.498
102.254	42.1735	149.649
111.702	125.444	0.902261
101.243	138.539	97.7111
52.0866	123.778	73.9533
8.74045	31.0803	162.577
170.859	102.978	144.337
84.3599	86.2792	122.418
109.666	113.735	159.397
84.3669	0.661114	14.9991
52.7484	28.9514	43.9301
22.8821	96.1679	165.143
177.076	118.005	14.7522
52.3341	19.1158	24.3593
88.263	29.3635	159.52
98.6555	35.3808	43.8058
52.9068	136.415	122.269
3.68491	43.7187	105.463
63.0756	131.487	165.805
161.797	60.9323	178.439
24.2391	6.59194	162.732
46.1811	123.522	103.051
65.4483	29.2737	129.818
14.0265	157.112	6.82336
89.5458	117.606	91.3982
51.6786	148.895	158.474
169.482	74.905	87.7286
29.6661	83.9162	103.467
55.164	107.612	114.112
43.2072	24.2854	11.5677
56.571	123.198	99.2025
40.7953	134.959	64.1927
146.132	28.5173	26.6266
15.3597	36.5578	69.1451
101.43	67.1993	146.084
65.7476	29.8498	15.6538
117.883	86.8023	99.983
6.97301	3.31257	132.304
92.8501	43.3518	52.4269
157.929	138.267	177.182
105.608	4.39441	4.16914
14.662	20.8875	73.5772
28.4533	177.74	16.6431
39.6587	15.5506	133.054
33.6499	115.811	60.8409
159.579	86.1607	168.668
19.2676	112.64	50.2372
54.0492	146.353	80.7747
78.6676	20.0171	74.1044
16.5164	60.5545	120.954
34.1943	7.40319	51.555
69.9392	28.9666	153.115
60.6582	158.858	15.1444
103.808	7.24352	138.384
118.697	58.4072	89.4553
48.6438	45.0855	25.1523
2.01803	41.2536	58.8331
29.8369	90.6079	155.319
58.9853	103.094	105.106
11.5541	146.825	152.798
89.7125	177.054	168.556
11.0914	69.6432	140.36
54.6731	74.9125	47.1568
121.698	27.0379	123.958
27.764	27.2922	135.987
30.8958	124.316	27.9397
176.983	134.652	79.7856
34.8991	66.0586	71.1962
44.889	138.636	150.299
87.8153	76.8392	155.071
162.282	164.575	28.5921
137.088	2.62665	134.41
110.652	111.645	110.986
52.4485	62.2789	91.4921
71.8965	64.3491	34.2204
142.791	154.691	88.6298
68.3765	12.1294	172.848
138.449	17.8691	90.3294
5.31973	3.46799	142.652
23.861	26.3421	165.762
12.2342	31.659	31.3425
99.0614	54.7945	44.1432
21.6839	30.0916	15.2072
140.338	41.4623	57.3475
103.281	31.2783	8.35819
66.2948	34.977	100.256
0.487792	5.76573	172.359
108.913	65.2382	14.575
57.6416	16.4706	162.036
96.0048	71.3306	158.136
44.4799	68.326	179.197
30.4918	53.4984	123.481
55.6637	130.471	91.8066
39.1177	22.4183	4.68173
55.8651	102.08	104.107
140.238	77.591	111.616
133.032	17.1501	21.695
154.637	33.6692	139.481
1.94784	22.8945	9.76455
126.971	116.468	2.84697
28.3308	132.533	47.1381
59.1223	5.74279	41.7241
14.5755	27.7379	0.558999
75.9631	178.153	142.679
73.1477	54.4176	163.803
82.7129	127.462	120.211
47.4992	69.6563	160.49
1.69237	86.7142	95.3929
68.9296	8.78454	0.109467
18.4738	124.513	105.253
41.144	93.8846	107.235
149.89	5.27253	67.4729
1.67477	72.0017	66.2047
88.5567	142.735	159.223
100.065	75.4322	60.0653
160.523	110.942	139.607
6.9829	83.8577	104.395
90.3597	66.4707	27.6925
172.272	84.8798	93.6625
139.662	158.335	58.8327
12.2613	50.6987	162.894
126.015	9.00995	38.6946
15.4109	112.382	53.857
141.506	59.0866	151.344
41.4076	114.234	63.3754
110.69	38.2943	145.2
101.643	6.16546	60.887
13.8557	61.8505	178.552
55.1527	36.0351	58.1335
174.924	77.9783	129.189
159.56	156.509	15.8023
41.9926	124.408	25.9829
7.60054	90.4603	167.303
114.257	48.3048	28.7225
4.86443	174.301	155.882
38.4506	120.109	165.518
79.4544	22.3135	149.545
81.7078	69.5244	64.8602
33.2754	122.762	24.6794
107.923	29.0937	167.042
116.651	54.3517	42.6513
116.31	145.99	102.944
1.69091	70.4699	84.7317
118.333	142.106	88.9488
92.8345	48.1912	100.989
22.0395	176.984	68.9713
40.1593	43.6054	8.13741
173.962	84.3537	160.929
30.143	171.389	143.901
75.704	50.622	48.2668
16.7708	3.88319	155.425
139.301	121.673	127.368
37.7609	137.461	143.647
34.7147	148.195	65.8643
144.453	97.8239	126.659
20.9886	88.1957	59.2571
10.6261	135.627	167.535
101.986	68.2106	117.037
54.5832	67.1802	155.856
17.9066	101.423	14.3371
113.952	4.38188	111.077
58.5506	118.336	35.3673
108.904	114.903	3.63341
42.4215	64.806	120.862
8.03332	23.1394	165.818
38.154	139.148	54.3374
56.2533	153.048	37.0807
122.795	49.7238	53.0979
57.2209	96.2688	75.8721
10.274	111.258	29.5802
92.8107	111.648	151.598
95.2423	121.764	8.04223
73.0269	59.9249	86.6752
69.9589	39.48	129.53
111.711	29.3061	171.21
0.606333	37.1149	126.61
24.3116	39.9319	109.139
135.445	25.3386	9.69044
27.3686	147.389	39.4494
45.4804	89.9074	131.7
91.6831	130.723	126.676
4.31811	48.3159	22.8606
13.6841	64.7121	57.0638
106.173	171.928	73.8818
14.7144	24.1038	102.769
160.659	72.2573	171.812
70.302	7.2354	74.4834
42.7176	159.588	63.8974
157.314	4.5863	134.319
41.2402	179.039	61.8904
68.3012	85.3628	18.4118
44.9623	124.125	35.2468
124.387	98.6039	149.223
30.9664	60.8011	107.053
13.3046	50.2156	150.02
66.4297	171.696	29.5904
16.9759	157.976	4.81409
117.096	153.167	150.801
58.4478	64.4888	7.96504
48.6034	65.4872	81.0096
107.47	101.082	100.105
3.09849	31.8225	177.156
77.8313	44.9711	79.8851
37.917	39.5991	119.911
47.0324	21.7197	69.2458
52.8788	123.385	4.30897
149.76	48.1817	176.381
117.175	177.162	112.349
100.55	55.3248	178.828
0.358784	108.95	134.614
86.3452	81.4641	79.1855
93.564	157.305	3.21658
81.7642	30.4209	167.583
3.37033	10.3609	4.90382
161.968	110.205	17.6317
4.60112	71.371	73.6933
142.41	104.87	27.5884
56.1296	24.1576	152.815
38.9171	66.1324	92.9392
24.4509	34.8337	160.779
38.7636	37.9563	101.1
19.2235	67.8403	32.8279
63.8604	142.008	1.03607
47.7457	89.3669	56.6466
158.901	41.2933	172.408
118.76	5.63558	66.0903
140.278	163.55	111.896
118.597	120.595	103.471
47.309	62.9697	60.259
127.811	56.6154	171.384
28.2187	98.0004	87.7383
105.696	37.0066	163.308
33.0821	55.4322	54.0262
91.0273	48.9196	133.687
24.4599	139.88	114.816
154.033	41.5386	132.191
52.794	124.118	131.128
55.4768	149.304	119.349
104.381	144.055	155.505
6.97297	133.397	123.538
7.06963	140.983	10.9696
103.773	131.904	37.6141
88.262	172.03	102.74
106.306	16.1265	125.275
109.672	32.0869	84.8005
15.4967	23.4054	82.2691
62.6622	76.5229	31.6349
37.2212	161.151	125.65
106.765	140.372	170.207
0.776473	114.006	49.1363
32.258	126.71	147.986
26.9331	105.443	86.9402
35.5113	8.87167	63.4682
64.2673	62.8733	42.1241
167.21	46.8363	50.732
5.11754	16.7225	3.8259
25.178	162.033	4.23882
36.3283	99.5122	154.235
174.97	33.6903	134.692
51.953	124.218	86.365
78.351	133.6	119.023
119.31	70.1493	88.4606
11.2079	15.0282	128.303
164.125	20.0857	69.7091
42.7947	104.396	151.101
3.01187	51.2169	29.78
8.26641	149.742	65.6601
21.1478	177.29	146.895
38.0663	37.88	113.817
72.71	35.1208	49.7622
43.3362	128.179	143.68
105.313	19.771	56.1531
1.25786	71.0653	76.1367
3.25388	153.831	154.371
149.943	107.424	23.6002
160.275	79.5358	37.5514
25.0326	36.8564	8.96935
107.168	67.6663	45.4016
83.5612	53.822	127.198
149.05	45.8095	94.7712
108.674	15.6474	13.0665
74.6533	8.30099	130.214
42.4589	102.671	147.208
65.3659	43.9812	138.212
72.5527	68.5279	5.67235
38.4063	51.1977	95.4229
125.014	49.3878	52.9979
3.25864	26.5427	139.569
82.0439	14.4066	172.897
43.358	173.525	145.928
27.3929	149.352	47.1058
172.247	27.5163	47.8698
125.028	89.2034	171.711
149.778	91.2904	138.841
40.394	42.1934	177.559
59.1569	25.6806	65.2852
84.7161	136.481	115.778
153.567	38.4467	6.89842
166.71	170.155	21.6656
111.821	16.6678	176.818
170.273	174.084	171.687
133.396	84.3791	143.96
85.6015	47.2509	1.8699
146.672	52.9453	153.412
13.5356	116.992	86.2369
115.519	92.9174	82.3639
37.302	68.5229	131.387
111.675	74.4785	163.607
3.19221	108.575	135.534
124.738	43.5199	145.35
174.706	166.045	163.851
106.148	48.4129	88.7704
29.0792	90.5211	138.472
53.5647	16.9824	0.0717314
106.396	2.30575	75.3461
168.889	172.624	56.84
26.0164	15.3766	152.004
145.465	19.4302	179.595
7.45727	61.6013	96.6908
160.598	178.393	120.157
8.6595	126.2	140.631
112.954	161.591	73.6742
169.708	14.0871	89.5332
62.0834	155.725	166.825
30.4668	15.5951	39.3903
29.1492	148.546	119.372
119.646	39.0346	143.825
108.359	94.6478	107.855
11.3916	145.461	23.9552
107.702	63.8034	47.5973
19.225	10.4969	56.4186
31.5477	79.813	69.2208
158.013	16.5535	173.905
149.025	30.3421	132.853
104.478	134.668	171.582
20.932	14.4656	134.516
82.9648	39.5415	140.357
164.634	0.0993203	94.6322
176.599	63.0242	114.031
96.4588	87.2873	112.813
100.256	77.6621	11.5016
65.2295	64.608	85.0342
163.352	13.3955	102.784
133.102	21.0011	134.057
111.224	39.0917	70.3151
33.1623	90.643	92.8946
64.5624	42.9566	113.28
16.639	82.3204	130.536
4.63135	43.461	149.512
137.54	137.121	16.4384
9.45289	14.5945	70.3393
147.142	175.476	123.174
179.17	105.028	10.6138
126.591	68.0125	46.5881
87.1133	2.72659	67.5744
34.6013	173.08	43.3321
8.18222	166.472	141.045
91.5769	56.1566	85.665
111.698	138.788	68.5565
38.0234	88.3272	114.736
66.181	157.238	114.539
8.65981	169.682	97.5688
0.711399	4.41898	84.8705
88.8336	38.7813	175.975
67.4993	114.665	95.6867
28.0662	74.2836	155.571
47.1185	70.0213	13.3946
32.6322	147.063	115.68
106.931	51.0975	165.84
169.559	67.0796	65.5996
9.2073	163.945	46.2845
57.8132	72.1186	2.73468
103.517	65.6155	12.4561
30.4189	52.4075	57.8341
63.8768	28.7673	108.182
27.2427	19.1582	47.6717
17.7765	33.3314	76.1197
67.8372	86.4406	126.682
76.4678	11.2768	136.899
44.3019	23.9287	140.251
33.0975	16.6282	64.0392
109.569	102.947	14.9749
123.018	160.827	68.5116
49.9946	37.8748	152.189
14.9842	21.436	159.249
23.191	121.655	80.0297
128.198	149.664	94.3462
154.854	117.201	54.4506
30.5197	0.0587408	177.806
19.7694	70.6176	3.07953
56.509	176.286	59.5953
36.419	67.3705	133.282
14.8525	138.978	103.909
111.092	109.504	153.051
24.7601	70.7413	40.3286
30.953	172.763	117.353
18.7193	49.0545	74.0115
132.904	67.6979	117.364
117.21	91.9269	4.54674
126.508	94.7959	69.7789
166.879	177.549	106.107
102.915	12.2115	61.723
46.2268	133.558	158.995
6.90348	135.605	92.4323
51.1093	86.0313	125.075
100.719	2.3292	132.539
27.1053	35.1491	5.18977
108.5	21.8069	165.808
3.11292	25.9049	47.8126
15.9441	177.86	55.8256
56.2781	18.1233	141.5
47.0542	52.3331	75.1605
37.5796	145.301	90.5919
38.5551	64.0982	143.65
92.4903	154.583	127.705
63.6733	88.6792	141.676
128.103	8.13722	24.4839
92.1632	23.3437	11.9169
10.5097	91.5497	159.208
40.9051	139.735	11.689
57.7397	20.5765	78.098
98.2305	157.97	163.187
3.1556	135.448	172.863
46.8219	69.8662	149.592
81.3289	143.446	84.956
35.0934	11.8924	75.4988
126.327	9.22692	58.5872
43.7216	70.1833	158.997
51.7627	111.327	57.6329
0.114057	82.1998	130.419
22.8268	70.6184	50.2952
95.2683	43.1329	16.7514
8.68107	6.87927	6.64441
153.238	69.279	9.90583
115.698	58.0154	159.471
18.2075	90.8501	89.9118
41.7826	8.51136	154.803
124.859	86.4443	169.397
65.5045	83.9748	151.664
9.42855	61.5382	107.016
168.837	38.77	149.152
81.5465	106.473	31.351
28.8259	97.5431	142.566
82.6754	46.2101	32.8309
178.659	154.147	123.442
10.0085	149.736	157.729
69.5234	100.112	140.347
19.7716	162.696	121.652
38.9412	116.818	22.7851
108.211	0.295867	80.6937
10.9573	157.154	120.811
11.5256	112.91	90.1751
103.677	35.2746	78.395
78.8844	123.13	86.1025
5.69261	33.3027	18.7814
60.84	57.3339	83.7027
67.3286	14.7897	46.5561
17.4657	136.576	134.779
62.8781	37.1256	154.249
122.322	15.7237	162.165
60.2149	102.904	123.013
93.1488	150.727	83.1943
161.39	23.1792	123.223
32.3861	37.9081	85.1993
106.412	169.126	118.553
143.498	23.1	137.949
137.417	108.863	166.255
33.793	20.6167	20.0489
101.508	103.702	19.0939
120.113	86.2146	139.024
123.05	126.831	42.4292
24.854	3.44436	31.2693
129.593	108.404	53.4939
4.56292	69.7537	80.0846
42.8628	33.0933	21.0825
117.956	1.36346	119.923
80.5416	172.744	143.281
66.8772	35.9384	106.302
147.988	1.81464	74.1309
60.6879	106.339	61.0653
64.3649	15.8493	61.8298
12.4009	65.9563	11.7992
125.792	160.893	162.075
103.433	48.207	34.505
13.9639	157.671	104.46
19.6748	156.976	30.3059
40.5038	43.9955	59.4271
38.4584	17.775	87.7035
110.457	76.3192	114.131
15.6418	19.113	46.0478
175.873	0.391796	173.402
9.64426	44.9627	27.7555
90.1005	26.7902	64.6854
69.8314	8.56709	117.364
55.8117	59.2176	13.2461
168.673	12.5849	90.4722
166.666	34.1439	141.613
27.4459	46.7292	160.178
96.5518	160.197	110.465
151.237	52.9049	1.75646
12.0651	2.42203	8.71275
63.5711	85.4799	58.0115
86.3041	64.6173	147.717
55.6633	12.1275	126.275
59.373	169.844	132.96
20.8114	39.1659	128.174
42.2841	64.0861	121.944
62.3292	58.9691	99.4287
19.497	178.025	152.999
20.8293	171.209	75.5012
33.9507	118.985	40.7702
2.01157	41.0323	38.1224
102.214	11.1851	150.984
134.747	5.53462	11.53
15.8632	32.8141	89.764
100.636	26.4906	47.4554
90.7484	146.088	48.142
41.7795	84.4394	24.8785
3.7347	48.3137	168.604
4.49124	0.172768	132.801
78.4788	137.672	122.47
57.9006	2.30452	32.7598
7.53384	53.2377	146.887
80.7547	120.246	143.271
33.0618	86.9843	98.4884
40.2126	94.83	64.4303
32.7392	1.42192	94.5422
34.9068	127.843	16.4797
3.24649	100.715	156.864
11.9907	160.418	142.743
111.222	63.2888	123.03
46.1608	13.6625	178.392
88.5463	21.1301	152.327
168.908	156.442	20.4172
121.568	50.2593	96.7206
17.7025	93.8498	83.6176
16.6723	27.5266	95.3277
10.5429	93.0611	91.8209
22.3983	79.004	64.2423
31.4479	9.7805	31.2002
64.6012	98.0011	100.553
22.2608	0.483276	166.754
117.369	69.5089	29.5594
15.85	100.683	135.546
31.3754	17.8241	59.6374
8.52874	152.024	21.2855
8.48005	6.32551	140.169
172.389	110.622	158.851
35.5583	24.5081	3.80563
50.9946	152.788	63.0687
61.1767	163.495	84.2309
103.974	20.4034	165.558
71.1173	126.124	149.172
90.0018	90.5492	167.831
4.71444	5.26505	6.34286
40.6983	33.5961	2.04438
9.2076	176.039	140.819
97.4277	117.837	167.205
123.853	8.29974	62.7079
86.2765	54.6633	79.1026
56.8411	11.3095	21.6743
167.522	145.012	32.2412
92.7978	50.2788	149.083
53.8254	99.4922	153.402
57.4772	38.2389	24.2036
25.1124	137.555	4.59445
48.8062	135.299	8.18649
141.783	39.3135	3.04772
75.6444	60.0559	161.774
109.274	22.7184	82.7625
19.7721	147.673	44.1173
19.8943	12.2647	92.6068
26.1177	3.11122	60.1671
156.128	119.104	41.376
10.5282	121.958	165.463
35.0796	145.638	105.413
14.8772	138.775	55.3525
144.326	16.061	149.166
132.31	39.4305	100.045
71.5472	111.599	152.221
11.3035	52.6082	25.061
164.987	34.1895	33.0937
32.0388	15.5935	89.5999
176.778	59.3073	110.905
20.7703	55.5107	108.774
8.76174	41.3501	6.19491
127.447	124.947	24.2292
94.7271	119.81	132.528
59.0504	8.32437	76.4166
151.485	109.095	55.5492
69.9292	169.093	45.9194
60.4327	5.14888	25.0467
17.423	4.32413	73.1305
8.1541	168.233	55.1966
155.629	108.835	57.844
105.222	60.2574	138.611
129.653	111.847	38.4001
87.1248	93.4658	78.7413
23.0482	120.864	92.0655
173.545	112.43	137.681
121.716	90.7201	116.533
27.1467	75.8118	178.242
174.46	16.7552	44.4241
6.00047	103.37	106.399
0.0274367	12.9082	143.246
64.6313	41.6618	94.0006
51.0508	6.13315	146.195
160.263	84.18	14.2889
176.902	29.1769	49.3526
4.47356	31.1745	46.761
19.4352	151.133	126.524
164.379	166.918	9.28908
69.828	88.7603	158.391
51.1618	134.133	146.542
81.2277	131.951	155.07
28.7138	16.3726	37.9811
116.338	174.158	46.1654
50.3351	162.112	176.714
161.24	125.199	111.475
157.528	175.301	150.964
9.71417	121.945	60.0032
142.368	14.5709	103.662
4.05576	19.6455	116.767
45.5559	30.653	95.2457
32.7444	60.7884	142.641
43.6255	4.34658	178.817
35.0945	91.1679	161.354
50.9178	20.0238	103.742
90.2687	13.2181	133.293
39.3777	120.639	99.2108
76.4204	57.2056	89.7951
37.2475	68.6895	88.0945
106.576	74.6319	10.5219
78.7137	116.601	112.501
4.74726	66.8593	123.487
5.65527	23.254	131.966
14.0015	118.456	84.9395
6.63259	156.933	109.81
169.927	68.9553	162.129
61.5419	32.2775	88.8782
9.30988	160.639	51.6937
85.4931	12.9462	167.465
15.5345	160.052	163.21
44.0529	167.819	35.2005
130.58	133.555	144.932
70.3445	138.493	14.4948
122.032	94.758	130.243
105.363	164.611	33.5764
42.8064	74.2029	173.584
140.392	149.516	56.7185
113.993	142.051	4.02663
166.314	149.627	75.0235
63.8906	16.513	9.15586
11.7616	0.84355	53.8772
0.653005	125.082	77.1068
63.4238	68.4498	62.6818
23.7939	80.1821	60.941
56.8694	11.8931	76.8627
69.6273	132.912	50.8737
109.369	92.4591	88.2241
128.717	15.7821	41.6181
18.6803	31.3053	171.973
52.1304	45.0444	45.4133
150.565	76.4322	12.358
107.935	4.86489	118.867
118.691	116.162	90.5621
66.6578	42.9144	47.8532
129.812	29.0901	2.97139
46.4077	129.267	133.005
51.8727	46.7275	31.7762
128.778	58.4973	95.6394
131.801	115.954	61.0192
32.3583	177.873	67.69
115.021	84.6209	52.2409
143.85	42.7239	174.509
74.5483	90.54	39.3159
28.534	20.0059	136.63
93.5634	126.137	69.3966
51.4668	7.19844	140.27
17.3266	137.21	38.4087
25.4058	147.67	73.3271
142.744	60.6602	56.1754
3.76552	66.4054	98.9435
171.711	29.8166	120.049
34.9156	59.5486	140.327
37.5087	148.576	0.582282
50.4872	93.1801	32.6036
1.86169	46.6293	30.4554
76.1044	89.8167	86.0427
12.5701	97.4177	61.4819
10.4871	134.805	46.5075
31.404	57.7714	154.639
43.6001	1.45343	123.538
177.452	122.891	116.782
15.7424	65.8552	38.6583
151.302	136.405	171.16
149.892	115.029	41.0432
149.856	127.09	24.5208
168.013	135.998	83.1279
51.7504	107.997	13.0012
69.6905	16.1861	132.809
20.2498	108.304	144.336
37.187	31.5886	113.571
24.0611	38.0901	7.7229
112.039	58.1873	93.0316
141.975	86.1585	36.9199
66.3168	28.429	15.4659
101.392	41.9156	58.5632
23.5148	73.0747	158.651
46.9295	41.8583	0.958917
46.4192	1.43593	83.2395
122.122	107.339	116.173
38.6352	166.363	61.6542
121.967	111.265	118.753
12.245	88.6109	123.509
129.67	41.8383	137.764
44.3496	101.209	148.855
0.155922	33.4504	55.7216
160.989	84.8514	101.435
22.849	134.842	6.26652
170.404	94.3699	8.32242
14.2349	24.096	177.34
17.3744	26.9778	141.291
146.218	68.4462	35.3654
50.3152	16.698	82.0432
68.1356	85.1496	149.022
36.0037	118.657	142.997
16.6141	3.49531	121.365
70.5764	43.2043	127.58
8.98205	100.828	127.938
148.327	28.465	170.901
62.2997	37.9964	44.2834
128.348	137.632	130.345
13.544	32.5841	111.752
149.311	6.35686	4.96233
60.544	102.645	55.969
16.0472	119.073	103.864
10.3706	169.594	26.9481
101.72	156.609	122.776
80.8175	147.676	21.3813
0.818713	31.669	106.246
177.302	125.274	141.308
59.0033	17.5376	101.17
20.5285	72.7062	131.575
127.849	130.096	124.287
39.3914	69.0717	41.2152
42.5131	153.277	42.9606
109.669	163.952	10.461
36.1962	136.612	94.8137
82.7875	170.365	124.911
35.4112	109.306	20.8278
19.8138	151.47	172.679
53.6841	36.8176	107.6
19.6886	89.0021	32.1626
88.9472	68.4075	65.0875
80.096	19.196	29.4244
57.6435	8.58723	177.726
136.758	97.5821	146.631
101.449	66.9017	77.1514
70.7067	36.2304	47.9685
52.1442	53.1707	43.1718
114.315	102.977	130.706
139.285	170.007	114.511
46.0599	127.214	154.146
75.8806	4.36426	135.953
6.91537	53.0808	10.609
86.2341	48.0066	51.7987
170.614	158.296	146.731
1.0796	25.9098	57.9275
123.835	59.8569	83.6283
15.4045	50.088	22.5859
125.774	40.8497	129.233
19.1639	81.7339	66.6351
21.2416	37.4905	85.6359
105.536	58.3255	21.626
156.232	112.445	85.8202
78.2049	35.016	2.1657
135.165	100.864	51.7693
66.114	29.1332	152.956
64.5693	57.483	56.8371
175.332	179.39	10.2219
28.2733	53.7114	121.457
165.006	13.3332	1.2981
20.7949	42.6418	59.8548
162.802	46.912	171.081
61.4837	55.6771	43.2683
30.9704	161.459	42.5891
118.849	57.8222	15.0086
5.63097	27.099	66.53
59.0917	76.9446	11.0454
172.859	30.9588	140.652
67.6253	71.6399	166.352
51.077	177.175	67.8662
158.512	73.2613	175.173
84.5699	90.0272	167.431
52.4914	110.411	176.687
4.14205	66.9222	68.7884
133.334	15.1291	142.574
148.391	35.5648	99.9406
122.723	92.8478	174.861
12.9827	178.03	132.291
96.6069	101.364	34.4877
43.4168	20.2697	5.8419
91.9428	30.7772	165.768
134.117	149.162	110.82
133.15	9.20651	117.805
80.0745	8.2842	30.8295
29.355	61.897	46.2171
121.061	73.5688	47.6588
27.7497	158.693	33.9648
48.6848	119.989	45.1253
175.384	84.1391	149.899
9.64692	139.964	74.7979
0.0931612	51.1332	41.2872
43.3368	60.1832	17.4964
23.519	36.5457	145.437
17.6245	172.086	58.0664
26.1384	34.2589	54.9691
67.3868	107.108	31.6184
4.16301	32.5196	13.9524
27.648	54.8341	20.7251
150.729	123.417	152.659
6.08044	66.7933	49.5208
74.3597	111.367	179.051
1.05005	137.618	65.2414
175.352	4.14899	16.8257
47.9817	67.7592	86.9985
41.8458	58.6758	2.97598
67.5536	8.9411	16.8851
3.45963	105.889	3.44736
124.424	91.8678	106.544
11.0722	105.6	27.8536
18.288	82.3985	5.09023
52.4027	36.298	42.9718
166.309	100.163	163.999
84.1063	128.87	6.69485
83.3448	39.7392	76.6247
80.0542	162.116	59.5842
49.2699	166.564	38.441
3.56807	136.642	136.103
12.0598	100.774	39.0431
133.084	146.639	148.861
147.564	41.3009	49.794
46.9077	59.546	25.9583
51.1672	89.6396	22.7889
27.8791	141.23	77.967
53.0244	80.994	97.6432
84.4684	177.38	31.2769
82.756	97.9551	43.113
0.246316	9.59646	94.811
85.2029	76.3601	161.875
135.116	90.0713	0.820176
45.2757	138.174	30.3187
100.222	2.64078	26.158
13.3163	31.0703	171.128
42.3827	158.632	10.5319
53.913	143.383	162.541
20.6779	113.553	86.8473
7.50192	169.124	166.47
155.345	144.776	140.841
5.68327	25.2402	72.6019
1.72856	4.14199	4.05108
19.6804	177.471	114.782
15.6158	16.421	78.9911
155.073	35.3599	74.6393
51.6253	77.5962	162.175
73.0346	146.02	87.8401
44.5866	117.452	142.644
157.693	111.499	161.248
7.44844	157.548	144.006
170.979	34.0718	107.806
30.3986	149.429	38.7421
47.4298	118.755	21.306
58.6285	25.6228	12.3161
63.7203	146.348	148.706
9.89493	30.9015	175.756
56.1657	144.37	66.3938
90.934	1.89676	171.49
128.268	24.4771	80.9174
75.2525	0.102795	127.646
165.821	24.3353	17.2321
6.15393	18.8407	59.3338
17.7889	32.6945	56.3898
71.014	170.985	5.3057
117.396	2.73225	98.1054
22.9103	7.91365	79.4473
10.8575	95.5946	82.7027
16.4285	13.4729	14.4855
46.7698	164.614	161.542
118.031	15.3483	37.7215
41.4701	95.2779	38.3326
48.9626	21.3593	15.3035
152.201	144.817	163.366
40.1745	89.6167	13.8772
29.0423	65.7141	82.3195
32.6439	150.868	171.998
7.24569	34.6502	101.273
102.89	170.33	91.4694
28.2101	129.213	17.9241
146.162	43.1708	88.9655
129.479	36.2974	18.8945
12.2482	29.5562	102.564
133.118	10.7553	141.306
158.675	98.7399	64.0488
64.5416	168.321	36.8075
80.1528	14.4817	171.655
144.035	13.4877	176.146
161.1	4.06688	148.385
53.8925	32.2629	45.7759
81.183	26.2932	140.613
35.8696	17.1285	162.542
41.2068	45.0074	123.356
152.971	8.74246	86.8066
77.2885	92.4374	105.34
111.786	73.8705	102.387
84.238	54.3625	104.04
93.2548	175.305	17.7031
138.444	4.2156	20.6744
30.4043	35.0227	141.173
79.2514	34.1689	139.582
4.00195	47.1547	96.7947
77.6673	94.6593	147.68
168.233	20.9646	102.351
82.225	14.953	118.303
2.85363	121.84	43.8493
4.65891	109.273	21.5532
144.188	147.65	22.9407
46.6012	6.44226	58.7555
108.502	58.0547	172.832
123.621	64.859	124.488
165.302	119.729	156.501
11.9208	44.6582	17.3868
116.426	43.9931	76.04
164.37	160.402	54.8379
53.5009	47.3893	51.1654
18.362	14.5366	93.0205
99.2544	31.3792	73.5843
128.652	36.9977	46.6644
22.7549	31.4585	169.505
43.8368	88.6013	37.0851
158.364	30.7646	110.233
37.1533	24.7102	89.2694
47.5536	179.925	114.442
52.907	79.4157	47.0886
0.672992	124.745	88.2552
170.971	56.8767	134.198
99.8437	57.779	115.069
53.0576	97.5771	104.401
66.3375	52.3888	146.206
9.79866	179.554	130.179
89.592	65.8963	50.7798
66.7551	56.7069	64.1889
87.0981	18.8003	53.0297
34.6106	32.9344	12.2013
52.5527	65.447	46.7225
129.372	106.475	154.238
8.75184	0.844253	55.0025
126.326	133.492	83.3149
6.46949	88.313	55.6907
146.977	21.7089	164.01
40.2312	62.3006	177.886
45.4991	124.041	170.231
24.6503	8.30017	78.8164
32.3436	57.6528	15.7633
85.828	49.343	29.4767
176.214	137.399	128.093
10.5331	32.8263	136.495
141.39	80.1094	76.7734
36.1901	73.4006	99.6447
128.642	115.404	142.807
111.242	80.2987	111.396
91.2434	75.975	132.139
82.5075	23.7871	43.6268
108.016	6.1701	45.7483
161.183	130.453	6.57231
30.0609	40.9495	112.725
103.48	55.3689	68.2394
149.835	69.7119	60.9028
94.5347	43.8034	31.432
95.1742	39.9717	98.0039
139.68	75.4663	7.63652
140.511	67.6603	89.3315
52.0421	26.1286	71.3473
26.255	168.174	111.172
21.6333	32.081	123.653
63.0959	140.996	153.986
108.678	150.111	166.63
25.6554	38.3862	116.105
117.079	131.204	14.0937
38.0847	94.2351	102.503
145.551	78.6199	152.067
154.786	34.4267	158.036
6.9489	158.491	55.5982
60.7324	15.2258	169.149
63.0292	173.074	142.569
60.2096	32.4367	72.6514
70.8153	117.323	1.37123
143.54	106.128	159.802
126.176	146.074	107.224
74.2079	142.749	119.172
120.837	84.868	148.938
32.5913	87.8925	90.3275
7.42209	58.0769	90.583
92.0597	75.4747	137.365
1.21297	41.6693	55.3969
49.9888	53.0926	119.213
144.351	169.438	121.486
36.5265	39.4335	124.022
85.0195	82.8086	90.4256
33.4384	121.008	56.0599
20.3484	96.6218	174.523
48.4407	164.595	38.6634
10.4464	137.238	27.237
113.916	32.9952	14.0319
43.0412	96.531	164.645
50.3446	78.0964	168.751
128.17	22.8884	83.3351
89.0678	2.03244	115.17
176.135	172.339	55.6699
58.4398	135.576	103.47
122.822	179.328	142.193
3.26612	85.5084	0.835855
39.7555	41.7381	47.4007
17.2596	110.94	168.871
7.28534	59.2578	114.549
17.6278	67.3835	52.6067
85.2618	151.447	153.978
14.8528	9.76797	95.9843
61.7768	8.97454	169.459
156.158	127.609	88.5711
0.675219	112.204	149.358
29.5118	58.9265	78.8893
177.984	86.9102	131.73
47.2905	30.4228	25.0306
53.8603	17.5348	98.4135
76.0098	54.0208	46.2998
77.2934	106.661	82.6426
85.3423	91.5979	32.6614
40.1065	105.455	121.121
101.118	40.8639	76.6175
179.542	82.5039	139.955
11.1393	71.0009	30.512
123.298	153.087	41.6315
1.34321	121.695	88.4686
128.136	72.948	127.547
69.2793	2.10012	41.4663
41.2834	37.6229	19.5314
58.8766	61.7894	111.824
23.7146	24.2013	19.714
49.5298	21.6361	55.0022
135.637	27.858	95.0392
174.417	16.701	151.897
79.6626	110.598	22.7013
108.109	20.1287	168
167.22	90.2036	103.345
62.9447	145.461	9.38451
92.2321	8.2448	179.134
26.8515	104.063	22.0347
5.6512	19.7655	115.555
152.918	1.11457	158.754
12.2902	27.3401	36.9231
166.758	87.4973	131.92
18.1166	153.116	14.8516
65.6112	36.1189	127.92
29.4666	172.323	145.826
25.0323	30.2816	37.7348
43.1554	132.704	161.852
2.19073	103.431	91.3794
71.756	122.234	49.3747
52.9172	46.7227	92.358
122.978	73.2443	104.24
55.4671	60.8048	96.5564
159.494	7.67104	169.113
157.383	24.9596	155.44
5.67744	18.1254	91.8793
70.3826	9.36394	28.0765
51.3737	84.6315	42.3694
133.665	60.4238	56.7831
1.14819	6.21196	117.446
78.6632	52.2552	78.4763
103.081	107.688	129.003
140.495	39.8814	30.3006
22.7429	164.161	129.038
25.8326	65.2972	138.663
164.777	49.9079	126.607
26.855	122.988	103.373
10.2411	23.644	20.7579
59.7918	127.929	66.6007
31.5495	139.742	43.9429
146.736	166.35	44.1509
2.84015	89.7557	170.468
26.1385	61.5739	70.3952
109.278	2.88026	154.38
9.97311	70.0976	31.8096
39.5217	11.2267	73.3042
9.89406	27.8283	51.0749
107.09	18.0187	15.4269
95.0625	121.766	68.5163
13.491	179.339	56.637
39.609	127.544	165.604
33.8012	159.943	41.7283
83.0333	35.0648	56.5775
153.641	77.4551	2.48303
11.0409	179.329	20.2021
62.8212	98.2475	77.0168
47.8703	166.464	26.9006
120.137	173.838	58.9038
77.6287	26.0729	72.0373
83.9128	111.315	85.4449
34.2916	40.2059	175.462
172.522	30.9464	75.1066
129.672	105.409	167.946
127.978	135.643	24.8965
132.75	74.9793	155.125
63.8182	17.7232	117.745
143.073	34.3964	57.0687
64.6328	25.058	137.271
15.8835	25.0579	5.64705
114.808	93.2628	93.693
117.696	67.5521	154.036
21.1147	126.526	99.7097
131.219	90.891	177.315
126.478	136.005	17.7256
70.027	107.064	69.8867
48.2654	125.895	142.451
79.9538	132.171	100.08
83.9417	126.309	116.178
157.667	74.1796	166.829
115.939	115.173	40.9451
174.889	153.282	165.99
57.2847	84.143	15.317
73.3416	94.3649	61.4865
53.6674	81.9148	88.4746
14.351	150.328	116.705
49.1325	175.249	18.6439
12.5751	4.45091	165.514
86.3518	109.068	70.2252
49.996	32.9416	42.5775
2.89469	2.02064	123.544
37.6288	44.6432	177.872
87.6681	87.0592	99.224
56.7635	67.7506	73.8539
121.942	7.44739	111.836
131.737	19.419	68.8156
132.798	8.09001	20.0047
59.1588	13.3748	79.3628
53.6953	14.1068	140.675
73.2783	166.163	158.007
157.079	157.354	51.2775
20.3311	66.0377	177.753
104.406	6.84202	136.549
85.5901	34.115	101.259
28.9172	111.225	153.292
25.5612	49.1877	139.653
104.471	173.106	142.098
54.6213	28.864	69.6838
154.98	95.6553	118.858
131.569	107.479	61.4382
81.4238	122.053	57.5024
44.1531	149.697	70.2817
94.9725	51.975	107.592
146.006	27.5844	63.3196
152.89	59.9135	132.239
73.4982	61.0278	81.9399
83.667	109.903	13.7174
67.9323	30.5826	91.1071
51.4042	120.758	121.399
73.4482	37.8945	159.699
48.8098	15.3621	96.9803
104.034	108.845	142.428
178.071	132.19	28.9203
11.367	24.7144	163.145
94.5736	76.9385	136.128
41.7175	56.4551	62.7751
6.55379	99.3536	31.0221
16.0828	89.5349	50.8855
37.3313	41.9113	124.306
9.68058	27.7964	4.98867
38.3466	50.2417	106.085
162.202	128.057	141.196
52.2111	2.72713	156.018
11.6722	29.7431	41.3416
140.014	93.5028	33.9719
43.4384	16.4561	15.6178
55.3579	66.1035	167.556
57.7038	153.217	90.7142
78.8244	71.0016	68.6787
28.0364	102.229	60.6012
10.1763	164.727	43.9634
138.409	121.61	170.451
14.4877	175.259	125.265
160.771	7.54462	59.2175
3.81191	116.835	108.152
22.0611	17.0629	41.1147
135.167	24.4746	56.0328
149.457	127.067	129.773
105.072	175.062	42.5439
48.437	120.048	104.984
86.0089	67.7981	70.107
64.8637	16.3506	40.7908
111.517	13.9589	21.3253
0.143307	9.8484	60.8306
21.232	96.0508	90.5009
35.1368	40.9812	113.299
44.9804	139.269	123.189
81.048	114.966	135.926
143.35	58.9916	150.416
42.3453	133.981	15.0406
14.2425	59.8964	30.7031
1.5898	61.1046	155.378
130.949	68.1178	78.8417
50.86	178.18	173.919
114.651	70.3284	165.246
53.3403	143.445	39.585
155.382	5.25953	158.643
16.1456	125.632	44.0911
47.6561	157.858	96.3108
7.70411	50.2448	90.7845
122.202	118.789	145.883
94.584	14.1373	103.826
170.2	51.0788	116.446
3.53769	50.7154	104.822
136.518	19.9106	75.6076
52.3775	178.576	125.758
33.5239	63.0879	158.317
36.7174	129.45	51.6656
[truncated: 309,867+ more rows]
