# Supplementary material for: High-throughput, single-particle tracking reveals nested membrane domains that dictate KRasG12D diffusion and trafficking
Source: eLife journal article supplement (doi:10.7554/elife.46393), 2019-11-01
Supplement: supp [file elife-46393-supp-v1.zip › elife_poa_e46393_Figure_4_source_data_1.xlsx]

## Sheet: figure 4A
Diffusion	1stquarter				2ndquarter				3rdquarter				4thquarter
Immobile	0.0806	0.0779	0.1079	0.0887	0.0998	0.0894	0.0944	0.0873	0.0899	0.0911	0.0908	0.0964	0.1089	0.0934	0.1067	0.0891
Intermediate	0.2229	0.2786	0.3017	0.2772	0.2834	0.2759	0.2786	0.2932	0.2879	0.2816	0.2665	0.2871	0.3273	0.2865	0.2803	0.2629
Fast	0.8741	0.9105	0.9172	0.8623	0.9071	0.8902	0.9197	0.8556	0.9024	0.8779	0.8709	0.8471	0.9068	0.882	0.8492	0.8496
Occupancy	1stquarter				2ndquarter				3rdquarter				4thquarter
Immobile	0.1289	0.0673	0.0898	0.0898	0.1344	0.0798	0.0791	0.0998	0.1256	0.091	0.1037	0.1048	0.1797	0.0883	0.1242	0.0914
Intermediate	0.2734	0.2943	0.2803	0.2592	0.2917	0.2795	0.2876	0.2662	0.3373	0.2777	0.3269	0.2755	0.3021	0.2868	0.316	0.2483
Fast	0.5977	0.6383	0.6298	0.651	0.5739	0.6406	0.6333	0.634	0.5371	0.6312	0.5694	0.6197	0.5182	0.6249	0.5599	0.6603

## Sheet: figure 4B
simulation time (s)	simulated occupancy: immobile state									simulated occupancy: intermediate state									simulated occupancy: fast state
1	0.104362	0.0963377	0.0963359	0.149845	0.130926	0.124424	0.102952	0.0798237		0.2776	0.273086	0.289385	0.307498	0.341291	0.383811	0.305549	0.288779		0.618039	0.630576	0.614279	0.542657	0.527784	0.491765	0.591499	0.631397
2	0.115468	0.107074	0.106788	0.164003	0.142119	0.139217	0.111748	0.0875412		0.284568	0.281005	0.297863	0.31658	0.348155	0.391597	0.313899	0.29612		0.599964	0.611921	0.595349	0.519416	0.509725	0.469186	0.574352	0.616339
3	0.127488	0.117522	0.117299	0.177502	0.153994	0.155178	0.120371	0.0960579		0.2867	0.288015	0.302421	0.323682	0.357216	0.396598	0.320849	0.301851		0.585813	0.594463	0.58028	0.498816	0.488791	0.448224	0.558779	0.602091
4	0.138773	0.127415	0.128216	0.191318	0.164538	0.17045	0.129551	0.104483		0.290461	0.294803	0.307357	0.32803	0.359751	0.40118	0.325198	0.304933		0.570766	0.577782	0.564427	0.480652	0.47571	0.42837	0.545251	0.590584
5	0.150327	0.136465	0.137477	0.205955	0.175454	0.186171	0.138608	0.113034		0.293453	0.30108	0.311161	0.329122	0.36439	0.403007	0.328506	0.308963		0.55622	0.562454	0.551362	0.464923	0.460156	0.410822	0.532887	0.578003
6	0.160287	0.146913	0.147465	0.219589	0.187081	0.200695	0.147094	0.121345		0.297465	0.301768	0.313338	0.331694	0.365286	0.405163	0.331368	0.310002		0.542248	0.551319	0.539196	0.448716	0.447633	0.394143	0.521538	0.568653
7	0.170891	0.158714	0.15603	0.234135	0.199264	0.215877	0.155804	0.129188		0.298289	0.302744	0.315603	0.328713	0.364823	0.407139	0.332569	0.312319		0.53082	0.538542	0.528367	0.437153	0.435913	0.376984	0.511627	0.558492
8	0.18146	0.16934	0.16628	0.248862	0.210087	0.231209	0.165294	0.136826		0.298612	0.30636	0.317461	0.326709	0.364019	0.407379	0.335803	0.31305		0.519928	0.524301	0.516259	0.424429	0.425894	0.361412	0.498904	0.550124
9	0.191491	0.179987	0.176151	0.262064	0.220879	0.244984	0.17352	0.144589		0.299239	0.30636	0.315429	0.327347	0.361916	0.407798	0.335989	0.313598		0.50927	0.513653	0.50842	0.410589	0.417205	0.347218	0.490491	0.541813
10	0.201218	0.19008	0.185442	0.275266	0.232042	0.259388	0.181635	0.151473		0.298486	0.305384	0.315168	0.325139	0.357834	0.407169	0.337587	0.315436		0.500296	0.504536	0.49939	0.399595	0.410124	0.333443	0.480779	0.533091
11	0.210927	0.200262	0.194414	0.288924	0.242123	0.271336	0.188907	0.159157		0.296229	0.306692	0.316532	0.321042	0.35802	0.405133	0.338863	0.315151		0.492844	0.493046	0.489054	0.390035	0.399858	0.323531	0.47223	0.525693
12	0.220528	0.209334	0.203937	0.301557	0.251678	0.284153	0.197071	0.166897		0.295602	0.307269	0.317026	0.319016	0.357834	0.403635	0.337847	0.312845		0.483869	0.483397	0.479037	0.379427	0.390488	0.312212	0.465082	0.520258
13	0.228625	0.21956	0.211921	0.314691	0.260119	0.29652	0.204814	0.173347		0.295728	0.30738	0.318013	0.315556	0.355793	0.400461	0.337067	0.312833		0.475647	0.47306	0.470066	0.369753	0.384087	0.303019	0.458119	0.51382
14	0.237564	0.229653	0.22037	0.326254	0.269458	0.306642	0.21174	0.17974		0.292987	0.303676	0.319116	0.312278	0.352948	0.40097	0.337116	0.312422		0.469449	0.466671	0.460513	0.361468	0.377594	0.292388	0.451144	0.507837
15	0.244854	0.238504	0.228819	0.338022	0.278085	0.316883	0.218851	0.186864		0.292718	0.302345	0.316068	0.30875	0.350908	0.398575	0.335072	0.313096		0.462427	0.459151	0.455113	0.353228	0.371007	0.284542	0.446077	0.50004
16	0.253704	0.248486	0.237907	0.350223	0.288135	0.328322	0.225727	0.193817		0.289064	0.300748	0.31508	0.304493	0.345867	0.396149	0.333722	0.311212		0.457232	0.450766	0.447012	0.345284	0.365998	0.275529	0.440552	0.494971
17	0.26146	0.257093	0.245717	0.361946	0.297072	0.339702	0.232095	0.20029		0.286001	0.298951	0.314326	0.300646	0.340827	0.391448	0.332681	0.310504		0.452539	0.443956	0.439957	0.337408	0.362101	0.268851	0.435224	0.489206
18	0.268249	0.26499	0.253237	0.373828	0.304029	0.347547	0.238735	0.206192		0.285266	0.297975	0.312903	0.297665	0.338477	0.3901	0.330612	0.310618		0.446485	0.437036	0.43386	0.328508	0.357494	0.262353	0.430653	0.483189
19	0.275146	0.272376	0.260438	0.385095	0.310214	0.356022	0.244422	0.212414		0.285535	0.296511	0.311829	0.293408	0.338075	0.387794	0.330017	0.309237		0.439319	0.431113	0.427734	0.321497	0.351712	0.256184	0.425561	0.478349
20	0.280949	0.279941	0.268161	0.395862	0.316924	0.364257	0.250059	0.218339		0.284496	0.296089	0.309767	0.289129	0.336436	0.385728	0.329559	0.308015		0.434554	0.42397	0.422072	0.31501	0.34664	0.250015	0.420382	0.473645
21	0.287738	0.286972	0.275361	0.406219	0.323232	0.37339	0.256179	0.224196		0.28163	0.295557	0.305702	0.285714	0.335663	0.381745	0.327886	0.307228		0.430631	0.417471	0.418936	0.308067	0.341105	0.244864	0.415935	0.468576
22	0.29365	0.294048	0.281894	0.415847	0.330066	0.381955	0.262064	0.229664		0.280717	0.294758	0.304251	0.282505	0.332663	0.37908	0.326164	0.306223		0.425634	0.411193	0.413855	0.301648	0.337271	0.238965	0.411772	0.464112
23	0.300063	0.301324	0.288746	0.424838	0.33758	0.3901	0.267441	0.23487		0.279893	0.29254	0.30126	0.277315	0.328613	0.376175	0.325644	0.303666		0.420045	0.406136	0.409994	0.297847	0.333807	0.233725	0.406916	0.461464
24	0.304845	0.309199	0.294292	0.433739	0.344538	0.397886	0.272396	0.240225		0.279803	0.290211	0.300476	0.273992	0.325335	0.373211	0.324975	0.303711		0.415352	0.40059	0.405232	0.29227	0.330128	0.228903	0.402629	0.456064
25	0.310327	0.315787	0.299634	0.442593	0.350753	0.406121	0.27729	0.245419		0.279624	0.288259	0.299954	0.270099	0.322242	0.368869	0.324269	0.302627		0.410049	0.395954	0.400412	0.287308	0.327005	0.22501	0.398441	0.451954
26	0.316274	0.322686	0.305238	0.450924	0.35669	0.413098	0.282518	0.250351		0.278119	0.287105	0.301521	0.26755	0.321686	0.365365	0.321568	0.301622		0.405607	0.390209	0.393241	0.281526	0.321624	0.221537	0.395914	0.448027
27	0.320681	0.329429	0.311829	0.460006	0.363493	0.420165	0.287461	0.255603		0.277635	0.284621	0.299344	0.263384	0.318346	0.363958	0.319833	0.300047		0.401684	0.38595	0.388828	0.276609	0.318161	0.215877	0.392705	0.444351
28	0.326055	0.335906	0.316764	0.468246	0.369739	0.427053	0.292107	0.260432		0.275593	0.281338	0.298966	0.260744	0.31612	0.360634	0.31909	0.298597		0.398352	0.382755	0.384269	0.27101	0.314141	0.212314	0.388803	0.440971
29	0.330981	0.341785	0.321526	0.4766	0.374532	0.43412	0.296641	0.264313		0.274089	0.28034	0.29676	0.256874	0.312007	0.357998	0.318	0.296747		0.394931	0.377875	0.381714	0.266526	0.313461	0.207882	0.385359	0.438939
30	0.334492	0.346288	0.326404	0.484385	0.379387	0.4396	0.300754	0.268617		0.272602	0.279608	0.296527	0.254143	0.312749	0.355363	0.3166	0.294784		0.392906	0.374104	0.377069	0.261472	0.307864	0.205037	0.382646	0.436599
31	0.33897	0.351634	0.330759	0.491874	0.383747	0.445349	0.305574	0.272225		0.271975	0.277567	0.296702	0.24975	0.311574	0.354046	0.313713	0.294989		0.389055	0.370799	0.372539	0.258377	0.304679	0.200605	0.380713	0.432786
32	0.342714	0.357157	0.335143	0.499181	0.388973	0.450141	0.309476	0.276072		0.27185	0.276458	0.293827	0.247382	0.308018	0.350871	0.313565	0.294829		0.385437	0.366385	0.37103	0.253437	0.303009	0.198988	0.376959	0.429098
33	0.346296	0.361394	0.339789	0.507011	0.394075	0.455052	0.312809	0.280548		0.271169	0.275504	0.291824	0.2439	0.306719	0.349105	0.31219	0.292158		0.382535	0.363102	0.368387	0.24909	0.299205	0.195844	0.375002	0.427294
34	0.350345	0.365653	0.344434	0.513271	0.400445	0.46176	0.316216	0.284052		0.271223	0.273463	0.291156	0.242079	0.303473	0.34611	0.310542	0.291884		0.378433	0.360884	0.36441	0.244651	0.296082	0.19213	0.373242	0.424064
35	0.354662	0.3706	0.349544	0.519826	0.405764	0.465892	0.319573	0.28806		0.268016	0.271667	0.288601	0.238892	0.302112	0.344852	0.310777	0.289178		0.377322	0.357734	0.361855	0.241282	0.292124	0.189256	0.36965	0.422762
36	0.359069	0.374969	0.353173	0.526837	0.41	0.471522	0.323439	0.291153		0.266225	0.269692	0.287498	0.23616	0.29803	0.342187	0.308745	0.28887		0.374707	0.355338	0.359329	0.237003	0.291969	0.186291	0.367816	0.419976
37	0.361988	0.378718	0.356977	0.533688	0.414268	0.475445	0.326437	0.294784		0.264487	0.269093	0.28593	0.233361	0.293948	0.339941	0.307147	0.287751		0.373524	0.352188	0.357093	0.232951	0.291784	0.184614	0.366416	0.417465
38	0.364299	0.382201	0.36078	0.539356	0.418226	0.479996	0.329286	0.298232		0.264989	0.268583	0.283056	0.231107	0.292279	0.338414	0.305809	0.286495		0.370712	0.349216	0.356164	0.229537	0.289496	0.18159	0.364905	0.415273
39	0.3679	0.387724	0.362493	0.545297	0.420885	0.48362	0.331702	0.302182		0.264487	0.264435	0.281459	0.228922	0.292681	0.336108	0.304781	0.285696		0.367613	0.347841	0.356048	0.225781	0.286434	0.180272	0.363517	0.412122
40	0.371178	0.392116	0.366674	0.550624	0.42475	0.486824	0.334366	0.306783		0.263824	0.262372	0.279804	0.225917	0.289774	0.333982	0.303121	0.283219		0.364998	0.345511	0.353522	0.223459	0.285476	0.179194	0.362513	0.409999
41	0.373936	0.39571	0.369694	0.555495	0.428121	0.490627	0.337104	0.309888		0.26515	0.262195	0.27841	0.224893	0.288661	0.331018	0.30234	0.282637		0.360914	0.342095	0.351896	0.219612	0.283218	0.178355	0.360556	0.407475
42	0.376874	0.399303	0.371755	0.562483	0.432234	0.494041	0.339829	0.313119		0.26352	0.261307	0.280239	0.221706	0.28628	0.330359	0.300618	0.28081		0.359606	0.339389	0.348005	0.215811	0.281487	0.1756	0.359553	0.406071
43	0.37888	0.401588	0.375617	0.568151	0.434429	0.496736	0.341997	0.316589		0.263287	0.262239	0.279223	0.218474	0.287362	0.328203	0.299776	0.27928		0.357833	0.336173	0.34516	0.213375	0.278209	0.175061	0.358227	0.40413
44	0.380564	0.406424	0.378462	0.573728	0.437398	0.498772	0.344549	0.318781		0.262481	0.259688	0.280239	0.215925	0.285878	0.328293	0.298723	0.27823		0.356955	0.333888	0.341298	0.210348	0.276725	0.172935	0.356728	0.402989
45	0.383412	0.410461	0.381395	0.577916	0.440304	0.499611	0.346358	0.320882		0.261639	0.259888	0.278933	0.214536	0.284301	0.328622	0.298921	0.277294		0.354948	0.329651	0.339672	0.207548	0.275395	0.171767	0.354721	0.401824
46	0.386673	0.413256	0.384124	0.583811	0.442685	0.504312	0.348886	0.324284		0.259866	0.2592	0.278439	0.211577	0.284301	0.326975	0.2985	0.27718		0.353462	0.327544	0.337437	0.204612	0.273014	0.168713	0.352615	0.398536
47	0.387228	0.415363	0.386215	0.589684	0.445376	0.507846	0.350905	0.326544		0.260618	0.259289	0.278033	0.208891	0.283682	0.325268	0.298809	0.278276		0.352154	0.325348	0.335753	0.201425	0.270942	0.166886	0.350286	0.39518
48	0.389127	0.418979	0.389031	0.594396	0.447788	0.510092	0.353717	0.32933		0.259955	0.257581	0.27661	0.205841	0.283095	0.32404	0.296604	0.276632		0.350918	0.32344	0.334359	0.199763	0.269118	0.165868	0.349679	0.394038
49	0.392423	0.420909	0.390947	0.598152	0.451715	0.510601	0.356567	0.331864		0.258056	0.258024	0.275855	0.203929	0.282229	0.325178	0.29482	0.276986		0.349521	0.321067	0.333198	0.19792	0.266056	0.164221	0.348613	0.39115
50	0.394626	0.423149	0.393415	0.602727	0.454529	0.513805	0.358772	0.334159		0.257053	0.257825	0.273765	0.20147	0.283899	0.323381	0.294498	0.276095		0.348321	0.319026	0.33282	0.195803	0.261573	0.162814	0.34673	0.389746
51	0.396489	0.426166	0.396928	0.606096	0.457559	0.515991	0.361163	0.33586		0.255674	0.256583	0.271935	0.199877	0.279879	0.322902	0.2929	0.276175		0.347837	0.317251	0.331136	0.194027	0.262562	0.161107	0.345937	0.387965
52	0.399301	0.428362	0.399077	0.610284	0.460435	0.517967	0.363195	0.337687		0.254563	0.25554	0.27089	0.197305	0.276261	0.322693	0.291302	0.276244		0.346135	0.316098	0.330033	0.192411	0.263304	0.15934	0.345503	0.38607
53	0.401487	0.432045	0.400616	0.613448	0.462878	0.520153	0.365177	0.340027		0.255119	0.253521	0.271993	0.195256	0.275642	0.322333	0.290707	0.274988		0.343395	0.314434	0.327391	0.191296	0.26148	0.157513	0.344116	0.384985
54	0.403493	0.435061	0.403432	0.618228	0.464702	0.521142	0.366428	0.342459		0.255352	0.252035	0.270745	0.194619	0.275364	0.321914	0.290558	0.275033		0.341155	0.312903	0.325823	0.187153	0.259934	0.156944	0.343013	0.382508
55	0.40618	0.437435	0.403809	0.621438	0.467021	0.524495	0.367878	0.344833		0.25313	0.251348	0.271297	0.193982	0.274034	0.319698	0.289765	0.273595		0.34069	0.311218	0.324894	0.184581	0.258944	0.155806	0.342357	0.381572
56	0.407004	0.438633	0.405609	0.624237	0.468784	0.526352	0.3696	0.347197		0.254169	0.252301	0.270861	0.191933	0.271932	0.318351	0.289964	0.272465		0.338827	0.309066	0.323529	0.18383	0.259284	0.155297	0.340436	0.380339
57	0.408097	0.439986	0.407148	0.627037	0.470763	0.528298	0.370826	0.349389		0.253238	0.25259	0.271326	0.191614	0.270045	0.316015	0.290769	0.271837		0.338665	0.307424	0.321526	0.181348	0.259192	0.155687	0.338405	0.378775
58	0.409243	0.442803	0.408977	0.629951	0.473144	0.529766	0.372214	0.350553		0.254295	0.250793	0.269613	0.188837	0.269922	0.315476	0.288973	0.272202		0.336462	0.306404	0.32141	0.181212	0.256934	0.154758	0.338813	0.377245
59	0.41159	0.445487	0.41159	0.63291	0.47401	0.530514	0.37297	0.352471		0.251769	0.250305	0.269264	0.187016	0.268716	0.316314	0.289877	0.27178		0.336641	0.304208	0.319145	0.180074	0.257274	0.153171	0.337153	0.375749
60	0.412521	0.447727	0.413942	0.636119	0.475092	0.53297	0.374741	0.354937		0.254384	0.24924	0.267464	0.185969	0.268499	0.31317	0.289468	0.270307		0.333094	0.303032	0.318594	0.177911	0.256409	0.15386	0.33579	0.374756
61	0.414438	0.450389	0.416294	0.639215	0.477133	0.533838	0.375646	0.356592		0.253489	0.247599	0.265693	0.185969	0.268159	0.311972	0.289245	0.269588		0.332073	0.302012	0.318013	0.174816	0.254708	0.154189	0.335109	0.37382
62	0.415549	0.452319	0.418617	0.642311	0.477937	0.535096	0.376959	0.358853		0.254259	0.247532	0.265722	0.184626	0.268592	0.310355	0.28782	0.267715		0.330193	0.300149	0.315661	0.173063	0.253471	0.154549	0.335221	0.373432
63	0.417985	0.454493	0.419633	0.64527	0.47905	0.537162	0.377566	0.35915		0.252396	0.24649	0.266564	0.182373	0.268561	0.308768	0.288291	0.268218		0.329619	0.299017	0.313803	0.172357	0.252389	0.15407	0.334143	0.372633
64	0.420278	0.456645	0.421753	0.647933	0.480101	0.538749	0.378619	0.360326		0.252772	0.246822	0.264967	0.18062	0.268345	0.30775	0.287796	0.267578		0.32695	0.296533	0.31328	0.171447	0.251554	0.153501	0.333585	0.372096
65	0.422517	0.457843	0.422798	0.650483	0.480411	0.53851	0.37961	0.361638		0.250336	0.246711	0.265606	0.179277	0.267943	0.310146	0.28735	0.267373		0.327147	0.295446	0.311596	0.17024	0.251647	0.151345	0.33304	0.370989
66	0.423269	0.458952	0.424859	0.653123	0.481833	0.539199	0.380775	0.362803		0.249189	0.246201	0.264822	0.17691	0.265438	0.309307	0.286445	0.267658		0.327541	0.294847	0.310319	0.169967	0.252729	0.151494	0.33278	0.369539
67	0.424792	0.459906	0.426311	0.654876	0.481833	0.541055	0.381345	0.363865		0.247344	0.246401	0.263457	0.177502	0.268159	0.3076	0.286656	0.267636		0.327864	0.293694	0.310232	0.167623	0.250008	0.151345	0.331999	0.3685
68	0.425204	0.460771	0.428256	0.656469	0.483194	0.543271	0.381803	0.36576		0.246825	0.248176	0.261948	0.177661	0.267108	0.306852	0.287114	0.267304		0.327971	0.291054	0.309796	0.16587	0.249699	0.149877	0.331083	0.366936
69	0.42567	0.461702	0.430347	0.659064	0.484276	0.545667	0.382881	0.365828		0.24747	0.248331	0.261628	0.175407	0.26618	0.304905	0.286445	0.267419		0.326861	0.289967	0.308025	0.165529	0.249544	0.149428	0.330674	0.366753
70	0.428016	0.463144	0.432757	0.661363	0.484956	0.545248	0.38469	0.367575		0.245822	0.247732	0.257389	0.175089	0.267541	0.306103	0.285021	0.265375		0.326162	0.289124	0.309854	0.163548	0.247503	0.148649	0.33029	0.36705
71	0.429521	0.464253	0.435195	0.664186	0.486471	0.545427	0.385668	0.369139		0.245661	0.247399	0.256663	0.173291	0.266613	0.305414	0.285082	0.264724		0.324819	0.288348	0.308141	0.162524	0.246915	0.149159	0.329249	0.366137
72	0.431061	0.465784	0.435747	0.666371	0.487894	0.545936	0.386449	0.369938		0.245625	0.246379	0.257999	0.173108	0.266644	0.304965	0.28455	0.264496		0.323314	0.287837	0.306254	0.160521	0.245462	0.149099	0.329001	0.365566
73	0.431742	0.466804	0.437344	0.66867	0.487863	0.546625	0.387391	0.371639		0.245893	0.244005	0.256576	0.17213	0.268407	0.303617	0.284698	0.264108		0.322365	0.289191	0.30608	0.159201	0.24373	0.149757	0.327911	0.364253
74	0.431366	0.468867	0.437431	0.670673	0.487863	0.546416	0.388183	0.372244		0.246717	0.242186	0.25678	0.171151	0.269458	0.303887	0.285553	0.264222		0.321917	0.288947	0.305789	0.158176	0.242679	0.149698	0.326263	0.363534
75	0.432996	0.469289	0.437286	0.673199	0.489378	0.547254	0.38915	0.373683		0.247541	0.242719	0.258086	0.170263	0.268159	0.304186	0.28507	0.263548		0.319463	0.287993	0.304628	0.156537	0.242463	0.14856	0.32578	0.362769
76	0.433927	0.471263	0.438505	0.67477	0.490182	0.547853	0.389051	0.375019		0.246825	0.240301	0.258696	0.16933	0.271221	0.304306	0.28647	0.263035		0.319248	0.288436	0.302799	0.1559	0.238597	0.147841	0.324479	0.361947
77	0.434931	0.472261	0.439028	0.676204	0.491203	0.549021	0.39029	0.375681		0.246986	0.23999	0.260177	0.168784	0.270355	0.304546	0.286284	0.262898		0.318083	0.287749	0.300796	0.155012	0.238443	0.146433	0.323426	0.361422
78	0.434465	0.474834	0.44016	0.677137	0.492594	0.549739	0.390178	0.376857		0.24704	0.238903	0.259915	0.168465	0.27054	0.303857	0.285999	0.262909		0.318495	0.286263	0.299925	0.154398	0.236866	0.146404	0.323823	0.360234
79	0.436453	0.475056	0.441351	0.67848	0.493367	0.54926	0.391504	0.378032		0.245446	0.239968	0.260031	0.167281	0.270417	0.303917	0.285405	0.262532		0.318101	0.284976	0.298618	0.154238	0.236216	0.146823	0.323092	0.359435
80	0.437635	0.47632	0.442744	0.679755	0.494109	0.547853	0.393362	0.37922		0.245159	0.240279	0.258318	0.167441	0.270015	0.304456	0.28429	0.261699		0.317206	0.283401	0.298937	0.152804	0.235876	0.147691	0.322348	0.359081
81	0.438925	0.47632	0.443964	0.679937	0.494078	0.548572	0.394316	0.380384		0.243851	0.2409	0.25736	0.167828	0.267046	0.304097	0.28429	0.260831		0.317223	0.28278	0.298676	0.152235	0.238876	0.147332	0.321395	0.358784
82	0.440466	0.476897	0.445299	0.680529	0.495686	0.548931	0.394254	0.380795		0.243905	0.240767	0.25707	0.166371	0.264634	0.304636	0.284438	0.261037		0.315629	0.282336	0.297631	0.1531	0.23968	0.146433	0.321308	0.358168
83	0.440394	0.478361	0.445299	0.682282	0.496088	0.549111	0.393833	0.381994		0.243511	0.239192	0.256431	0.165779	0.264665	0.305324	0.284401	0.260306		0.316095	0.282447	0.29827	0.151939	0.239247	0.145565	0.321766	0.3577
84	0.441308	0.479337	0.447099	0.683488	0.495903	0.550458	0.393932	0.382747		0.242472	0.23948	0.255154	0.165642	0.264974	0.305564	0.284525	0.260261		0.31622	0.281183	0.297747	0.15087	0.239123	0.143978	0.321543	0.356992
85	0.441523	0.480136	0.44768	0.685036	0.496861	0.551267	0.394291	0.382862		0.242203	0.241033	0.256112	0.164891	0.263119	0.305234	0.284091	0.2605		0.316274	0.278831	0.296208	0.150073	0.24002	0.143499	0.321618	0.356638
86	0.442794	0.481866	0.448551	0.68606	0.497263	0.552854	0.394973	0.383033		0.240914	0.238859	0.255444	0.164186	0.262346	0.304636	0.284921	0.260523		0.316292	0.279275	0.296005	0.149754	0.240391	0.142511	0.320106	0.356444
87	0.442723	0.481245	0.449625	0.688291	0.498407	0.552554	0.394849	0.383158		0.242687	0.240855	0.253557	0.162251	0.260676	0.305414	0.285776	0.25953		0.31459	0.2779	0.296818	0.149458	0.240917	0.142032	0.319375	0.357312
88	0.443744	0.481733	0.449974	0.690294	0.500417	0.552704	0.395728	0.384369		0.242687	0.240168	0.253034	0.162	0.258078	0.305744	0.284934	0.25921		0.313569	0.278099	0.296992	0.147706	0.241504	0.141552	0.319338	0.356421
89	0.443493	0.482665	0.450264	0.691546	0.500387	0.554591	0.397413	0.384414		0.243439	0.23968	0.254283	0.161272	0.257244	0.303108	0.283967	0.259347		0.313068	0.277656	0.295453	0.147182	0.24237	0.142301	0.318619	0.356239
90	0.444675	0.483108	0.449596	0.692525	0.500696	0.555399	0.397946	0.385248		0.241272	0.239214	0.253905	0.160953	0.257738	0.300383	0.283695	0.258571		0.314053	0.277678	0.296498	0.146522	0.241566	0.144218	0.318359	0.356181
91	0.445732	0.484062	0.451571	0.693868	0.502984	0.555519	0.398776	0.385864		0.239642	0.240478	0.25315	0.160248	0.257738	0.299904	0.283707	0.258297		0.314626	0.27546	0.295279	0.145885	0.239278	0.144577	0.317517	0.355839
92	0.445213	0.486058	0.451629	0.695211	0.501809	0.555519	0.399049	0.386458		0.240197	0.238282	0.253324	0.158586	0.260398	0.300204	0.284091	0.257726		0.31459	0.275659	0.295047	0.146203	0.237793	0.144277	0.31686	0.355816
93	0.445893	0.486724	0.452645	0.696577	0.501964	0.555489	0.398813	0.387565		0.239391	0.238681	0.252889	0.156378	0.261975	0.301461	0.283621	0.257521		0.314716	0.274595	0.294466	0.147045	0.236062	0.14305	0.317566	0.354914
94	0.445822	0.487278	0.451745	0.697783	0.50317	0.555609	0.399779	0.387622		0.24043	0.237129	0.252628	0.155923	0.261325	0.301012	0.283162	0.258183		0.313748	0.275593	0.295627	0.146294	0.235505	0.143379	0.317058	0.354195
95	0.446467	0.486879	0.451977	0.698329	0.503417	0.554351	0.400114	0.388159		0.239391	0.238415	0.253615	0.156902	0.261202	0.30206	0.282444	0.258696		0.314142	0.274706	0.294408	0.144769	0.235381	0.143589	0.317442	0.353145
96	0.446252	0.489097	0.451077	0.699217	0.503881	0.555459	0.401353	0.388467		0.240555	0.235953	0.255589	0.156628	0.259161	0.300443	0.281514	0.260124		0.313193	0.27495	0.293334	0.144155	0.236958	0.144098	0.317133	0.351409
97	0.446485	0.488898	0.450613	0.699809	0.50453	0.554441	0.402406	0.389164		0.240967	0.237284	0.254834	0.156264	0.259315	0.301491	0.281316	0.259678		0.312548	0.273818	0.294553	0.143927	0.236154	0.144068	0.316278	0.351158
98	0.446377	0.488876	0.450148	0.700492	0.504778	0.55522	0.402121	0.389301		0.240143	0.238792	0.254486	0.156378	0.25712	0.300713	0.280672	0.260181		0.31348	0.272332	0.295366	0.14313	0.238103	0.144068	0.317207	0.350519
99	0.446108	0.489364	0.450293	0.701083	0.505365	0.556507	0.402815	0.389243		0.240752	0.237772	0.253818	0.15615	0.256285	0.300443	0.280945	0.260489		0.313139	0.272864	0.295889	0.142766	0.23835	0.14305	0.316241	0.350268
100	0.447488	0.49014	0.450874	0.702745	0.506447	0.556956	0.402988	0.390077		0.239212	0.238171	0.255734	0.156355	0.256254	0.300353	0.280932	0.259998		0.3133	0.271689	0.293392	0.1409	0.237299	0.14269	0.31608	0.349925
101	0.447864	0.490362	0.450235	0.703656	0.507189	0.557974	0.403323	0.390077		0.238961	0.238815	0.256983	0.156401	0.254893	0.299665	0.281192	0.259884		0.313175	0.270824	0.292782	0.139944	0.237917	0.142361	0.315485	0.350039
102	0.448258	0.491293	0.451484	0.704498	0.508086	0.556926	0.403979	0.390454		0.239695	0.237927	0.256605	0.156128	0.25613	0.300054	0.281502	0.26066		0.312047	0.270779	0.291911	0.139374	0.235783	0.14302	0.314519	0.348886
103	0.448831	0.492269	0.452326	0.705226	0.507375	0.556178	0.404463	0.391333		0.238764	0.236929	0.256199	0.155855	0.257738	0.299695	0.281254	0.260626		0.312405	0.270801	0.291476	0.138919	0.234887	0.144128	0.314283	0.348042
104	0.450031	0.491648	0.452471	0.705818	0.507653	0.556657	0.4059	0.391276		0.238943	0.236352	0.256344	0.154785	0.257491	0.299695	0.280387	0.26098		0.311026	0.271999	0.291185	0.139397	0.234856	0.143649	0.313713	0.347745
105	0.450264	0.492469	0.452935	0.706865	0.507004	0.556268	0.40611	0.39099		0.240412	0.23653	0.257099	0.154307	0.255667	0.299784	0.280214	0.260706		0.309324	0.271001	0.289966	0.138828	0.23733	0.143948	0.313676	0.348304
106	0.449781	0.492913	0.453081	0.707298	0.507004	0.555759	0.406185	0.39204		0.241648	0.236929	0.256141	0.153942	0.257336	0.300144	0.280895	0.260512		0.308571	0.270158	0.290779	0.13876	0.23566	0.144098	0.31292	0.347448
107	0.44953	0.493489	0.453139	0.707821	0.507313	0.555609	0.405825	0.39204		0.243314	0.236241	0.256344	0.153373	0.257336	0.300623	0.281031	0.260763		0.307156	0.270269	0.290517	0.138805	0.235351	0.143768	0.313143	0.347197
108	0.449816	0.493822	0.453052	0.708572	0.507066	0.5551	0.406308	0.392132		0.244084	0.235931	0.25585	0.152599	0.258975	0.300473	0.278467	0.260055		0.306099	0.270247	0.291098	0.138828	0.233959	0.144427	0.315225	0.347813
109	0.450605	0.494532	0.453981	0.708618	0.507746	0.55468	0.406308	0.392303		0.243439	0.234733	0.256373	0.152554	0.258048	0.300653	0.278814	0.260569		0.305956	0.270735	0.289646	0.138828	0.234206	0.144667	0.314878	0.347128
110	0.450748	0.495464	0.453777	0.708572	0.508674	0.554351	0.405999	0.392143		0.244263	0.234312	0.258464	0.153942	0.256501	0.300264	0.279235	0.260432		0.304989	0.270225	0.287759	0.137485	0.234825	0.145385	0.314766	0.347425
111	0.45064	0.495353	0.454823	0.70921	0.507963	0.555818	0.405169	0.392714		0.244192	0.234622	0.257651	0.154352	0.25579	0.299126	0.280387	0.258993		0.305168	0.270025	0.287527	0.136438	0.236247	0.145056	0.314444	0.348293
112	0.450891	0.495885	0.454794	0.710052	0.508952	0.556178	0.40559	0.393182		0.242508	0.234068	0.257273	0.154534	0.255636	0.298916	0.279545	0.257977		0.306601	0.270047	0.287933	0.135414	0.235412	0.144906	0.314866	0.348841
113	0.451446	0.495885	0.455694	0.710302	0.508148	0.556327	0.406172	0.393479		0.243009	0.233779	0.258376	0.154762	0.258419	0.298137	0.279049	0.25776		0.305544	0.270336	0.28593	0.134936	0.233433	0.145535	0.314779	0.348761
114	0.452181	0.496063	0.456071	0.711304	0.508921	0.556717	0.405602	0.393719		0.242239	0.234866	0.257273	0.154785	0.255914	0.298646	0.279755	0.257772		0.30558	0.269071	0.286656	0.133911	0.235165	0.144637	0.314643	0.34851
115	0.4527	0.495686	0.455868	0.711691	0.508024	0.555998	0.405664	0.393936		0.243708	0.235221	0.257302	0.153988	0.257244	0.301072	0.279557	0.258754		0.303592	0.269093	0.28683	0.134321	0.234732	0.14293	0.314779	0.347311
116	0.4515	0.496972	0.456042	0.712374	0.508983	0.556208	0.405726	0.394221		0.244711	0.234711	0.256025	0.153988	0.25613	0.300982	0.280622	0.258776		0.303789	0.268317	0.287933	0.133638	0.234887	0.14281	0.313651	0.347003
117	0.450587	0.496484	0.456071	0.711577	0.508767	0.555309	0.404537	0.393719		0.246341	0.234955	0.254254	0.154944	0.256007	0.301881	0.280845	0.258742		0.303072	0.268561	0.289675	0.133479	0.235227	0.14281	0.314618	0.347539
118	0.451106	0.497771	0.456681	0.71251	0.50957	0.555938	0.40533	0.394016		0.245159	0.233624	0.254892	0.153487	0.256099	0.300803	0.27978	0.258685		0.303735	0.268605	0.288427	0.134003	0.23433	0.143259	0.31489	0.347299
119	0.451339	0.497771	0.456274	0.712715	0.510189	0.555579	0.405416	0.394426		0.244496	0.234267	0.255763	0.153419	0.256038	0.3023	0.279483	0.258594		0.304165	0.267962	0.287962	0.133866	0.233773	0.142121	0.315101	0.34698
120	0.450193	0.497926	0.455897	0.713648	0.510746	0.556357	0.405825	0.395454		0.245195	0.234312	0.256112	0.153032	0.256099	0.30212	0.279111	0.257429		0.304613	0.267762	0.287991	0.13332	0.233155	0.141522	0.315064	0.347117
121	0.450855	0.498702	0.456449	0.713785	0.511735	0.555369	0.406271	0.395865		0.243457	0.233934	0.255066	0.154261	0.254708	0.302959	0.277897	0.257886		0.305687	0.267363	0.288485	0.131954	0.233557	0.141672	0.315832	0.346249
122	0.451518	0.499346	0.457261	0.713876	0.511364	0.555639	0.407448	0.39695		0.242938	0.234334	0.253789	0.15392	0.25443	0.303528	0.27781	0.255979		0.305544	0.266321	0.28895	0.132204	0.234206	0.140834	0.314742	0.347071
123	0.45159	0.498591	0.458481	0.714081	0.511921	0.556417	0.407362	0.396573		0.243278	0.233624	0.253034	0.15244	0.253873	0.302839	0.278281	0.256995		0.305132	0.267785	0.288485	0.133479	0.234206	0.140744	0.314358	0.346432
124	0.452199	0.498547	0.458307	0.714764	0.513652	0.555788	0.407646	0.397246		0.242311	0.233668	0.25437	0.151507	0.251399	0.303528	0.279024	0.255762		0.30549	0.267785	0.287324	0.133729	0.234949	0.140684	0.313329	0.346991
125	0.452629	0.498503	0.458162	0.715811	0.513405	0.555279	0.40751	0.396698		0.243081	0.233602	0.255154	0.151348	0.253193	0.303078	0.278938	0.257281		0.30429	0.267896	0.286685	0.132842	0.233402	0.141642	0.313552	0.346021
126	0.4527	0.498636	0.458481	0.715993	0.513343	0.555519	0.408167	0.396767		0.241917	0.233646	0.255386	0.151325	0.252853	0.30209	0.278095	0.25792		0.305383	0.267718	0.286133	0.132682	0.233804	0.142391	0.313738	0.345313
127	0.451912	0.498835	0.458975	0.716903	0.513157	0.557525	0.408848	0.396813		0.24172	0.234844	0.253237	0.151552	0.252172	0.300503	0.277587	0.257269		0.306368	0.266321	0.287788	0.131544	0.23467	0.141972	0.313565	0.345918
128	0.451787	0.497859	0.458133	0.718679	0.512879	0.558484	0.409369	0.397657		0.242203	0.235975	0.25437	0.150209	0.253811	0.299126	0.277909	0.256938		0.30601	0.266165	0.287498	0.131112	0.23331	0.142391	0.312722	0.345404
129	0.450963	0.499057	0.458365	0.718451	0.512539	0.559352	0.408439	0.397886		0.242185	0.234822	0.253005	0.151234	0.254368	0.299395	0.278715	0.256094		0.306852	0.266121	0.28863	0.130315	0.233093	0.141253	0.312846	0.346021
130	0.451052	0.498725	0.458365	0.719339	0.51291	0.558633	0.40834	0.398		0.243403	0.236685	0.254486	0.150392	0.254213	0.300862	0.280399	0.256162		0.305544	0.26459	0.287149	0.13027	0.232877	0.140504	0.31126	0.345838
131	0.451626	0.499323	0.457668	0.719635	0.513992	0.557016	0.408006	0.398651		0.243332	0.236286	0.253499	0.150414	0.254028	0.303198	0.281688	0.254986		0.305043	0.264391	0.288833	0.129951	0.23198	0.139786	0.310306	0.346363
132	0.452127	0.500211	0.459178	0.72075	0.515013	0.556956	0.407969	0.398947		0.242579	0.236397	0.252134	0.148935	0.253718	0.303468	0.280598	0.254781		0.305293	0.263393	0.288688	0.130315	0.231269	0.139576	0.311434	0.346272
133	0.452181	0.500344	0.4588	0.720318	0.515167	0.557376	0.40813	0.398856		0.242436	0.235975	0.252541	0.150574	0.25378	0.303019	0.280635	0.255397		0.305383	0.263681	0.288659	0.129109	0.231052	0.139606	0.311236	0.345747
134	0.452772	0.499856	0.458336	0.720705	0.514673	0.557825	0.407956	0.398422		0.240394	0.236907	0.253179	0.150483	0.253811	0.301431	0.280003	0.254826		0.306834	0.263237	0.288485	0.128813	0.231516	0.140744	0.312041	0.346751
135	0.452432	0.500211	0.458162	0.722048	0.515013	0.557166	0.409084	0.397886		0.239893	0.236441	0.254312	0.150073	0.254584	0.301701	0.280288	0.256048		0.307676	0.263348	0.287527	0.127879	0.230403	0.141133	0.310628	0.346066
136	0.452897	0.499678	0.457697	0.722526	0.515446	0.556537	0.408229	0.398445		0.24009	0.237595	0.255357	0.149026	0.254399	0.3023	0.281279	0.255854		0.307013	0.262727	0.286946	0.128449	0.230156	0.141163	0.310492	0.345701
137	0.452432	0.499213	0.458249	0.723322	0.515971	0.556687	0.40839	0.399062		0.23957	0.237905	0.255212	0.147797	0.255512	0.302959	0.282208	0.254644		0.307998	0.262882	0.28654	0.128881	0.228517	0.140355	0.309402	0.346295
138	0.451393	0.50041	0.4579	0.723687	0.516002	0.556956	0.408935	0.399667		0.2412	0.237107	0.255821	0.147956	0.254368	0.301911	0.282307	0.253468		0.307407	0.262483	0.286278	0.128357	0.22963	0.141133	0.308758	0.346866
139	0.452056	0.499811	0.458423	0.723687	0.517023	0.556956	0.408353	0.4001		0.24009	0.238837	0.256228	0.147683	0.251801	0.301641	0.282592	0.253628		0.307855	0.261352	0.285349	0.128631	0.231176	0.141403	0.309055	0.346272
140	0.452038	0.500787	0.457726	0.724438	0.51826	0.557286	0.407832	0.400603		0.241236	0.236796	0.255328	0.146454	0.253286	0.300653	0.283658	0.253696		0.306726	0.262417	0.286946	0.129109	0.228455	0.142061	0.30851	0.345701
141	0.452826	0.501653	0.456971	0.724506	0.518074	0.558214	0.407523	0.40034		0.240806	0.236264	0.25556	0.146294	0.254461	0.301012	0.283038	0.254153		0.306368	0.262084	0.287469	0.1292	0.227465	0.140774	0.309439	0.345507
142	0.452539	0.501497	0.458162	0.724961	0.517548	0.558633	0.408662	0.401196		0.242132	0.234933	0.253557	0.145771	0.253842	0.300653	0.281341	0.253628		0.305329	0.26357	0.288282	0.129268	0.228609	0.140714	0.309997	0.345176
143	0.451858	0.500787	0.457436	0.724369	0.518167	0.558064	0.408439	0.401299		0.243009	0.234977	0.253092	0.146203	0.252574	0.301282	0.280746	0.253696		0.305132	0.264235	0.289472	0.129427	0.229259	0.140654	0.310814	0.345005
144	0.452056	0.500277	0.457726	0.723641	0.518383	0.557795	0.409232	0.401585		0.241881	0.234134	0.253034	0.146454	0.252234	0.30212	0.280759	0.254655		0.306064	0.265589	0.28924	0.129905	0.229382	0.140085	0.310009	0.34376
145	0.451661	0.50041	0.457813	0.724096	0.517672	0.558184	0.409951	0.400957		0.24403	0.233202	0.251495	0.147091	0.253842	0.300982	0.279235	0.255774		0.304308	0.266387	0.290692	0.128813	0.228486	0.140834	0.310814	0.343269
146	0.451823	0.501342	0.457378	0.72421	0.517332	0.559592	0.409728	0.401733		0.243529	0.233136	0.251495	0.14832	0.253564	0.299964	0.279111	0.254461		0.304648	0.265522	0.291127	0.12747	0.229104	0.140444	0.311161	0.343806
147	0.453202	0.50061	0.456013	0.724643	0.517332	0.56064	0.409629	0.401562		0.242472	0.232958	0.253934	0.147182	0.252543	0.299335	0.279545	0.254815		0.304326	0.266432	0.290053	0.128175	0.230125	0.140025	0.310827	0.343623
148	0.452969	0.501364	0.456942	0.725348	0.517085	0.559382	0.409418	0.402121		0.242956	0.23267	0.252918	0.146954	0.253193	0.300084	0.279668	0.255157		0.304075	0.265966	0.29014	0.127697	0.229723	0.140534	0.310913	0.342721
149	0.452718	0.500477	0.457581	0.725121	0.517425	0.558034	0.410273	0.401973		0.2424	0.232249	0.253963	0.148024	0.254028	0.301521	0.279099	0.254861		0.304881	0.267274	0.288456	0.126855	0.228548	0.140444	0.310628	0.343167
150	0.452593	0.499723	0.457958	0.724597	0.516868	0.557675	0.410967	0.401619		0.241272	0.231605	0.254457	0.148935	0.254708	0.302929	0.278269	0.25526		0.306135	0.268672	0.287585	0.126468	0.228424	0.139396	0.310765	0.343121
151	0.452432	0.499545	0.457291	0.724939	0.517146	0.557376	0.4114	0.402178		0.241146	0.231561	0.255908	0.147546	0.253749	0.303168	0.276683	0.254518		0.306422	0.268894	0.286801	0.127515	0.229104	0.139456	0.311917	0.343304
152	0.453148	0.501009	0.457523	0.724461	0.516095	0.557945	0.411252	0.402601		0.239857	0.230518	0.255241	0.148844	0.254615	0.301282	0.276869	0.253456		0.306995	0.268472	0.287237	0.126696	0.22929	0.140774	0.31188	0.343943
153	0.452593	0.501963	0.458307	0.723869	0.516373	0.557675	0.41114	0.402601		0.240018	0.229276	0.254341	0.148115	0.254522	0.301372	0.276001	0.253924		0.307389	0.268761	0.287353	0.128016	0.229104	0.140953	0.312859	0.343475
154	0.453363	0.502274	0.457929	0.724187	0.515508	0.557046	0.412168	0.40308		0.239337	0.229077	0.255241	0.147341	0.255759	0.301162	0.275754	0.253959		0.3073	0.26865	0.28683	0.128471	0.228733	0.141792	0.312078	0.342961
155	0.45245	0.502207	0.457581	0.724369	0.515539	0.55504	0.411462	0.403023		0.239373	0.229476	0.254718	0.146545	0.255667	0.301761	0.277166	0.255283		0.308177	0.268317	0.287701	0.129086	0.228795	0.143199	0.311372	0.341694
156	0.452002	0.501719	0.457261	0.72462	0.514889	0.554501	0.411512	0.403194		0.238925	0.229875	0.254341	0.14675	0.256223	0.302539	0.277017	0.255911		0.309073	0.268406	0.288398	0.128631	0.228888	0.14296	0.311471	0.340895
157	0.451482	0.502473	0.456826	0.724028	0.514765	0.554261	0.411945	0.402943		0.238316	0.231539	0.255008	0.146977	0.257769	0.303947	0.277203	0.256345		0.310202	0.265988	0.288166	0.128995	0.227465	0.141792	0.310851	0.340712
158	0.451841	0.501608	0.455694	0.724278	0.516219	0.555519	0.412305	0.40308		0.237761	0.233003	0.256692	0.148411	0.256471	0.302689	0.276893	0.255694		0.310399	0.265389	0.287614	0.12731	0.227311	0.141792	0.310802	0.341226
159	0.451446	0.501675	0.455723	0.724643	0.516621	0.555309	0.411599	0.402692		0.237671	0.23318	0.257244	0.146863	0.256223	0.302899	0.276708	0.256265		0.310882	0.265145	0.287033	0.128494	0.227156	0.141792	0.311694	0.341043
160	0.450981	0.502096	0.455113	0.725189	0.515971	0.55492	0.411276	0.402612		0.238012	0.233269	0.257767	0.145452	0.253657	0.30224	0.278207	0.255922		0.311008	0.264635	0.28712	0.129359	0.230372	0.14284	0.310517	0.341466
161	0.450515	0.50234	0.454677	0.725257	0.516126	0.553752	0.410855	0.402772		0.238334	0.233557	0.258347	0.146294	0.252512	0.303677	0.279012	0.254895		0.311151	0.264102	0.286975	0.128449	0.231362	0.142571	0.310133	0.342333
162	0.450408	0.501808	0.455229	0.724961	0.51591	0.553632	0.409963	0.402886		0.239176	0.234112	0.258318	0.147341	0.253409	0.303348	0.27947	0.254998		0.310416	0.26408	0.286453	0.127697	0.230681	0.14302	0.310567	0.342116
163	0.44944	0.502939	0.456507	0.725895	0.514487	0.553033	0.409616	0.40227		0.240537	0.233136	0.258057	0.14634	0.253657	0.304336	0.280424	0.256219		0.310022	0.263925	0.285436	0.127766	0.231856	0.14263	0.309959	0.341511
164	0.449476	0.502651	0.456158	0.726304	0.515291	0.552884	0.408935	0.402966		0.240896	0.231694	0.25797	0.145452	0.252203	0.304007	0.282171	0.255842		0.309628	0.265655	0.285872	0.128244	0.232506	0.14311	0.308894	0.341192
165	0.449064	0.503871	0.457755	0.726532	0.515198	0.553063	0.409344	0.402806		0.241612	0.230385	0.255734	0.145839	0.252822	0.303228	0.281874	0.255066		0.309324	0.265744	0.286511	0.127629	0.23198	0.143708	0.308783	0.342128
166	0.448795	0.503139	0.458626	0.72553	0.516188	0.553453	0.409914	0.402681		0.240806	0.231517	0.255125	0.146772	0.253687	0.303977	0.280511	0.254712		0.310399	0.265345	0.286249	0.127697	0.230125	0.142571	0.309575	0.342607
167	0.448007	0.503072	0.458249	0.725621	0.515817	0.55501	0.409914	0.402578		0.242221	0.232426	0.253789	0.147592	0.254399	0.30215	0.279842	0.255112		0.309772	0.264502	0.287962	0.126787	0.229784	0.14284	0.310244	0.34231
168	0.448294	0.503361	0.458655	0.726395	0.515353	0.555759	0.410038	0.402566		0.243189	0.231228	0.253382	0.145498	0.253595	0.303138	0.279272	0.255774		0.308518	0.265411	0.287962	0.128107	0.231052	0.141103	0.31069	0.34166
169	0.448777	0.502651	0.457523	0.725667	0.516095	0.555759	0.409517	0.402155		0.241827	0.231317	0.255792	0.145839	0.252729	0.302929	0.280536	0.256676		0.309395	0.266032	0.286685	0.128494	0.231176	0.141313	0.309947	0.341169
170	0.448939	0.502584	0.458742	0.726054	0.516342	0.557705	0.408749	0.402361		0.24163	0.231894	0.256054	0.146476	0.252636	0.301821	0.28092	0.256881		0.309431	0.265522	0.285204	0.12747	0.231021	0.140474	0.310331	0.340758
171	0.449333	0.503915	0.460107	0.726054	0.515848	0.557226	0.408799	0.40284		0.240788	0.228943	0.254428	0.147228	0.2531	0.300803	0.282245	0.256699		0.309879	0.267141	0.285465	0.126719	0.231052	0.141972	0.308956	0.340461
172	0.449709	0.503427	0.459991	0.726395	0.516528	0.555968	0.4087	0.403103		0.240358	0.229276	0.253499	0.145998	0.252667	0.30203	0.283125	0.255294		0.309933	0.267297	0.286511	0.127606	0.230805	0.142002	0.308175	0.341603
173	0.449816	0.503316	0.46031	0.726304	0.51659	0.556327	0.409592	0.403377		0.239337	0.230252	0.253963	0.145976	0.253966	0.299844	0.282245	0.255751		0.310846	0.266432	0.285727	0.12772	0.229444	0.143828	0.308163	0.340872
174	0.450318	0.504093	0.46002	0.726327	0.516219	0.555459	0.409455	0.403445		0.239463	0.230541	0.255212	0.145953	0.254368	0.300922	0.281106	0.255431		0.310219	0.265367	0.284769	0.12772	0.229413	0.143619	0.309439	0.341123
175	0.450622	0.502584	0.460658	0.726737	0.515786	0.554651	0.409678	0.40308		0.240143	0.231761	0.255386	0.146522	0.254924	0.301521	0.280697	0.255671		0.309234	0.265655	0.283956	0.126741	0.22929	0.143828	0.309625	0.341249
176	0.451088	0.503028	0.460194	0.727351	0.51693	0.553932	0.409802	0.403834		0.239158	0.232049	0.255299	0.14659	0.254584	0.30203	0.280139	0.255397		0.309754	0.264923	0.284507	0.126058	0.228486	0.144038	0.310059	0.340769
177	0.451429	0.504004	0.459962	0.727579	0.517487	0.5551	0.409753	0.403445		0.240197	0.230363	0.255792	0.145657	0.253038	0.300922	0.279569	0.256642		0.308374	0.265633	0.284246	0.126764	0.229475	0.143978	0.310678	0.339913
178	0.451912	0.504248	0.460194	0.728467	0.516342	0.55519	0.409901	0.404119		0.239337	0.23114	0.256286	0.14502	0.25443	0.300743	0.27978	0.256436		0.308751	0.264613	0.28352	0.126514	0.229228	0.144068	0.310319	0.339445
179	0.451733	0.504137	0.459729	0.729104	0.515075	0.555609	0.410236	0.404838		0.240824	0.231428	0.257767	0.143699	0.254646	0.300293	0.279346	0.254792		0.307443	0.264435	0.282504	0.127197	0.230279	0.144098	0.310418	0.34037
180	0.450802	0.504337	0.4597	0.729241	0.515384	0.556896	0.410607	0.405934		0.240949	0.231783	0.256692	0.142812	0.255141	0.299335	0.278008	0.254598		0.308249	0.263881	0.283607	0.127948	0.229475	0.143768	0.311384	0.339468
181	0.449476	0.503915	0.459642	0.728603	0.51526	0.557615	0.411066	0.405763		0.24249	0.233624	0.257302	0.142948	0.253595	0.297718	0.276571	0.253822		0.308034	0.262461	0.283056	0.128449	0.231145	0.144667	0.312363	0.340415
182	0.449888	0.504425	0.459381	0.728216	0.517116	0.557495	0.410756	0.405284		0.24197	0.231517	0.258318	0.142903	0.252049	0.299156	0.277178	0.253445		0.308142	0.264058	0.282301	0.128881	0.230836	0.143349	0.312066	0.341272
183	0.450855	0.503937	0.460426	0.728125	0.517827	0.557885	0.409864	0.405717		0.241451	0.232892	0.258667	0.143426	0.252049	0.299575	0.276782	0.252988		0.307694	0.263171	0.280907	0.128449	0.230125	0.142541	0.313354	0.341294
184	0.451232	0.503915	0.460426	0.727465	0.517734	0.558124	0.409443	0.404656		0.238979	0.234068	0.256983	0.143221	0.253687	0.300713	0.277426	0.254118		0.30979	0.262017	0.282591	0.129313	0.228578	0.141163	0.313131	0.341226
185	0.45064	0.503627	0.461036	0.727784	0.516899	0.557645	0.408167	0.404484		0.239015	0.233513	0.254979	0.144314	0.254893	0.301342	0.278975	0.254906		0.310345	0.26286	0.283985	0.127902	0.228207	0.141013	0.312859	0.340609
186	0.451357	0.503893	0.460746	0.727943	0.517332	0.558633	0.408514	0.404359		0.239337	0.233025	0.255008	0.144359	0.254739	0.300653	0.279309	0.254438		0.309306	0.263082	0.284246	0.127697	0.227929	0.140714	0.312177	0.341203
187	0.451679	0.504337	0.461849	0.727602	0.517487	0.559262	0.409108	0.404439		0.238173	0.232226	0.253586	0.144564	0.256223	0.300323	0.279879	0.253125		0.310148	0.263437	0.284565	0.127834	0.22629	0.140414	0.311013	0.342436
188	0.450013	0.503183	0.461617	0.728216	0.516899	0.559112	0.409517	0.403948		0.239893	0.233269	0.25495	0.145156	0.257553	0.299844	0.279904	0.253582		0.310094	0.263548	0.283433	0.126628	0.225548	0.141043	0.310579	0.34247
189	0.450193	0.501475	0.462168	0.727829	0.517146	0.558603	0.409034	0.403788		0.239857	0.235088	0.253905	0.145338	0.257058	0.301431	0.280003	0.252977		0.309951	0.263437	0.283927	0.126832	0.225795	0.139965	0.310963	0.343235
190	0.44996	0.501386	0.462517	0.728899	0.514858	0.558573	0.409307	0.404085		0.24043	0.234289	0.25347	0.144064	0.259748	0.301042	0.279718	0.253536		0.30961	0.264324	0.284014	0.127037	0.225393	0.140385	0.310975	0.342379
191	0.450031	0.501697	0.463823	0.729582	0.515137	0.558963	0.409567	0.403777		0.241039	0.234023	0.252366	0.143699	0.258913	0.300054	0.278516	0.254655		0.30893	0.26428	0.28381	0.126719	0.22595	0.140983	0.311917	0.341568
192	0.45021	0.501653	0.463155	0.729332	0.515322	0.559771	0.410719	0.403354		0.239212	0.232981	0.254428	0.14461	0.256594	0.299904	0.277426	0.255614		0.310578	0.265367	0.282417	0.126058	0.228084	0.140325	0.311855	0.341032
193	0.451303	0.502274	0.463446	0.728785	0.513838	0.559232	0.409852	0.403708		0.237116	0.232448	0.254195	0.14502	0.256594	0.300443	0.277711	0.256413		0.311581	0.265278	0.282359	0.126195	0.229568	0.140325	0.312437	0.339879
194	0.450963	0.503361	0.463446	0.729924	0.514333	0.558484	0.409616	0.403377		0.238298	0.231938	0.253382	0.143768	0.256285	0.298976	0.278541	0.256173		0.310739	0.264701	0.283172	0.126309	0.229382	0.142541	0.311843	0.34045
195	0.449942	0.502895	0.463533	0.729901	0.515044	0.559741	0.409616	0.403114		0.240394	0.23196	0.253237	0.14329	0.254306	0.298736	0.27786	0.255751		0.309664	0.265145	0.28323	0.12681	0.23065	0.141522	0.312524	0.341135
196	0.449727	0.50183	0.463155	0.728854	0.515137	0.559172	0.410149	0.403617		0.238298	0.23358	0.253412	0.144974	0.252636	0.298167	0.276584	0.2555		0.311975	0.26459	0.283433	0.126172	0.232227	0.14266	0.313267	0.340883
197	0.449798	0.501675	0.463301	0.729764	0.515539	0.558094	0.410583	0.404233		0.239337	0.234245	0.252279	0.144724	0.251987	0.300623	0.277637	0.254529		0.310864	0.26408	0.28442	0.125512	0.232475	0.141283	0.311781	0.341237
198	0.449655	0.502274	0.462488	0.729491	0.516404	0.558603	0.410855	0.404016		0.240412	0.234733	0.253237	0.144815	0.252822	0.300323	0.278355	0.25494		0.309933	0.262993	0.284275	0.125694	0.230774	0.141073	0.31079	0.341043
199	0.449189	0.502429	0.46182	0.72981	0.515291	0.557286	0.410558	0.404096		0.240537	0.233979	0.253499	0.144746	0.255419	0.30233	0.279185	0.254278		0.310273	0.263592	0.284681	0.125444	0.22929	0.140385	0.310257	0.341625
200	0.449154	0.503117	0.46362	0.730902	0.514209	0.558064	0.410236	0.404073		0.241773	0.235177	0.252366	0.143312	0.256316	0.301761	0.279507	0.255294		0.309073	0.261707	0.284014	0.125785	0.229475	0.140175	0.310257	0.340632
201	0.449028	0.502717	0.461762	0.731745	0.513559	0.558723	0.410793	0.404028		0.2424	0.235154	0.253208	0.142584	0.256842	0.301042	0.278938	0.255625		0.308571	0.262128	0.28503	0.125671	0.229599	0.140235	0.310269	0.340347
202	0.447147	0.503405	0.461152	0.731562	0.513559	0.561089	0.411252	0.404336		0.243959	0.233446	0.254921	0.144177	0.257522	0.298587	0.278553	0.255009		0.308894	0.263149	0.283927	0.12426	0.228919	0.140325	0.310195	0.340655
203	0.447022	0.502229	0.460455	0.732496	0.515477	0.560849	0.411276	0.403982		0.243815	0.234312	0.255125	0.142538	0.255265	0.298197	0.279445	0.255055		0.309163	0.263459	0.28442	0.124966	0.229259	0.140953	0.309278	0.340963
204	0.447488	0.501919	0.460165	0.731471	0.514363	0.560101	0.41145	0.404427		0.243601	0.235021	0.253731	0.14329	0.255728	0.299156	0.279495	0.255317		0.308912	0.26306	0.286104	0.125239	0.229908	0.140744	0.309055	0.340255
205	0.4467	0.502274	0.461036	0.731084	0.513157	0.559232	0.41197	0.404496		0.244317	0.234134	0.253557	0.144428	0.25579	0.299725	0.278368	0.25542		0.308983	0.263592	0.285407	0.124488	0.231052	0.141043	0.309662	0.340084
206	0.446467	0.501763	0.461704	0.730948	0.513776	0.558394	0.412156	0.40413		0.246198	0.235465	0.254486	0.145407	0.255667	0.299305	0.277686	0.256984		0.307335	0.262771	0.28381	0.123646	0.230558	0.142301	0.310158	0.338886
207	0.446717	0.50203	0.461878	0.730766	0.514425	0.558184	0.412045	0.404519		0.246341	0.234511	0.253847	0.145953	0.255728	0.299365	0.278541	0.257304		0.306941	0.263459	0.284275	0.123281	0.229846	0.142451	0.309414	0.338178
208	0.446825	0.502651	0.462401	0.730811	0.513621	0.557346	0.412652	0.404165		0.245123	0.233424	0.252686	0.145725	0.255636	0.298916	0.279148	0.257429		0.308052	0.263925	0.284914	0.123464	0.230743	0.143738	0.3082	0.338406
209	0.44695	0.503006	0.462488	0.730629	0.512786	0.556687	0.413593	0.404245		0.245714	0.233336	0.251873	0.145953	0.257429	0.298766	0.277488	0.257555		0.307335	0.263659	0.28564	0.123418	0.229784	0.144547	0.308919	0.338201
210	0.447434	0.502695	0.462052	0.732177	0.51325	0.555429	0.412515	0.404051		0.243529	0.234556	0.251089	0.143358	0.255667	0.299665	0.278987	0.257212		0.309037	0.262749	0.286859	0.124465	0.231083	0.144906	0.308498	0.338737
211	0.447828	0.503161	0.460891	0.731858	0.514271	0.555998	0.411648	0.403571		0.243206	0.23247	0.252424	0.144177	0.254399	0.298766	0.278368	0.257532		0.308966	0.264369	0.286685	0.123964	0.231331	0.145236	0.309984	0.338897
212	0.448903	0.503427	0.460949	0.731403	0.515075	0.556118	0.411648	0.402943		0.24172	0.232515	0.252163	0.144359	0.25412	0.299156	0.278442	0.257406		0.309378	0.264058	0.286888	0.124237	0.230805	0.144727	0.30991	0.33965
213	0.449046	0.50254	0.460281	0.73113	0.516281	0.556387	0.411822	0.402578		0.243117	0.233846	0.25286	0.143813	0.251337	0.298976	0.278702	0.25808		0.307837	0.263614	0.286859	0.125057	0.232382	0.144637	0.309476	0.339342
214	0.448706	0.502252	0.462197	0.73113	0.515477	0.556088	0.411537	0.402932		0.242866	0.235243	0.253179	0.144064	0.253502	0.300503	0.279346	0.257509		0.308428	0.262505	0.284623	0.124807	0.231021	0.143409	0.309117	0.339559
215	0.447989	0.503183	0.461936	0.731949	0.515971	0.555938	0.412168	0.402989		0.24197	0.234312	0.253702	0.14313	0.251987	0.299275	0.277228	0.256961		0.31004	0.262505	0.284362	0.12492	0.232042	0.144786	0.310604	0.34005
216	0.448652	0.504692	0.462691	0.73154	0.515229	0.558004	0.412602	0.403171		0.24	0.232204	0.254021	0.143813	0.253409	0.298257	0.277723	0.256562		0.311348	0.263104	0.283288	0.124647	0.231362	0.143738	0.309675	0.340267
217	0.448849	0.504869	0.461559	0.731995	0.515322	0.558514	0.412268	0.402829		0.241576	0.231872	0.25405	0.142447	0.252976	0.298467	0.278752	0.257498		0.309575	0.263259	0.284391	0.125558	0.231702	0.14302	0.308981	0.339673
218	0.44833	0.504093	0.461646	0.73245	0.515941	0.558603	0.412429	0.40356		0.241272	0.231628	0.254428	0.140763	0.252389	0.297778	0.27646	0.2576		0.310399	0.26428	0.283927	0.126787	0.231671	0.143619	0.311112	0.33884
219	0.448365	0.504603	0.461907	0.733133	0.515755	0.558933	0.412503	0.403856		0.242508	0.23145	0.254805	0.140285	0.253718	0.298377	0.277215	0.25639		0.309127	0.263947	0.283288	0.126582	0.230527	0.14269	0.310282	0.339753
220	0.448831	0.504891	0.461965	0.73245	0.515631	0.558394	0.412391	0.405306		0.243403	0.232116	0.253934	0.140672	0.255172	0.299814	0.276534	0.255568		0.307765	0.262993	0.284101	0.126878	0.229197	0.141792	0.311074	0.339125
221	0.448688	0.504425	0.461675	0.732268	0.516899	0.558334	0.412416	0.405341		0.243386	0.23236	0.254457	0.140194	0.254924	0.301042	0.276968	0.25558		0.307927	0.263215	0.283869	0.127538	0.228177	0.140624	0.310616	0.33908
222	0.449172	0.505601	0.461762	0.731767	0.517518	0.559202	0.412466	0.405192		0.242239	0.231694	0.25405	0.141195	0.254182	0.300144	0.277426	0.254587		0.308589	0.262705	0.284188	0.127037	0.2283	0.140654	0.310108	0.340221
223	0.448598	0.505668	0.462197	0.732086	0.518569	0.558783	0.412094	0.405866		0.241379	0.233424	0.252773	0.140717	0.252141	0.300084	0.278058	0.254495		0.310022	0.260908	0.28503	0.127197	0.22929	0.141133	0.309848	0.339639
224	0.44876	0.50569	0.461123	0.731813	0.518538	0.557945	0.411636	0.40558		0.240376	0.23338	0.254312	0.141651	0.252853	0.300084	0.279037	0.2551		0.310864	0.26093	0.284565	0.126536	0.228609	0.141972	0.309328	0.339319
225	0.448706	0.5064	0.460542	0.73204	0.519373	0.556926	0.411747	0.405889		0.241523	0.233047	0.255531	0.141309	0.253873	0.301581	0.277884	0.254735		0.309772	0.260553	0.283927	0.12665	0.226754	0.141492	0.310368	0.339376
226	0.448652	0.5062	0.459149	0.732336	0.517858	0.558454	0.411908	0.40582		0.241684	0.233092	0.258609	0.141378	0.254553	0.300533	0.278541	0.25405		0.309664	0.260709	0.282243	0.126286	0.227589	0.141013	0.309551	0.34013
227	0.448168	0.505202	0.459062	0.732086	0.51792	0.557196	0.411772	0.406014		0.242024	0.2344	0.258638	0.14156	0.254522	0.301731	0.279037	0.254107		0.309807	0.260398	0.282301	0.126354	0.227558	0.141073	0.309191	0.339879
228	0.447721	0.504403	0.459439	0.731972	0.518909	0.557046	0.41254	0.406471		0.242669	0.234866	0.258376	0.140877	0.251708	0.30197	0.277736	0.253662		0.30961	0.260731	0.282185	0.127151	0.229382	0.140983	0.309724	0.339867
229	0.447613	0.503893	0.458858	0.731927	0.519435	0.556417	0.412367	0.406642		0.242239	0.235753	0.257825	0.140399	0.251306	0.302749	0.277946	0.253045		0.310148	0.260354	0.283317	0.127675	0.229259	0.140834	0.309687	0.340313
230	0.447756	0.503804	0.458336	0.731745	0.519187	0.558214	0.412329	0.407076		0.241809	0.236219	0.257418	0.140922	0.250688	0.301431	0.277959	0.253034		0.310434	0.259976	0.284246	0.127333	0.230125	0.140355	0.309712	0.33989
231	0.448133	0.502052	0.458191	0.732018	0.51792	0.558543	0.412664	0.406334		0.242579	0.236796	0.25678	0.140171	0.252543	0.301222	0.276893	0.254587		0.309288	0.261152	0.28503	0.127811	0.229537	0.140235	0.310443	0.33908
232	0.448491	0.500632	0.458684	0.731836	0.519528	0.558963	0.412627	0.40614		0.242508	0.23724	0.256518	0.140968	0.251121	0.301911	0.276856	0.255945		0.309001	0.262128	0.284798	0.127197	0.229352	0.139127	0.310517	0.337915
233	0.448957	0.501142	0.458133	0.731062	0.520084	0.558633	0.413085	0.406185		0.24172	0.236264	0.257157	0.141582	0.251214	0.300952	0.276596	0.255317		0.309324	0.262594	0.284711	0.127356	0.228702	0.140414	0.310319	0.338497
234	0.448849	0.50163	0.458916	0.731039	0.520022	0.558484	0.413581	0.40638		0.241738	0.23491	0.255967	0.142721	0.250131	0.300443	0.276881	0.255854		0.309413	0.263459	0.285117	0.126241	0.229846	0.141073	0.309538	0.337767
235	0.447649	0.501741	0.45822	0.730971	0.519342	0.559023	0.413668	0.405512		0.24335	0.233069	0.257157	0.143563	0.250966	0.298946	0.276212	0.255625		0.309001	0.265189	0.284623	0.125467	0.229692	0.142032	0.310121	0.338863
236	0.447506	0.501741	0.458655	0.731335	0.51826	0.559472	0.413234	0.405877		0.244335	0.232493	0.256576	0.143108	0.250781	0.29664	0.277191	0.254986		0.308159	0.265766	0.284769	0.125558	0.23096	0.143888	0.309575	0.339137
237	0.447703	0.501586	0.457871	0.731631	0.517796	0.558873	0.413184	0.405683		0.243117	0.232781	0.25675	0.142607	0.252018	0.297598	0.27843	0.25357		0.30918	0.265633	0.285378	0.125763	0.230186	0.143529	0.308386	0.340746
238	0.448258	0.50163	0.457349	0.732177	0.518198	0.557256	0.412515	0.406197		0.241773	0.23369	0.258318	0.143199	0.251554	0.299485	0.278046	0.254621		0.309969	0.264679	0.284333	0.124624	0.230248	0.143259	0.309439	0.339182
239	0.448133	0.501275	0.457378	0.731904	0.518414	0.557705	0.412689	0.406711		0.242938	0.234533	0.257999	0.142493	0.251987	0.298916	0.27755	0.253422		0.30893	0.264191	0.284623	0.125603	0.229599	0.143379	0.309761	0.339867
240	0.44876	0.502717	0.459178	0.73179	0.518136	0.556777	0.412912	0.406722		0.241845	0.232692	0.255473	0.142516	0.251708	0.301671	0.277946	0.253799		0.309395	0.26459	0.285349	0.125694	0.230156	0.141552	0.309142	0.339479
241	0.448025	0.502717	0.459904	0.731267	0.516683	0.555759	0.413519	0.406756		0.242526	0.231605	0.25495	0.142493	0.252482	0.302869	0.278293	0.254096		0.309449	0.265677	0.285146	0.126241	0.230836	0.141373	0.308188	0.339148
242	0.448545	0.502518	0.459962	0.731107	0.516435	0.553692	0.413321	0.405615		0.242257	0.233269	0.255386	0.141696	0.253224	0.305803	0.276695	0.254278		0.309198	0.264213	0.284652	0.127197	0.230341	0.140504	0.309984	0.340107
243	0.448365	0.502651	0.460194	0.730219	0.517456	0.554321	0.41254	0.405398		0.241469	0.234267	0.254283	0.143062	0.254491	0.304875	0.276893	0.254621		0.310166	0.263082	0.285523	0.126719	0.228053	0.140804	0.310567	0.339982
244	0.448419	0.503139	0.459729	0.72965	0.518198	0.554351	0.412949	0.405158		0.242311	0.232981	0.253528	0.144382	0.255759	0.304276	0.276336	0.254096		0.30927	0.263881	0.286743	0.125967	0.226043	0.141373	0.310715	0.340746
245	0.44833	0.502806	0.46031	0.729741	0.519095	0.553063	0.413271	0.405432		0.242472	0.234533	0.253295	0.143176	0.254739	0.306402	0.275357	0.255009		0.309198	0.262661	0.286395	0.127083	0.226167	0.140534	0.311372	0.339559
246	0.449548	0.503205	0.460165	0.729514	0.519466	0.554112	0.413383	0.405135		0.241863	0.235443	0.254573	0.143699	0.254708	0.305354	0.275444	0.253947		0.308589	0.261352	0.285262	0.126787	0.225826	0.140534	0.311174	0.340918
247	0.449261	0.502828	0.460891	0.72965	0.519806	0.552465	0.412887	0.405204		0.243081	0.235665	0.251989	0.14288	0.253873	0.305923	0.276646	0.253182		0.307658	0.261507	0.28712	0.12747	0.226321	0.141612	0.310467	0.341614
248	0.450515	0.502828	0.460833	0.72915	0.520301	0.551177	0.413767	0.40453		0.242132	0.235288	0.251873	0.143449	0.252172	0.306342	0.275332	0.254187		0.307353	0.261884	0.287295	0.127401	0.227527	0.142481	0.310901	0.341283
249	0.451339	0.502362	0.461326	0.729696	0.520548	0.550668	0.41399	0.40356		0.24283	0.23531	0.250915	0.143108	0.252698	0.30763	0.275097	0.255842		0.305831	0.262328	0.287759	0.127197	0.226754	0.141702	0.310913	0.340598
250	0.45202	0.503582	0.461762	0.729741	0.521445	0.551117	0.413407	0.403811		0.241863	0.235909	0.25106	0.144041	0.251925	0.307331	0.274738	0.255614		0.306117	0.260509	0.287178	0.126218	0.22663	0.141552	0.311855	0.340575
251	0.451912	0.503272	0.461849	0.729172	0.520641	0.551866	0.413085	0.404382		0.240878	0.235021	0.250915	0.145065	0.252265	0.306582	0.276472	0.255089		0.30721	0.261707	0.287237	0.125763	0.227094	0.141552	0.310443	0.340529
252	0.452826	0.503582	0.462633	0.729673	0.520548	0.554501	0.413011	0.404507		0.240949	0.23562	0.24926	0.144564	0.253162	0.305983	0.276732	0.25534		0.306225	0.260797	0.288108	0.125763	0.22629	0.139516	0.310257	0.340153
253	0.452073	0.503582	0.4615	0.730402	0.520857	0.555339	0.412255	0.404393		0.242418	0.235975	0.249985	0.144177	0.252482	0.303887	0.275716	0.255363		0.305508	0.260442	0.288514	0.125421	0.226661	0.140774	0.312028	0.340244
254	0.452826	0.503538	0.4606	0.730811	0.520733	0.554411	0.4128	0.403685		0.24129	0.234644	0.250479	0.143859	0.251678	0.304246	0.276546	0.255294		0.305884	0.261818	0.288921	0.12533	0.227589	0.141343	0.310653	0.34102
255	0.451912	0.503627	0.460223	0.731517	0.521816	0.55483	0.412899	0.404062		0.240376	0.235399	0.249869	0.143244	0.250874	0.303797	0.277438	0.253913		0.307712	0.260975	0.289908	0.125239	0.227311	0.141373	0.309662	0.342025
256	0.452324	0.503516	0.45941	0.731676	0.521166	0.554411	0.412726	0.403799		0.239785	0.235665	0.250363	0.142698	0.251925	0.304186	0.277228	0.254986		0.307891	0.260819	0.290227	0.125626	0.226909	0.141403	0.310046	0.341214
257	0.45193	0.503826	0.459729	0.731175	0.523516	0.556028	0.413184	0.403959		0.239803	0.235576	0.249405	0.143449	0.251708	0.302989	0.276212	0.254358		0.308267	0.260598	0.290866	0.125376	0.224775	0.140983	0.310604	0.341683
258	0.452253	0.503893	0.459933	0.731062	0.523764	0.556327	0.412937	0.404541		0.238155	0.235243	0.24984	0.144109	0.250781	0.30194	0.275778	0.254084		0.309592	0.260864	0.290227	0.124829	0.225455	0.141732	0.311285	0.341374
259	0.451375	0.503782	0.460455	0.731585	0.524568	0.555489	0.412912	0.404222		0.238083	0.234578	0.24955	0.143494	0.250379	0.302869	0.276646	0.254552		0.310542	0.26164	0.289995	0.12492	0.225053	0.141642	0.310443	0.341226
260	0.45159	0.504669	0.460368	0.731039	0.524382	0.556208	0.413011	0.404325		0.237349	0.232271	0.250421	0.143768	0.251585	0.301192	0.277438	0.255169		0.311061	0.26306	0.289211	0.125193	0.224033	0.1426	0.309551	0.340507
261	0.451966	0.505069	0.459323	0.730857	0.524197	0.556807	0.413197	0.404085		0.239319	0.23196	0.253353	0.144223	0.250904	0.300533	0.278145	0.254883		0.308715	0.262971	0.287324	0.12492	0.224899	0.14266	0.308659	0.341032
262	0.451966	0.50478	0.458945	0.730128	0.523547	0.556327	0.412652	0.404165		0.239194	0.231628	0.254631	0.145657	0.251956	0.301641	0.277798	0.255614		0.30884	0.263592	0.286424	0.124215	0.224497	0.142032	0.309551	0.340221
263	0.451464	0.503472	0.458975	0.730402	0.523145	0.555399	0.412813	0.404176		0.240018	0.232537	0.255938	0.144746	0.252296	0.301881	0.277092	0.255945		0.308518	0.263991	0.285088	0.124852	0.224559	0.14272	0.310096	0.339879
264	0.451608	0.504558	0.459758	0.73047	0.522094	0.5548	0.412354	0.403685		0.239767	0.231849	0.254631	0.143608	0.252945	0.302539	0.27869	0.256916		0.308625	0.263592	0.285611	0.125922	0.224961	0.14266	0.308956	0.339399
265	0.450945	0.505379	0.460049	0.729878	0.521939	0.555669	0.412032	0.403628		0.240788	0.229187	0.255299	0.143586	0.251306	0.301252	0.27864	0.256824		0.308267	0.265433	0.284652	0.126536	0.226754	0.14308	0.309328	0.339548
266	0.451124	0.504403	0.459265	0.729559	0.521599	0.556327	0.412354	0.403719		0.240734	0.231494	0.254805	0.144246	0.251492	0.300264	0.278417	0.256676		0.308142	0.264102	0.28593	0.126195	0.226909	0.143409	0.309229	0.339605
267	0.452754	0.504581	0.458684	0.729354	0.521445	0.556417	0.412404	0.40332		0.239409	0.231428	0.255763	0.14486	0.25208	0.299754	0.277154	0.257338		0.307837	0.263991	0.285553	0.125785	0.226476	0.143828	0.310443	0.339342
268	0.453094	0.503915	0.458133	0.728785	0.52095	0.55522	0.412862	0.404108		0.238137	0.231849	0.256721	0.146203	0.253904	0.301641	0.27589	0.256253		0.308768	0.264235	0.285146	0.125011	0.225146	0.143139	0.311248	0.339639
269	0.453094	0.504204	0.458162	0.729423	0.520857	0.55492	0.41306	0.404267		0.238567	0.231716	0.254312	0.14502	0.252822	0.303228	0.275778	0.256539		0.308339	0.26408	0.287527	0.125558	0.226321	0.141852	0.311161	0.339194
270	0.45322	0.503516	0.458655	0.729127	0.521321	0.555279	0.412775	0.404051		0.238746	0.231361	0.255008	0.144496	0.251585	0.30227	0.276262	0.257121		0.308034	0.265123	0.286336	0.126377	0.227094	0.142451	0.310963	0.338828
271	0.453399	0.503161	0.4597	0.729764	0.521074	0.55519	0.412329	0.404541		0.238943	0.231827	0.253644	0.143654	0.253564	0.30239	0.277166	0.257178		0.307658	0.265012	0.286656	0.126582	0.225363	0.142421	0.310505	0.33828
272	0.453668	0.502185	0.460252	0.729332	0.521074	0.555669	0.412255	0.404724		0.23837	0.232892	0.251437	0.143586	0.254955	0.301372	0.277686	0.256584		0.307962	0.264923	0.288311	0.127083	0.223971	0.14296	0.310059	0.338691
273	0.453954	0.501941	0.46002	0.729036	0.521785	0.55501	0.411871	0.404153		0.238245	0.23236	0.25257	0.144246	0.253131	0.301611	0.278269	0.256801		0.307801	0.2657	0.287411	0.126719	0.225084	0.143379	0.30986	0.339045
274	0.452772	0.502296	0.458916	0.729059	0.523115	0.555729	0.411685	0.403697		0.239588	0.232071	0.254718	0.14461	0.249791	0.301132	0.277377	0.257578		0.30764	0.265633	0.286365	0.126332	0.227094	0.143139	0.310938	0.338726
275	0.45245	0.50163	0.459468	0.728763	0.523053	0.556597	0.411983	0.403457		0.23991	0.233757	0.253382	0.144041	0.250564	0.299964	0.276708	0.257806		0.30764	0.264613	0.287149	0.127197	0.226383	0.143439	0.31131	0.338737
276	0.452647	0.501564	0.46002	0.729059	0.521537	0.557106	0.411338	0.403765		0.240609	0.232626	0.252541	0.143904	0.251214	0.300713	0.277438	0.257372		0.306744	0.26581	0.28744	0.127037	0.227249	0.142181	0.311223	0.338863
277	0.451841	0.501941	0.461152	0.729491	0.520331	0.557406	0.411004	0.40348		0.240573	0.231184	0.252395	0.143426	0.251337	0.298916	0.27729	0.257521		0.307586	0.266875	0.286453	0.127083	0.228331	0.143679	0.311706	0.339
278	0.451429	0.501519	0.461036	0.729377	0.520919	0.558454	0.410917	0.403354		0.240663	0.232315	0.252831	0.143631	0.252234	0.298077	0.276348	0.257075		0.307909	0.266165	0.286133	0.126992	0.226847	0.143469	0.312735	0.339571
279	0.451339	0.500898	0.46121	0.72899	0.520424	0.558514	0.411289	0.403525		0.241182	0.233624	0.253353	0.144086	0.253502	0.298167	0.275134	0.256995		0.307479	0.265478	0.285436	0.126923	0.226074	0.143319	0.313577	0.339479
280	0.452485	0.501497	0.460194	0.729218	0.521135	0.559232	0.410013	0.403366		0.240627	0.233779	0.254166	0.143881	0.25344	0.298527	0.277352	0.257007		0.306888	0.264723	0.28564	0.126901	0.225424	0.142241	0.312636	0.339628
281	0.4515	0.502074	0.45941	0.729013	0.522527	0.559681	0.410595	0.403137		0.241576	0.23369	0.255357	0.144587	0.251152	0.297329	0.27667	0.257669		0.306923	0.264235	0.285233	0.1264	0.226321	0.14299	0.312735	0.339194
282	0.45039	0.502429	0.459294	0.729081	0.522125	0.559502	0.410979	0.403777		0.241523	0.23318	0.254283	0.144769	0.253502	0.297509	0.277897	0.257886		0.308088	0.264391	0.286424	0.12615	0.224373	0.14299	0.311124	0.338338
283	0.449709	0.502229	0.460629	0.728626	0.521074	0.559801	0.41114	0.403845		0.242526	0.231694	0.254399	0.145338	0.25378	0.29682	0.277884	0.25687		0.307765	0.266077	0.284972	0.126036	0.225146	0.143379	0.310975	0.339285
284	0.449834	0.503316	0.460223	0.727966	0.520579	0.561388	0.411338	0.40413		0.242365	0.232049	0.254892	0.145361	0.252853	0.294484	0.277649	0.257007		0.307801	0.264635	0.284885	0.126673	0.226569	0.144128	0.311013	0.338863
285	0.449566	0.502695	0.460542	0.727852	0.521537	0.560789	0.411983	0.403811		0.242956	0.233247	0.253702	0.144837	0.252729	0.295293	0.276695	0.257623		0.307479	0.264058	0.285756	0.12731	0.225734	0.143918	0.311322	0.338566
286	0.449673	0.503117	0.461065	0.72742	0.522249	0.561209	0.412664	0.404245		0.242454	0.231982	0.254544	0.145315	0.252265	0.295532	0.27667	0.257167		0.307873	0.264901	0.284391	0.127265	0.225486	0.143259	0.310666	0.338589
287	0.449816	0.502939	0.46272	0.727215	0.521847	0.56052	0.412887	0.405432		0.24206	0.231694	0.251989	0.145885	0.252451	0.297449	0.27641	0.256253		0.308124	0.265367	0.285291	0.126901	0.225703	0.142032	0.310703	0.338315
288	0.45082	0.503693	0.46272	0.727329	0.520919	0.561059	0.412875	0.405204		0.240842	0.231428	0.253324	0.145452	0.251987	0.297509	0.275654	0.256333		0.308339	0.264879	0.283956	0.127219	0.227094	0.141433	0.311471	0.338463
289	0.450264	0.50396	0.462894	0.727579	0.521228	0.561239	0.413036	0.403993		0.24077	0.230518	0.252395	0.14461	0.251368	0.298048	0.275939	0.256973		0.308966	0.265522	0.284711	0.127811	0.227403	0.140714	0.311025	0.339034
290	0.450282	0.504292	0.46333	0.728034	0.520084	0.558963	0.413321	0.403971		0.241809	0.231428	0.249927	0.144701	0.253038	0.300084	0.275159	0.256938		0.307909	0.26428	0.286743	0.127265	0.226878	0.140953	0.31152	0.339091
291	0.45021	0.504869	0.463939	0.727784	0.520362	0.557765	0.413791	0.403571		0.241487	0.231827	0.247663	0.145885	0.252265	0.300832	0.275778	0.257509		0.308303	0.263304	0.288398	0.126332	0.227373	0.141403	0.31043	0.33892
292	0.450246	0.504425	0.464433	0.727055	0.520115	0.558094	0.412986	0.40364		0.242579	0.232958	0.246501	0.145543	0.251337	0.299874	0.276237	0.25679		0.307174	0.262616	0.289066	0.127401	0.228548	0.142032	0.310777	0.339571
293	0.450103	0.50518	0.462952	0.726646	0.520239	0.557705	0.412453	0.403925		0.242741	0.232116	0.249289	0.145816	0.251276	0.300922	0.275357	0.256173		0.307156	0.262705	0.287759	0.127538	0.228486	0.141373	0.31219	0.339902
294	0.450121	0.505157	0.464143	0.726919	0.518971	0.558753	0.412429	0.404108		0.240967	0.232892	0.249666	0.145452	0.252203	0.299515	0.275816	0.256368		0.308912	0.261951	0.286191	0.127629	0.228826	0.141732	0.311756	0.339525
295	0.450139	0.505446	0.462749	0.726646	0.518785	0.558663	0.411896	0.40413		0.240627	0.231384	0.251582	0.146044	0.251554	0.299934	0.276769	0.256482		0.309234	0.263171	0.285669	0.12731	0.229661	0.141403	0.311335	0.339388
296	0.450408	0.506932	0.463126	0.727647	0.519002	0.558603	0.411945	0.403343		0.240967	0.229276	0.250769	0.144678	0.251616	0.300174	0.277438	0.257304		0.308625	0.263792	0.286104	0.127675	0.229382	0.141223	0.310616	0.339354
297	0.450139	0.505113	0.463243	0.726828	0.517827	0.557435	0.412887	0.403468		0.241308	0.231805	0.251234	0.144746	0.253224	0.301791	0.277389	0.256721		0.308554	0.263082	0.285523	0.128426	0.22895	0.140774	0.309724	0.33981
298	0.450085	0.504492	0.463794	0.727033	0.518569	0.556627	0.412639	0.403103		0.242418	0.23165	0.250276	0.145293	0.250874	0.303048	0.277401	0.256219		0.307497	0.263858	0.28593	0.127675	0.230558	0.140325	0.309959	0.340678
299	0.450425	0.502984	0.464375	0.726509	0.518012	0.556956	0.413246	0.403194		0.242472	0.233047	0.249579	0.146954	0.253842	0.302779	0.276596	0.255888		0.307103	0.263969	0.286046	0.126536	0.228146	0.140265	0.310158	0.340918
300	0.449816	0.502074	0.464723	0.727101	0.515631	0.558603	0.413321	0.403251		0.243636	0.233757	0.249463	0.14659	0.255914	0.300773	0.27729	0.255637		0.306547	0.264169	0.285814	0.126309	0.228455	0.140624	0.30939	0.341112
301	0.449888	0.502629	0.463881	0.726395	0.515322	0.556956	0.413197	0.40356		0.243601	0.233092	0.250973	0.148024	0.257027	0.30215	0.27641	0.255386		0.306511	0.26428	0.285146	0.12558	0.227651	0.140894	0.310393	0.341055
302	0.449637	0.50325	0.465304	0.726532	0.515662	0.557495	0.413482	0.403856		0.243403	0.231605	0.24836	0.148639	0.254584	0.301252	0.277909	0.255374		0.306959	0.265145	0.286336	0.124829	0.229754	0.141253	0.308609	0.340769
303	0.449333	0.503915	0.464985	0.726418	0.514673	0.557495	0.413469	0.404222		0.243583	0.231095	0.250479	0.147683	0.256316	0.30194	0.278046	0.254838		0.307085	0.26499	0.284536	0.125899	0.229011	0.140564	0.308485	0.34094
304	0.44876	0.50447	0.46423	0.72635	0.515229	0.555908	0.413606	0.404165		0.244389	0.230363	0.251873	0.148753	0.255976	0.303528	0.277922	0.254564		0.306852	0.265167	0.283898	0.124898	0.228795	0.140564	0.308473	0.341272
305	0.448294	0.504692	0.465565	0.726145	0.514858	0.557615	0.413568	0.403742		0.243905	0.229831	0.250915	0.148502	0.254986	0.301491	0.2789	0.255283		0.307801	0.265478	0.28352	0.125353	0.230156	0.140894	0.307531	0.340975
306	0.448025	0.505002	0.466349	0.727579	0.514704	0.557675	0.41342	0.403982		0.244317	0.230097	0.250363	0.147091	0.254801	0.301222	0.278516	0.256208		0.307658	0.264901	0.283288	0.12533	0.230496	0.141103	0.308064	0.33981
307	0.44833	0.504714	0.466523	0.727875	0.5139	0.557555	0.412974	0.403925		0.243278	0.231184	0.250363	0.146567	0.254677	0.302479	0.27921	0.256059		0.308392	0.264102	0.283114	0.125558	0.231423	0.139965	0.307816	0.340016
308	0.447792	0.505446	0.465188	0.727465	0.514518	0.557256	0.412714	0.403811		0.244854	0.230474	0.251205	0.146613	0.252853	0.304007	0.279532	0.256699		0.307353	0.26408	0.283607	0.125922	0.232629	0.138737	0.307754	0.339491
309	0.44781	0.50427	0.46542	0.727465	0.515075	0.558364	0.413494	0.403662		0.243905	0.23196	0.25045	0.146977	0.252976	0.301312	0.27755	0.257486		0.308285	0.26377	0.28413	0.125558	0.231949	0.140325	0.308956	0.338851
310	0.447434	0.505157	0.464607	0.728148	0.514704	0.558484	0.412255	0.404096		0.243565	0.230563	0.251176	0.146545	0.252203	0.300563	0.27807	0.255546		0.309001	0.26428	0.284217	0.125307	0.233093	0.140953	0.309675	0.340358
311	0.448276	0.506266	0.463852	0.728444	0.514487	0.558004	0.411747	0.403297		0.243672	0.229587	0.251931	0.147136	0.251925	0.300653	0.277922	0.255214		0.308052	0.264147	0.284217	0.12442	0.233588	0.141343	0.310331	0.341488
312	0.449154	0.505335	0.46513	0.727989	0.514611	0.557525	0.412069	0.403354		0.243529	0.230141	0.251118	0.147228	0.251399	0.300982	0.277042	0.254004		0.307318	0.264524	0.283752	0.124784	0.23399	0.141492	0.310889	0.342642
313	0.450193	0.506511	0.465217	0.727238	0.516033	0.556956	0.411698	0.40308		0.241433	0.230962	0.251408	0.148161	0.249111	0.301641	0.277054	0.254906		0.308374	0.262527	0.283375	0.124602	0.234856	0.141403	0.311248	0.342014
314	0.450963	0.505912	0.465391	0.727169	0.514487	0.558004	0.412094	0.402498		0.241791	0.23247	0.252482	0.14873	0.251678	0.301312	0.277389	0.25526		0.307246	0.261618	0.282126	0.124101	0.233835	0.140684	0.310517	0.342242
315	0.450443	0.506156	0.464462	0.72726	0.51458	0.557885	0.412082	0.402726		0.24129	0.233668	0.254224	0.147523	0.252234	0.300264	0.277129	0.253867		0.308267	0.260176	0.281314	0.125216	0.233186	0.141852	0.31079	0.343406
316	0.450264	0.505357	0.464636	0.727511	0.513621	0.558004	0.411871	0.402247		0.241917	0.235864	0.253499	0.14675	0.25143	0.299934	0.277178	0.254735		0.307819	0.258779	0.281865	0.12574	0.234949	0.142061	0.310951	0.343018
317	0.450515	0.506089	0.46452	0.727374	0.514704	0.557615	0.411871	0.402966		0.24163	0.236375	0.253382	0.147364	0.252482	0.299605	0.277934	0.253856		0.307855	0.257536	0.282097	0.125262	0.232815	0.14278	0.310195	0.343178
318	0.451339	0.506178	0.464868	0.728307	0.513961	0.557435	0.411239	0.402909		0.241612	0.235931	0.254254	0.147956	0.25378	0.300713	0.278814	0.253799		0.307049	0.257891	0.280878	0.123737	0.232258	0.141852	0.309947	0.343292
319	0.45236	0.506377	0.464462	0.729127	0.513343	0.557555	0.411797	0.403171		0.240681	0.236707	0.254631	0.146249	0.256532	0.300952	0.278541	0.253696		0.306959	0.256915	0.280907	0.124624	0.230125	0.141492	0.309662	0.343132
320	0.452969	0.506422	0.464839	0.72981	0.512725	0.559681	0.411636	0.403343		0.239355	0.236419	0.253644	0.145042	0.257584	0.299725	0.279012	0.254495		0.307676	0.257159	0.281517	0.125148	0.229692	0.140594	0.309352	0.342162
321	0.451733	0.506821	0.464433	0.729582	0.512508	0.56055	0.412243	0.403845		0.241057	0.236175	0.252599	0.144724	0.257429	0.298946	0.279024	0.253605		0.30721	0.257004	0.282968	0.125694	0.230063	0.140504	0.308733	0.34255
322	0.452253	0.506311	0.465072	0.72965	0.512199	0.561059	0.411784	0.403057		0.240394	0.234755	0.251292	0.143768	0.257553	0.299275	0.279359	0.254141		0.307353	0.258934	0.283636	0.126582	0.230248	0.139666	0.308857	0.342801
323	0.452181	0.505912	0.464578	0.728785	0.512106	0.559502	0.41176	0.403286		0.242418	0.234733	0.251263	0.145338	0.258078	0.301671	0.279024	0.254552		0.305401	0.259355	0.284159	0.125876	0.229815	0.138827	0.309216	0.342162
324	0.451608	0.506377	0.464114	0.728216	0.511673	0.557615	0.412218	0.402646		0.243654	0.23338	0.253179	0.146158	0.259068	0.3023	0.278603	0.25494		0.304738	0.260243	0.282707	0.125626	0.229259	0.140085	0.309179	0.342413
325	0.452288	0.50691	0.463678	0.728011	0.510931	0.557615	0.412404	0.40292		0.242436	0.23358	0.253412	0.145179	0.261882	0.301581	0.278838	0.255214		0.305275	0.259511	0.28291	0.12681	0.227187	0.140804	0.308758	0.341865
326	0.452432	0.506755	0.463272	0.727989	0.510436	0.558274	0.41171	0.40203		0.242096	0.232382	0.253934	0.145657	0.26182	0.300683	0.279743	0.25494		0.305472	0.260864	0.282794	0.126354	0.227744	0.141043	0.308547	0.34303
327	0.453005	0.505645	0.462807	0.727898	0.511952	0.559532	0.41171	0.402053		0.240931	0.232626	0.255183	0.146272	0.260305	0.298826	0.279334	0.254735		0.306064	0.261729	0.28201	0.125831	0.227744	0.141642	0.308956	0.343212
328	0.452253	0.505091	0.462807	0.728307	0.511766	0.559023	0.411623	0.40187		0.242651	0.232226	0.256141	0.144974	0.260769	0.297718	0.278888	0.25405		0.305096	0.262683	0.281052	0.126719	0.227465	0.143259	0.309489	0.34408
329	0.452306	0.505446	0.46211	0.728376	0.512817	0.557495	0.411437	0.401916		0.242615	0.232604	0.255154	0.144997	0.261325	0.298227	0.278789	0.254016		0.305078	0.261951	0.282736	0.126628	0.225857	0.144277	0.309774	0.344069
330	0.451876	0.505778	0.462459	0.728763	0.513467	0.558064	0.411004	0.403034		0.243296	0.233025	0.255066	0.145953	0.257986	0.298257	0.279148	0.25397		0.304828	0.261197	0.282475	0.125285	0.228548	0.143679	0.309848	0.342995
331	0.452109	0.505424	0.462981	0.727943	0.513683	0.559831	0.41088	0.402669		0.243063	0.233047	0.255212	0.146886	0.257182	0.29658	0.278454	0.254221		0.304828	0.261529	0.281807	0.125171	0.229135	0.143589	0.310666	0.34311
332	0.451626	0.504581	0.462401	0.728854	0.513343	0.5604	0.410657	0.402064		0.243565	0.2348	0.255821	0.146727	0.258635	0.295891	0.27781	0.253924		0.30481	0.26062	0.281778	0.12442	0.228022	0.143708	0.311533	0.344012
333	0.451787	0.504603	0.462865	0.728194	0.51492	0.559292	0.411623	0.40235		0.242991	0.235421	0.255154	0.148252	0.257182	0.2967	0.275952	0.254621		0.305222	0.259976	0.281981	0.123555	0.227898	0.144008	0.312425	0.34303
334	0.453238	0.505202	0.462488	0.729059	0.516404	0.558903	0.411747	0.402692		0.240663	0.235687	0.255792	0.147592	0.255728	0.297598	0.275729	0.25518		0.306099	0.259111	0.28172	0.12335	0.227867	0.143499	0.312524	0.342128
335	0.453632	0.504802	0.463707	0.72808	0.517116	0.557915	0.411338	0.402863		0.239588	0.234888	0.251844	0.147979	0.255141	0.297389	0.275989	0.255591		0.30678	0.260309	0.284449	0.123942	0.227744	0.144697	0.312673	0.341546
336	0.452772	0.504802	0.46272	0.729377	0.518012	0.557106	0.411041	0.401973		0.24034	0.2344	0.250857	0.146067	0.254028	0.297898	0.27667	0.255854		0.306888	0.260797	0.286424	0.124556	0.22796	0.144996	0.312289	0.342173
337	0.452306	0.50529	0.463678	0.729764	0.516652	0.557406	0.410075	0.40147		0.240555	0.235598	0.251321	0.145839	0.253811	0.297898	0.277884	0.256607		0.307138	0.259111	0.285001	0.124397	0.229537	0.144697	0.312041	0.341922
338	0.452862	0.504292	0.462284	0.729673	0.515539	0.558573	0.410892	0.402167		0.240949	0.236375	0.253818	0.146317	0.254306	0.29646	0.277451	0.254027		0.306189	0.259333	0.283898	0.12401	0.230156	0.144966	0.311657	0.343806
339	0.453112	0.50427	0.462313	0.729582	0.515848	0.558573	0.409468	0.40195		0.241433	0.236641	0.253528	0.146863	0.252729	0.297059	0.278306	0.254872		0.305455	0.259089	0.284159	0.123555	0.231423	0.144367	0.312227	0.343178
340	0.453292	0.503472	0.462952	0.728785	0.516157	0.558693	0.408662	0.401607		0.241773	0.236996	0.253266	0.147364	0.252296	0.297988	0.278169	0.254598		0.304935	0.259533	0.283781	0.12385	0.231547	0.143319	0.313168	0.343795
341	0.453256	0.50376	0.464056	0.729446	0.516744	0.558334	0.408923	0.401676		0.241272	0.237018	0.252453	0.146681	0.252574	0.298856	0.277352	0.255603		0.305472	0.259222	0.283491	0.123873	0.230681	0.14281	0.313726	0.342721
342	0.453435	0.502562	0.464985	0.730015	0.51761	0.557585	0.408947	0.40187		0.242185	0.237595	0.250857	0.145452	0.252822	0.299156	0.276906	0.254963		0.30438	0.259843	0.284159	0.124533	0.229568	0.143259	0.314147	0.343167
343	0.452306	0.502562	0.463417	0.729992	0.516806	0.559412	0.408873	0.402578		0.243959	0.238304	0.251873	0.14552	0.254739	0.297239	0.276571	0.254769		0.303735	0.259134	0.284711	0.124488	0.228455	0.143349	0.314556	0.342653
344	0.451823	0.503738	0.462662	0.730083	0.5156	0.557316	0.408328	0.402909		0.243869	0.236996	0.252134	0.14502	0.255697	0.300623	0.277959	0.254963		0.304308	0.259267	0.285204	0.124898	0.228702	0.142061	0.313713	0.342128
345	0.452987	0.504026	0.46362	0.730697	0.513436	0.558154	0.408576	0.404016		0.242597	0.236441	0.250769	0.143472	0.257769	0.299814	0.278405	0.253696		0.304416	0.259533	0.285611	0.125831	0.228795	0.142032	0.31302	0.342288
346	0.452593	0.50407	0.462604	0.730652	0.513529	0.559053	0.409059	0.404347		0.243511	0.236863	0.25074	0.143494	0.255945	0.299814	0.277897	0.252771		0.303896	0.259067	0.286656	0.125854	0.230527	0.141133	0.313044	0.342881
347	0.451948	0.503516	0.462401	0.730675	0.513961	0.559412	0.409455	0.404119		0.242902	0.236308	0.250276	0.143312	0.254553	0.299635	0.27781	0.253765		0.30515	0.260176	0.287324	0.126013	0.231485	0.140953	0.312735	0.342116
348	0.451052	0.503538	0.460717	0.730515	0.514673	0.559681	0.410186	0.403697		0.243833	0.235265	0.25135	0.144223	0.255295	0.299036	0.277005	0.254472		0.305114	0.261197	0.287933	0.125262	0.230032	0.141283	0.312809	0.341831
349	0.450873	0.50396	0.461181	0.730584	0.514889	0.559741	0.409926	0.403525		0.24326	0.235665	0.250537	0.145839	0.255048	0.299695	0.276162	0.254952		0.305867	0.260376	0.288282	0.123577	0.230063	0.140564	0.313912	0.341523
350	0.450999	0.505512	0.461704	0.730788	0.515167	0.558514	0.409815	0.403537		0.243045	0.235509	0.250624	0.144792	0.255141	0.299874	0.277129	0.254176		0.305956	0.258978	0.287672	0.12442	0.229692	0.141612	0.313057	0.342288
351	0.451697	0.504359	0.461646	0.730288	0.514611	0.558334	0.411091	0.403308		0.241917	0.235509	0.250305	0.145429	0.254924	0.299964	0.276819	0.254313		0.306386	0.260132	0.288049	0.124283	0.230465	0.141702	0.31209	0.342379
352	0.451769	0.503849	0.461733	0.730629	0.514549	0.558004	0.410917	0.403662		0.242114	0.235931	0.249231	0.145862	0.255728	0.300563	0.278095	0.254975		0.306117	0.26022	0.289037	0.123509	0.229723	0.141433	0.310988	0.341363
353	0.450694	0.503937	0.460513	0.73006	0.514456	0.559681	0.410087	0.403891		0.244819	0.234156	0.250334	0.147182	0.255667	0.299485	0.278293	0.254701		0.304487	0.261906	0.289153	0.122758	0.229877	0.140834	0.31162	0.341409
354	0.450408	0.503139	0.460542	0.729787	0.514858	0.559382	0.410124	0.404062		0.24421	0.233402	0.251321	0.147569	0.254986	0.300293	0.277253	0.254541		0.305383	0.263459	0.288137	0.122644	0.230156	0.140325	0.312623	0.341397
355	0.450658	0.504048	0.461733	0.728922	0.515044	0.559382	0.410446	0.404359		0.242812	0.232071	0.25106	0.147979	0.254893	0.300323	0.277377	0.254655		0.306529	0.263881	0.287207	0.123099	0.230063	0.140295	0.312177	0.340986
356	0.450443	0.505113	0.461239	0.727966	0.516373	0.559562	0.41093	0.404484		0.241523	0.23114	0.251815	0.148388	0.254244	0.298077	0.276546	0.254883		0.308034	0.263747	0.286946	0.123646	0.229382	0.142361	0.312524	0.340632
357	0.450228	0.505934	0.460688	0.728307	0.516837	0.558993	0.410372	0.403834		0.240931	0.230807	0.25286	0.147455	0.255017	0.299934	0.277761	0.254324		0.30884	0.263259	0.286453	0.124237	0.228146	0.141073	0.311867	0.341842
358	0.449566	0.505069	0.460513	0.727898	0.518198	0.559442	0.410508	0.403571		0.241397	0.231761	0.254544	0.147159	0.253811	0.298706	0.278194	0.254724		0.309037	0.263171	0.284943	0.124943	0.227991	0.141852	0.311297	0.341705
359	0.448688	0.504825	0.460542	0.729241	0.518105	0.560161	0.41176	0.40477		0.243045	0.232581	0.253557	0.146112	0.253842	0.298287	0.277079	0.253902		0.308267	0.262594	0.285901	0.124647	0.228053	0.141552	0.311161	0.341329
360	0.448312	0.504181	0.458975	0.729286	0.517579	0.559621	0.411437	0.404028		0.242006	0.233846	0.254399	0.145839	0.255543	0.298467	0.2776	0.253753		0.309682	0.261973	0.286627	0.124875	0.226878	0.141912	0.310963	0.342219
361	0.44824	0.503316	0.459526	0.729605	0.51761	0.560071	0.412119	0.404267		0.241791	0.233402	0.255763	0.146044	0.252976	0.299096	0.278169	0.25365		0.309969	0.263282	0.284711	0.124351	0.229413	0.140834	0.309712	0.342082
362	0.448204	0.50285	0.459991	0.729719	0.517641	0.560071	0.412082	0.404621		0.243439	0.23318	0.254515	0.146476	0.253347	0.298706	0.277364	0.253981		0.308356	0.263969	0.285494	0.123805	0.229011	0.141223	0.310554	0.341397
363	0.448079	0.501409	0.458713	0.730219	0.517765	0.558304	0.412441	0.404701		0.243278	0.235221	0.254602	0.145953	0.253193	0.301192	0.277736	0.25429		0.308643	0.26337	0.286685	0.123828	0.229042	0.140504	0.309823	0.341009
364	0.448437	0.500477	0.457145	0.730902	0.518105	0.559322	0.412726	0.40501		0.242436	0.234866	0.257215	0.145361	0.251832	0.300413	0.277538	0.253376		0.309127	0.264657	0.28564	0.123737	0.230063	0.140265	0.309736	0.341614
365	0.448383	0.500965	0.459207	0.731631	0.516806	0.558963	0.412528	0.405249		0.242365	0.233646	0.255241	0.144792	0.254801	0.300743	0.278207	0.251801		0.309252	0.265389	0.285553	0.123577	0.228393	0.140295	0.309266	0.34295
366	0.44867	0.500699	0.45822	0.730697	0.517332	0.557645	0.411698	0.405135		0.241845	0.232692	0.256054	0.145543	0.253657	0.301252	0.279445	0.251207		0.309485	0.266609	0.285727	0.123759	0.229011	0.141103	0.308857	0.343658
367	0.449225	0.501342	0.458278	0.73138	0.516961	0.558334	0.411896	0.404827		0.240537	0.231982	0.25527	0.145202	0.254893	0.299994	0.279012	0.252075		0.310237	0.266676	0.286453	0.123418	0.228146	0.141672	0.309092	0.343098
368	0.447685	0.500898	0.457668	0.731426	0.517023	0.556956	0.41176	0.403982		0.241935	0.232116	0.256605	0.145042	0.255172	0.300174	0.279148	0.253411		0.310381	0.266986	0.285727	0.123532	0.227805	0.14287	0.309092	0.342607
369	0.448007	0.501431	0.459033	0.73138	0.517889	0.557795	0.411784	0.403765		0.241863	0.232737	0.254718	0.144451	0.254924	0.299754	0.278492	0.254872		0.31013	0.265833	0.286249	0.124169	0.227187	0.142451	0.309724	0.341363
370	0.448294	0.501187	0.460223	0.730743	0.517827	0.558514	0.411586	0.404051		0.24034	0.234045	0.253034	0.144405	0.25477	0.298946	0.277364	0.254998		0.311366	0.264768	0.286743	0.124852	0.227403	0.142541	0.31105	0.340952
371	0.448831	0.501675	0.462255	0.73088	0.519249	0.558454	0.411376	0.403651		0.241093	0.231628	0.251669	0.144428	0.252141	0.297748	0.277377	0.255203		0.310076	0.266698	0.286075	0.124693	0.228609	0.143798	0.311248	0.341146
372	0.448491	0.500787	0.460833	0.730015	0.518724	0.557166	0.411908	0.403674		0.241684	0.231694	0.254079	0.146067	0.254059	0.301821	0.277302	0.25534		0.309825	0.267518	0.285088	0.123919	0.227218	0.141013	0.31079	0.340986
373	0.44901	0.501209	0.459991	0.730515	0.51928	0.556867	0.412032	0.403754		0.242114	0.231583	0.253789	0.14593	0.252172	0.301461	0.277129	0.25518		0.308876	0.267208	0.28622	0.123555	0.228548	0.141672	0.310839	0.341066
374	0.449315	0.501386	0.461036	0.730766	0.519218	0.554621	0.411995	0.40413		0.241397	0.229587	0.252337	0.145088	0.252853	0.304126	0.277562	0.255511		0.309288	0.269027	0.286627	0.124146	0.227929	0.141253	0.310443	0.340358
375	0.450372	0.50132	0.459323	0.730083	0.517548	0.555938	0.410484	0.40453		0.241093	0.229764	0.254428	0.146112	0.254337	0.302929	0.280028	0.254883		0.308536	0.268916	0.286249	0.123805	0.228115	0.141133	0.309489	0.340587
376	0.450533	0.500921	0.4588	0.730925	0.518198	0.555998	0.410645	0.40453		0.241272	0.229587	0.256576	0.145589	0.251987	0.302899	0.28035	0.254986		0.308195	0.269493	0.284623	0.123486	0.229815	0.141103	0.309006	0.340484
377	0.450228	0.499612	0.458626	0.730857	0.517363	0.555998	0.411289	0.405089		0.240573	0.232071	0.255705	0.145885	0.252234	0.30239	0.280325	0.254552		0.309198	0.268317	0.285669	0.123259	0.230403	0.141612	0.308386	0.340358
378	0.449745	0.499967	0.458597	0.730925	0.516961	0.55495	0.411029	0.404587		0.239982	0.230895	0.254166	0.144997	0.251523	0.303348	0.279768	0.25542		0.310273	0.269138	0.287237	0.124078	0.231516	0.141702	0.309204	0.339993
379	0.449207	0.499767	0.458452	0.731107	0.516992	0.553483	0.410645	0.404747		0.240573	0.231428	0.254776	0.144837	0.250502	0.304186	0.280164	0.255351		0.310219	0.268805	0.286772	0.124055	0.232506	0.142331	0.309191	0.339902
380	0.44815	0.500255	0.458597	0.730766	0.515817	0.554351	0.410062	0.405329		0.241129	0.231561	0.255996	0.143586	0.253409	0.301881	0.281019	0.25429		0.310721	0.268184	0.285407	0.125649	0.230774	0.143768	0.308919	0.340381
381	0.448276	0.500921	0.458162	0.73113	0.515384	0.555788	0.410942	0.405363		0.241648	0.231805	0.256112	0.143108	0.254615	0.301881	0.279235	0.254689		0.310076	0.267274	0.285727	0.125763	0.230001	0.142331	0.309823	0.339947
382	0.447577	0.501253	0.457639	0.729286	0.513869	0.555459	0.410818	0.405866		0.242812	0.231938	0.254573	0.144633	0.25579	0.30206	0.279607	0.254392		0.30961	0.266809	0.287788	0.126081	0.230341	0.142481	0.309575	0.339742
383	0.448348	0.502362	0.458074	0.729946	0.513219	0.555669	0.411264	0.406585		0.242723	0.231051	0.254166	0.142675	0.256996	0.302479	0.279297	0.253205		0.30893	0.266587	0.287759	0.127379	0.229784	0.141852	0.309439	0.34021
384	0.447864	0.501852	0.458481	0.729969	0.513065	0.555429	0.411388	0.406448		0.242454	0.23196	0.253557	0.143426	0.256934	0.302689	0.280276	0.253685		0.309682	0.266188	0.287962	0.126605	0.230001	0.141882	0.308337	0.339867
385	0.447237	0.501874	0.458539	0.73006	0.512972	0.556417	0.411896	0.406505		0.24335	0.232382	0.255879	0.14329	0.255852	0.301881	0.278194	0.253262		0.309413	0.265744	0.285582	0.12665	0.231176	0.141702	0.30991	0.340233
386	0.447058	0.500965	0.458597	0.729832	0.512879	0.55522	0.411549	0.405695		0.244245	0.234156	0.254254	0.143153	0.25678	0.301821	0.279074	0.252554		0.308697	0.264879	0.287149	0.127014	0.230341	0.14296	0.309377	0.341751
387	0.44738	0.502096	0.458597	0.729286	0.514611	0.554321	0.411103	0.406836		0.244317	0.233247	0.254224	0.144405	0.254863	0.303468	0.278851	0.25308		0.308303	0.264657	0.287178	0.126309	0.230527	0.142211	0.310046	0.340084
388	0.448222	0.502828	0.457465	0.730197	0.514363	0.555519	0.411041	0.406619		0.243672	0.233646	0.255444	0.14461	0.254522	0.30224	0.277798	0.25308		0.308106	0.263526	0.287091	0.125193	0.231114	0.142241	0.311161	0.340301
389	0.448294	0.502429	0.45581	0.730811	0.514209	0.556357	0.411165	0.406357		0.244854	0.234112	0.256315	0.14461	0.253811	0.301791	0.277612	0.254587		0.306852	0.263459	0.287875	0.124579	0.23198	0.141852	0.311223	0.339057
390	0.4491	0.501209	0.456129	0.731858	0.514178	0.558274	0.411549	0.4063		0.243959	0.236352	0.256286	0.142356	0.255234	0.300024	0.278021	0.255146		0.306941	0.262439	0.287585	0.125785	0.230588	0.141702	0.31043	0.338554
391	0.449225	0.50132	0.45671	0.731403	0.513219	0.557765	0.411747	0.405375		0.243744	0.235399	0.256025	0.142789	0.255728	0.300353	0.278046	0.255568		0.307031	0.263282	0.287266	0.125808	0.231052	0.141882	0.310207	0.339057
392	0.448974	0.501542	0.456768	0.732131	0.513374	0.557406	0.412045	0.404576		0.244783	0.234201	0.256257	0.14222	0.254708	0.300533	0.278417	0.255591		0.306243	0.264258	0.286975	0.125649	0.231918	0.142061	0.309538	0.339833
393	0.44944	0.499323	0.45732	0.732382	0.512817	0.557346	0.41223	0.403959		0.243726	0.237062	0.255008	0.142015	0.25644	0.301192	0.278132	0.255979		0.306834	0.263614	0.287672	0.125603	0.230743	0.141463	0.309637	0.340061
394	0.449834	0.499168	0.458423	0.732632	0.514209	0.558663	0.411512	0.404222		0.242956	0.236419	0.255037	0.142766	0.254059	0.300803	0.277723	0.255922		0.30721	0.264413	0.28654	0.124602	0.231733	0.140534	0.310765	0.339856
395	0.450049	0.498458	0.458423	0.732769	0.51424	0.559023	0.4114	0.404051		0.242508	0.236574	0.257128	0.142038	0.25378	0.300952	0.278244	0.256402		0.307443	0.264968	0.284449	0.125193	0.23198	0.140025	0.310356	0.339548
396	0.44987	0.498436	0.459323	0.73204	0.514611	0.559023	0.411772	0.40332		0.241738	0.237018	0.25646	0.143085	0.253904	0.301641	0.278046	0.255979		0.308392	0.264546	0.284217	0.124875	0.231485	0.139336	0.310182	0.340701
397	0.449888	0.498503	0.459352	0.731244	0.514735	0.559592	0.412614	0.40292		0.242902	0.236996	0.256083	0.144542	0.253316	0.300803	0.276088	0.256767		0.30721	0.264502	0.284565	0.124215	0.231949	0.139606	0.311297	0.340313
398	0.450103	0.500233	0.458916	0.731335	0.513498	0.559292	0.412577	0.403719		0.241254	0.236042	0.255996	0.144359	0.254522	0.301312	0.277166	0.256596		0.308643	0.263725	0.285088	0.124306	0.23198	0.139396	0.310257	0.339685
399	0.450228	0.501386	0.459439	0.731858	0.512601	0.559532	0.411933	0.4034		0.240448	0.236308	0.255705	0.143881	0.256625	0.30233	0.279309	0.256162		0.309324	0.262306	0.284856	0.12426	0.230774	0.138139	0.308758	0.340438
400	0.450193	0.500322	0.459729	0.731198	0.512848	0.558783	0.411276	0.403685		0.239713	0.237018	0.253324	0.145088	0.257862	0.302869	0.279099	0.256699		0.310094	0.262661	0.286946	0.123714	0.22929	0.138348	0.309625	0.339616
401	0.451088	0.499701	0.45941	0.731244	0.512725	0.558394	0.41145	0.404633		0.239248	0.236574	0.253266	0.14527	0.257769	0.303078	0.278454	0.256128		0.309664	0.263725	0.287324	0.123486	0.229506	0.138528	0.310096	0.339239
402	0.451876	0.49919	0.4588	0.730356	0.513188	0.557376	0.410632	0.404724		0.23914	0.235487	0.251902	0.145702	0.256965	0.303378	0.277463	0.255991		0.308983	0.265322	0.289298	0.123942	0.229846	0.139247	0.311905	0.339285
403	0.451805	0.498237	0.458452	0.731267	0.51223	0.557825	0.410137	0.404907		0.239427	0.236685	0.252773	0.144997	0.257182	0.30206	0.277637	0.256676		0.308768	0.265078	0.288775	0.123737	0.230588	0.140115	0.312227	0.338417
404	0.451357	0.498436	0.460049	0.731836	0.512106	0.558394	0.410843	0.405181		0.239767	0.237107	0.251553	0.145953	0.257862	0.300323	0.2762	0.256733		0.308876	0.264457	0.288398	0.122212	0.230032	0.141283	0.312958	0.338086
405	0.451984	0.498658	0.460746	0.731858	0.511178	0.558034	0.410248	0.4055		0.238119	0.23704	0.251292	0.145885	0.258511	0.300264	0.277253	0.255728		0.309897	0.264302	0.287962	0.122257	0.23031	0.141702	0.312499	0.338771
406	0.451178	0.497859	0.460078	0.732177	0.512415	0.557705	0.409901	0.405637		0.240824	0.238504	0.251728	0.145543	0.257646	0.300832	0.278355	0.255351		0.307998	0.263637	0.288195	0.12228	0.229939	0.141463	0.311743	0.339011
407	0.451626	0.496883	0.459991	0.733179	0.513096	0.558064	0.410521	0.405558		0.240161	0.239192	0.253005	0.144906	0.257738	0.30218	0.277525	0.255294		0.308213	0.263925	0.287004	0.121916	0.229166	0.139756	0.311954	0.339148
408	0.451912	0.498059	0.461559	0.733201	0.513374	0.558993	0.410719	0.405809		0.239928	0.237395	0.252773	0.144496	0.259346	0.300892	0.277934	0.254918		0.308159	0.264546	0.285669	0.122303	0.22728	0.140115	0.311347	0.339274
409	0.451518	0.498547	0.461268	0.733224	0.514147	0.558723	0.410954	0.405717		0.240269	0.236197	0.25376	0.14379	0.258635	0.299784	0.278938	0.254644		0.308213	0.265256	0.284972	0.122986	0.227218	0.141492	0.310108	0.339639
410	0.451554	0.498281	0.460136	0.733406	0.513405	0.558424	0.410211	0.406585		0.239409	0.236907	0.254776	0.142834	0.258666	0.298377	0.279507	0.254324		0.309037	0.264812	0.285088	0.123759	0.227929	0.143199	0.310282	0.339091
411	0.452521	0.498747	0.458597	0.733497	0.513312	0.559532	0.410694	0.406151		0.237922	0.235288	0.255734	0.142083	0.257398	0.297179	0.2789	0.254427		0.309557	0.265966	0.285669	0.12442	0.22929	0.143289	0.310405	0.339422
412	0.452969	0.497305	0.460049	0.732678	0.512972	0.559082	0.411301	0.406128		0.238047	0.236996	0.254718	0.143699	0.256099	0.298347	0.278492	0.254735		0.308983	0.2657	0.285233	0.123623	0.230929	0.142571	0.310207	0.339137
413	0.453327	0.495686	0.460658	0.734021	0.514611	0.559053	0.411425	0.406128		0.238692	0.239902	0.252889	0.143267	0.25378	0.297538	0.278046	0.254221		0.30798	0.264413	0.286453	0.122712	0.231609	0.143409	0.310529	0.33965
414	0.453184	0.497571	0.462052	0.732382	0.514394	0.558723	0.411797	0.405603		0.239982	0.237816	0.253876	0.144268	0.253997	0.298617	0.277154	0.255785		0.306834	0.264613	0.284072	0.12335	0.231609	0.14266	0.31105	0.338612
415	0.453041	0.497704	0.46211	0.732473	0.515013	0.557346	0.411896	0.405375		0.241146	0.238105	0.255183	0.143472	0.253131	0.300503	0.276708	0.255317		0.305813	0.264191	0.282707	0.124055	0.231856	0.142151	0.311397	0.339308
416	0.453829	0.499523	0.462952	0.732632	0.515106	0.557585	0.412206	0.404153		0.238836	0.236153	0.255938	0.142675	0.252574	0.301102	0.275865	0.256596		0.307335	0.264324	0.28111	0.124693	0.23232	0.141313	0.311929	0.339251
417	0.453399	0.498791	0.462546	0.732792	0.515384	0.558394	0.412528	0.404793		0.239516	0.235509	0.254283	0.143016	0.25242	0.299814	0.276435	0.255146		0.307085	0.2657	0.283172	0.124192	0.232196	0.141792	0.311037	0.340061
418	0.45279	0.498569	0.463707	0.732883	0.515229	0.558993	0.411363	0.405112		0.241845	0.235665	0.254892	0.141901	0.25177	0.299006	0.277438	0.25502		0.305365	0.265766	0.281401	0.125216	0.233	0.142002	0.311198	0.339867
419	0.452808	0.499102	0.463155	0.733156	0.512415	0.559741	0.411177	0.405866		0.242042	0.2346	0.256373	0.141856	0.25477	0.296251	0.277364	0.253331		0.30515	0.266298	0.280472	0.124989	0.232815	0.144008	0.311459	0.340803
420	0.4527	0.49868	0.46243	0.733224	0.512941	0.56028	0.412119	0.406425		0.242257	0.2348	0.256083	0.143221	0.253069	0.297059	0.275729	0.253376		0.305043	0.26652	0.281488	0.123555	0.23399	0.14266	0.312152	0.340198
421	0.452593	0.499079	0.462923	0.73327	0.513436	0.559352	0.411078	0.406676		0.241343	0.233557	0.254747	0.143085	0.253162	0.297239	0.277773	0.253993		0.306064	0.267363	0.28233	0.123646	0.233402	0.143409	0.311149	0.339331
422	0.452933	0.499124	0.464085	0.732746	0.514858	0.558843	0.411016	0.406174		0.241594	0.233646	0.252366	0.14313	0.253286	0.296221	0.277513	0.254335		0.305472	0.26723	0.283549	0.124124	0.231856	0.144936	0.311471	0.339491
423	0.452593	0.498569	0.462778	0.731676	0.514333	0.558633	0.411846	0.406848		0.242257	0.233225	0.254602	0.144086	0.254553	0.297748	0.2762	0.253719		0.30515	0.268206	0.28262	0.124237	0.231114	0.143619	0.311954	0.339434
424	0.453381	0.499213	0.464085	0.731198	0.513714	0.560101	0.411648	0.406825		0.240931	0.232448	0.25347	0.145885	0.256007	0.296341	0.275766	0.254632		0.305687	0.268339	0.282446	0.122917	0.230279	0.143559	0.312586	0.338543
425	0.452808	0.500876	0.464056	0.731449	0.51291	0.560819	0.412404	0.406893		0.241899	0.23043	0.253034	0.145429	0.256811	0.294035	0.275407	0.25518		0.305293	0.268694	0.28291	0.123122	0.230279	0.145146	0.31219	0.337927
426	0.453238	0.499412	0.463765	0.730083	0.513096	0.560849	0.412491	0.406619		0.240537	0.233202	0.254573	0.145771	0.255945	0.293885	0.275295	0.255112		0.306225	0.267385	0.281662	0.124146	0.23096	0.145266	0.312214	0.338269
427	0.453524	0.499035	0.463243	0.730083	0.513745	0.562376	0.412478	0.40687		0.240591	0.233092	0.254689	0.14791	0.254461	0.293975	0.275667	0.255237		0.305884	0.267873	0.282068	0.122007	0.231794	0.143649	0.311855	0.337892
428	0.455029	0.499922	0.462168	0.730106	0.514333	0.561778	0.412354	0.407087		0.239069	0.232848	0.253557	0.148024	0.252853	0.294424	0.277327	0.254552		0.305902	0.26723	0.284275	0.12187	0.232815	0.143798	0.310319	0.33836
429	0.454796	0.499678	0.461646	0.73113	0.515384	0.560939	0.411698	0.406916		0.238316	0.233535	0.25376	0.146795	0.2531	0.295143	0.278553	0.255591		0.306888	0.266786	0.284594	0.122075	0.231516	0.143918	0.309749	0.337493
430	0.453471	0.501342	0.4615	0.730766	0.516528	0.559442	0.411698	0.406836		0.238692	0.233025	0.252976	0.146818	0.252667	0.29673	0.278058	0.255625		0.307837	0.265633	0.285523	0.122416	0.230805	0.143828	0.310244	0.337538
431	0.453381	0.500987	0.461878	0.730788	0.516281	0.559292	0.41083	0.40767		0.24009	0.233735	0.251873	0.147228	0.253533	0.294903	0.279272	0.255226		0.306529	0.265278	0.286249	0.121984	0.230186	0.145805	0.309898	0.337105
432	0.453399	0.501364	0.462139	0.729673	0.515508	0.559142	0.410273	0.408172		0.240018	0.233979	0.253063	0.147637	0.254553	0.295921	0.280053	0.253685		0.306583	0.264657	0.284798	0.12269	0.229939	0.144936	0.309675	0.338143
433	0.452378	0.501165	0.46182	0.729605	0.515446	0.558963	0.410768	0.407418		0.241863	0.234045	0.252424	0.146385	0.253749	0.29658	0.279359	0.253536		0.305759	0.26479	0.285756	0.12401	0.230805	0.144457	0.309873	0.339045
434	0.45227	0.500455	0.462081	0.729764	0.515415	0.558184	0.409963	0.407304		0.241182	0.235421	0.250915	0.145224	0.253626	0.297748	0.27947	0.254004		0.306547	0.264125	0.287004	0.125011	0.23096	0.144068	0.310567	0.338691
435	0.453041	0.50061	0.460397	0.729172	0.515693	0.558723	0.409963	0.406825		0.240287	0.235953	0.253789	0.146363	0.252636	0.297149	0.279792	0.254758		0.306673	0.263437	0.285814	0.124465	0.231671	0.144128	0.310244	0.338417
436	0.454671	0.50112	0.459265	0.729491	0.51458	0.556777	0.410459	0.407007		0.238603	0.235044	0.254399	0.146567	0.255759	0.299784	0.279396	0.254564		0.306726	0.263836	0.286336	0.123942	0.229661	0.143439	0.310145	0.338429
437	0.453632	0.501253	0.459642	0.729514	0.514302	0.555938	0.409976	0.407099		0.239104	0.234156	0.254224	0.146932	0.255759	0.301611	0.278628	0.254176		0.307264	0.26459	0.286133	0.123555	0.229939	0.142451	0.311397	0.338726
438	0.453489	0.501675	0.459381	0.729719	0.514673	0.556447	0.409715	0.406653		0.23966	0.233247	0.255183	0.147319	0.254059	0.300593	0.280152	0.254929		0.306852	0.265078	0.285436	0.122963	0.231269	0.14296	0.310133	0.338417
439	0.453184	0.500632	0.460688	0.729195	0.516621	0.555938	0.409381	0.405329		0.238621	0.234378	0.25437	0.147592	0.251925	0.30197	0.280783	0.254918		0.308195	0.26499	0.284943	0.123213	0.231454	0.142091	0.309836	0.339753
440	0.454026	0.501165	0.460775	0.729719	0.516404	0.555848	0.409455	0.405386		0.238764	0.23369	0.256228	0.146203	0.251801	0.303228	0.280672	0.254153		0.30721	0.265145	0.282998	0.124078	0.231794	0.140924	0.309873	0.340461
441	0.454098	0.50285	0.462401	0.728854	0.517765	0.555399	0.409604	0.405603		0.238137	0.232093	0.253847	0.146909	0.25075	0.302899	0.280672	0.254849		0.307765	0.265056	0.283752	0.124237	0.231485	0.141702	0.309724	0.339548
442	0.452736	0.502784	0.462139	0.727943	0.518476	0.555759	0.410273	0.406539		0.239516	0.233092	0.25376	0.148093	0.251585	0.303288	0.28066	0.253205		0.307747	0.264125	0.284101	0.123964	0.229939	0.140953	0.309067	0.340255
443	0.452056	0.503383	0.461675	0.728421	0.517796	0.556387	0.409976	0.406836		0.239606	0.233025	0.255037	0.147774	0.252667	0.30239	0.280276	0.253194		0.308339	0.263592	0.283288	0.123805	0.229537	0.141223	0.309749	0.33997
444	0.451948	0.503649	0.461878	0.729354	0.51761	0.557406	0.409678	0.406037		0.239409	0.232648	0.254979	0.147114	0.252451	0.300773	0.279978	0.254575		0.308643	0.263703	0.283143	0.123532	0.229939	0.141822	0.310344	0.339388
445	0.452396	0.504514	0.461442	0.729036	0.518631	0.557406	0.409369	0.406437		0.238227	0.231628	0.253876	0.146067	0.251368	0.300862	0.279854	0.254027		0.309378	0.263858	0.284681	0.124898	0.230001	0.141732	0.310777	0.339536
446	0.453381	0.505157	0.462023	0.72899	0.518754	0.555339	0.409393	0.406197		0.236919	0.230829	0.253615	0.146067	0.251121	0.303019	0.279879	0.253822		0.3097	0.264014	0.284362	0.124943	0.230125	0.141642	0.310728	0.339982
447	0.45322	0.505313	0.462546	0.728876	0.518476	0.554082	0.408848	0.405843		0.236811	0.231494	0.253441	0.146158	0.252605	0.304246	0.280189	0.253319		0.309969	0.263193	0.284014	0.124966	0.228919	0.141672	0.310963	0.340838
448	0.45236	0.504758	0.462952	0.728421	0.518538	0.554621	0.407845	0.40614		0.238621	0.233136	0.251931	0.147	0.25109	0.304216	0.281428	0.252532		0.309019	0.262106	0.285117	0.124579	0.230372	0.141163	0.310728	0.341329
449	0.451948	0.504692	0.462168	0.727693	0.517796	0.55513	0.408823	0.406551		0.239176	0.233868	0.252511	0.147683	0.25242	0.303977	0.279805	0.252828		0.308876	0.261441	0.28532	0.124624	0.229784	0.140894	0.311372	0.340621
450	0.451769	0.504314	0.463417	0.728398	0.518322	0.55498	0.407808	0.4063		0.239803	0.235975	0.250508	0.147296	0.252203	0.303408	0.280449	0.252817		0.308428	0.25971	0.286075	0.124306	0.229475	0.141612	0.311743	0.340883
451	0.452414	0.503538	0.462633	0.727943	0.517548	0.55519	0.407857	0.406733		0.239409	0.2346	0.250973	0.147228	0.254739	0.302899	0.280065	0.252041		0.308177	0.261862	0.286395	0.124829	0.227713	0.141912	0.312078	0.341226
452	0.452915	0.502496	0.462168	0.727807	0.51826	0.556657	0.409653	0.406048		0.240609	0.235798	0.250131	0.146294	0.255728	0.30197	0.279458	0.252954		0.306476	0.261707	0.287701	0.125899	0.226012	0.141373	0.310889	0.340998
453	0.453399	0.502252	0.463214	0.727943	0.518569	0.555759	0.40948	0.406322		0.239212	0.236131	0.249463	0.145976	0.253811	0.30206	0.279966	0.25268		0.307389	0.261618	0.287324	0.126081	0.22762	0.142181	0.310554	0.340998
454	0.453184	0.502007	0.461994	0.728194	0.519713	0.557376	0.409666	0.405946		0.239122	0.235576	0.251611	0.145065	0.251708	0.300653	0.27973	0.252771		0.307694	0.262417	0.286395	0.126741	0.228578	0.141972	0.310604	0.341283
455	0.451697	0.501364	0.46153	0.728444	0.519064	0.557795	0.409753	0.406014		0.24086	0.234999	0.253702	0.145429	0.250874	0.301102	0.279582	0.254666		0.307443	0.263637	0.284769	0.126127	0.230063	0.141103	0.310666	0.339319
456	0.451769	0.501741	0.460891	0.729081	0.517796	0.555908	0.40943	0.405763		0.241343	0.234999	0.255908	0.144223	0.252141	0.30236	0.279185	0.255032		0.306888	0.263259	0.283201	0.126696	0.230063	0.141732	0.311384	0.339205
457	0.451894	0.501586	0.459468	0.728672	0.517579	0.55501	0.409938	0.406026		0.240609	0.236175	0.257012	0.144064	0.252172	0.304037	0.279111	0.254392		0.307497	0.262239	0.28352	0.127265	0.230248	0.140953	0.310951	0.339582
458	0.451787	0.501054	0.459294	0.728694	0.517889	0.555669	0.409715	0.406106		0.240824	0.235532	0.259073	0.144246	0.250595	0.304126	0.279891	0.254541		0.307389	0.263415	0.281633	0.12706	0.231516	0.140205	0.310393	0.339354
459	0.452127	0.501475	0.460455	0.728581	0.517085	0.557555	0.410372	0.405752		0.241827	0.234733	0.257563	0.144792	0.251678	0.302959	0.27833	0.254427		0.306046	0.263792	0.281981	0.126628	0.231238	0.139486	0.311297	0.339822
460	0.451876	0.501298	0.461442	0.729241	0.51693	0.556597	0.411264	0.406197		0.241379	0.234644	0.255647	0.145042	0.253007	0.303228	0.27667	0.254176		0.306744	0.264058	0.28291	0.125717	0.230063	0.140175	0.312066	0.339628
461	0.451787	0.502096	0.462081	0.729946	0.516188	0.557016	0.411016	0.406094		0.241415	0.233846	0.254312	0.144223	0.253409	0.302599	0.276732	0.254255		0.306798	0.264058	0.283607	0.125831	0.230403	0.140385	0.312251	0.33965
462	0.451482	0.502518	0.461471	0.730083	0.517641	0.556926	0.410967	0.405946		0.241809	0.234134	0.256373	0.143631	0.252512	0.301911	0.277364	0.254655		0.306708	0.263348	0.282156	0.126286	0.229846	0.141163	0.311669	0.339399
463	0.450837	0.503893	0.461268	0.729514	0.517208	0.556747	0.411091	0.406608		0.242741	0.233247	0.25768	0.143904	0.253316	0.301761	0.277562	0.254883		0.306422	0.26286	0.281052	0.126582	0.229475	0.141492	0.311347	0.338509
464	0.45116	0.502629	0.460397	0.729286	0.518476	0.557585	0.410645	0.406642		0.242329	0.236485	0.258957	0.144724	0.251739	0.301282	0.277686	0.254712		0.306511	0.260886	0.280646	0.12599	0.229784	0.141133	0.311669	0.338646
465	0.451948	0.503139	0.460978	0.729946	0.519651	0.558783	0.411537	0.405569		0.240107	0.236973	0.256286	0.14379	0.250533	0.301731	0.278417	0.255797		0.307944	0.259888	0.282736	0.126263	0.229815	0.139486	0.310046	0.338634
466	0.451232	0.503272	0.462081	0.729446	0.519342	0.558903	0.411078	0.405809		0.241953	0.237373	0.255183	0.14502	0.250193	0.302599	0.279408	0.254883		0.306816	0.259355	0.282736	0.125535	0.230465	0.138498	0.309513	0.339308
467	0.451321	0.50254	0.463097	0.729127	0.51928	0.558603	0.410967	0.405295		0.241773	0.236619	0.253034	0.144837	0.248616	0.30212	0.279891	0.25574		0.306906	0.260842	0.283869	0.126036	0.232104	0.139277	0.309142	0.338965
468	0.450372	0.502274	0.463678	0.729081	0.518445	0.559112	0.411314	0.405329		0.243618	0.237639	0.254283	0.145429	0.2501	0.301252	0.278789	0.256162		0.30601	0.260087	0.282039	0.125489	0.231454	0.139636	0.309898	0.338509
469	0.450175	0.502052	0.464026	0.728694	0.51826	0.558484	0.410471	0.404815		0.243475	0.23806	0.25556	0.145543	0.249915	0.302629	0.27973	0.255797		0.30635	0.259888	0.280413	0.125763	0.231825	0.138887	0.309798	0.339388
470	0.450193	0.502074	0.463852	0.729605	0.517425	0.559082	0.409703	0.405169		0.242759	0.237417	0.254428	0.145202	0.251801	0.301761	0.280412	0.253548		0.307049	0.260509	0.28172	0.125193	0.230774	0.139157	0.309885	0.341283
471	0.449798	0.501653	0.464636	0.730128	0.51792	0.559502	0.409294	0.405089		0.242687	0.236463	0.253237	0.145088	0.248925	0.301731	0.280053	0.254324		0.307515	0.261884	0.282126	0.124784	0.233155	0.138767	0.310653	0.340587
472	0.450103	0.501409	0.464462	0.73006	0.518322	0.557795	0.409728	0.404793		0.242956	0.236308	0.253789	0.144496	0.250441	0.302839	0.28004	0.255614		0.306941	0.262283	0.281749	0.125444	0.231238	0.139366	0.310232	0.339593
473	0.451339	0.50132	0.465681	0.729878	0.516404	0.557435	0.409517	0.404439		0.240215	0.237195	0.251902	0.14461	0.253409	0.303288	0.279941	0.256447		0.308446	0.261485	0.282417	0.125512	0.230186	0.139277	0.310542	0.339114
474	0.451285	0.501475	0.465072	0.730219	0.516652	0.557226	0.408823	0.404519		0.239982	0.23704	0.253499	0.144724	0.253378	0.304156	0.280399	0.256002		0.308733	0.261485	0.28143	0.125057	0.22997	0.138618	0.310777	0.339479
475	0.451751	0.500166	0.464752	0.730174	0.517085	0.558364	0.409034	0.404633		0.238639	0.238327	0.254108	0.143745	0.252543	0.303528	0.279037	0.255123		0.30961	0.261507	0.281139	0.126081	0.230372	0.138109	0.311929	0.340244
476	0.451411	0.500943	0.465507	0.729764	0.516837	0.557286	0.409257	0.40437		0.240161	0.23684	0.252628	0.144769	0.255697	0.303737	0.27983	0.254575		0.308428	0.262217	0.281865	0.125467	0.227465	0.138977	0.310913	0.341055
477	0.45107	0.499701	0.465362	0.72965	0.516899	0.556687	0.4087	0.404085		0.240519	0.238127	0.252221	0.144951	0.254244	0.303019	0.279297	0.254507		0.30841	0.262173	0.282417	0.125398	0.228857	0.140295	0.312004	0.341409
478	0.451357	0.500255	0.465101	0.730379	0.517518	0.556387	0.408662	0.404758		0.240663	0.239347	0.251437	0.144974	0.253966	0.30236	0.279012	0.253217		0.30798	0.260398	0.283462	0.124647	0.228517	0.141253	0.312326	0.342025
479	0.452038	0.500455	0.464259	0.73047	0.517116	0.557166	0.409195	0.404519		0.239552	0.237839	0.251669	0.145111	0.25412	0.30197	0.278702	0.254267		0.30841	0.261707	0.284072	0.12442	0.228764	0.140864	0.312103	0.341214
480	0.451715	0.500322	0.464956	0.730265	0.516064	0.555699	0.40948	0.404793		0.239498	0.237439	0.250102	0.146226	0.255976	0.304126	0.278764	0.253696		0.308786	0.262239	0.284943	0.123509	0.22796	0.140175	0.311756	0.341511
481	0.451106	0.500721	0.464694	0.72965	0.514858	0.555579	0.410261	0.405717		0.239301	0.23582	0.250247	0.14593	0.254955	0.304216	0.2789	0.253194		0.309592	0.263459	0.285059	0.12442	0.230186	0.140205	0.310839	0.341089
482	0.451626	0.50061	0.465449	0.730106	0.515786	0.555729	0.41031	0.405329		0.23828	0.235864	0.249027	0.146363	0.253316	0.303108	0.279148	0.253685		0.310094	0.263526	0.285523	0.123532	0.230898	0.141163	0.310542	0.340986
483	0.451178	0.50041	0.464375	0.730083	0.515075	0.55519	0.410397	0.406094		0.239319	0.23653	0.250102	0.146545	0.252141	0.303108	0.278021	0.252589		0.309503	0.26306	0.285523	0.123372	0.232784	0.141702	0.311582	0.341317
484	0.451106	0.500832	0.464375	0.728876	0.515539	0.555249	0.411053	0.405695		0.238782	0.235776	0.251815	0.146226	0.250472	0.30197	0.276819	0.253787		0.310112	0.263393	0.28381	0.124898	0.23399	0.14278	0.312128	0.340518
485	0.450282	0.500388	0.463852	0.729559	0.516188	0.556208	0.410384	0.405592		0.239749	0.235931	0.251786	0.146294	0.251368	0.301521	0.278058	0.254153		0.309969	0.263681	0.284362	0.124146	0.232444	0.142271	0.311558	0.340255
486	0.449494	0.500388	0.463997	0.730015	0.516992	0.557046	0.410236	0.405969		0.239606	0.236352	0.251263	0.144496	0.250904	0.300743	0.27724	0.25445		0.3109	0.263259	0.28474	0.125489	0.232104	0.142211	0.312524	0.339582
487	0.451339	0.500499	0.462459	0.73072	0.51693	0.557855	0.410075	0.406254		0.237797	0.236375	0.252482	0.143699	0.252605	0.300353	0.277215	0.25445		0.310864	0.263126	0.285059	0.12558	0.230465	0.141792	0.31271	0.339297
488	0.451196	0.500366	0.461065	0.731562	0.516435	0.558843	0.409344	0.407338		0.238495	0.23582	0.254312	0.142675	0.252853	0.298796	0.277575	0.253422		0.310309	0.263814	0.284623	0.125763	0.230712	0.142361	0.313082	0.339239
489	0.450551	0.500699	0.46092	0.731358	0.517889	0.559202	0.409207	0.407647		0.238674	0.23602	0.254254	0.143039	0.25378	0.298587	0.277513	0.253867		0.310775	0.263282	0.284827	0.125603	0.228331	0.142211	0.31328	0.338486
490	0.449279	0.500632	0.46092	0.73204	0.51727	0.559082	0.408885	0.407418		0.240663	0.235909	0.254312	0.142789	0.254028	0.297988	0.277488	0.253765		0.310058	0.263459	0.284769	0.125171	0.228702	0.14293	0.313627	0.338817
491	0.449279	0.502185	0.461559	0.732746	0.517858	0.558514	0.408427	0.40735		0.239857	0.234711	0.253557	0.141969	0.254059	0.298077	0.277984	0.254621		0.310864	0.263104	0.284885	0.125285	0.228084	0.143409	0.313589	0.338029
492	0.448957	0.502828	0.460542	0.732541	0.518352	0.558514	0.40777	0.407042		0.239893	0.232648	0.254805	0.144268	0.253842	0.297269	0.278083	0.253879		0.311151	0.264524	0.284652	0.12319	0.227805	0.144218	0.314147	0.33908
493	0.449655	0.503028	0.461326	0.732131	0.519064	0.558064	0.407238	0.406973		0.238764	0.232204	0.254457	0.144405	0.253564	0.297329	0.27895	0.253399		0.311581	0.264768	0.284217	0.123464	0.227373	0.144607	0.313812	0.339628
494	0.449512	0.503472	0.460688	0.731449	0.518291	0.557735	0.406841	0.40695		0.239427	0.233358	0.255386	0.145407	0.255481	0.297329	0.279582	0.254335		0.311061	0.263171	0.283927	0.123145	0.226228	0.144936	0.313577	0.338714
495	0.448867	0.504137	0.45912	0.731676	0.517765	0.558184	0.407002	0.407144		0.239893	0.232714	0.25768	0.145429	0.255512	0.297239	0.28118	0.254313		0.31124	0.263149	0.283201	0.122894	0.226723	0.144577	0.311818	0.338543
496	0.44824	0.503272	0.460194	0.731517	0.51826	0.558364	0.407126	0.407327		0.240717	0.233136	0.256983	0.144997	0.252791	0.29694	0.28061	0.253559		0.311043	0.263592	0.282823	0.123486	0.22895	0.144697	0.312264	0.339114
497	0.447721	0.504159	0.459991	0.731745	0.519156	0.556687	0.406123	0.408023		0.241541	0.23216	0.256721	0.143813	0.252945	0.300563	0.281614	0.252908		0.310739	0.263681	0.283288	0.124442	0.227898	0.14275	0.312264	0.339068
498	0.44781	0.503117	0.461036	0.731585	0.517796	0.556387	0.406655	0.40687		0.241541	0.234045	0.256867	0.143836	0.254151	0.301521	0.280486	0.25284		0.310649	0.262838	0.282097	0.124579	0.228053	0.142091	0.312859	0.34029
499	0.448168	0.502939	0.461007	0.731175	0.517518	0.556747	0.4073	0.406448		0.240663	0.234666	0.255676	0.143403	0.252945	0.30239	0.279631	0.253742		0.311169	0.262394	0.283317	0.125421	0.229537	0.140864	0.313069	0.33981
500	0.448312	0.503405	0.460484	0.731358	0.517703	0.558484	0.40694	0.406631		0.241845	0.23389	0.257157	0.144177	0.252389	0.301342	0.280251	0.253274		0.309843	0.262705	0.282359	0.124465	0.229908	0.140175	0.312809	0.340096
501	0.447953	0.504159	0.462313	0.730606	0.517301	0.558214	0.407324	0.406722		0.242687	0.233779	0.254602	0.144587	0.253595	0.301791	0.281304	0.252201		0.30936	0.262062	0.283085	0.124807	0.229104	0.139995	0.311372	0.341077

## Sheet: figure 4C
calculated equilibrium occupancy				simulated equilibrium occupancy
immobile	intermediate	fast		immobile	intermediate	fast
0.4596	0.2395	0.3008		0.448	0.2427	0.3094
0.5157	0.2304	0.2539		0.5042	0.2338	0.2621
0.5039	0.2427	0.2534		0.4623	0.2546	0.2831
0.7609	0.1333	0.1058		0.7306	0.1446	0.1248
0.548	0.2438	0.2082		0.5173	0.2536	0.2291
0.5914	0.2898	0.1188		0.5582	0.3018	0.14
0.4616	0.2645	0.2739		0.4073	0.2813	0.3114
0.4169	0.2521	0.331		0.4067	0.2522	0.3411
