# Supplementary material for: High-throughput, single-particle tracking reveals nested membrane domains that dictate KRasG12D diffusion and trafficking
Source: eLife journal article supplement (doi:10.7554/elife.46393), 2019-11-01
Supplement: supp [file elife-46393-supp-v1.zip › elife_poa_e46393_Figure_5_source_data_1.xlsx]

## Sheet: figure 5A
Net Flow 12 ms: Immobile (I)	Net Flow 12 ms: Intermediate (N)	Net Flow 12 ms: Fast (F)
0.0216	-0.0173	-0.0043
0.0036	0.0087	-0.0123
0.0081	-0.0015	-0.0067
0.0092	-0.0038	-0.0054
0.0041	0.006	-0.0101
0.0074	0.0043	-0.0117
0	0.0176	-0.0176
0.0166	-0.0045	-0.0121
0.0096	0.0051	-0.0147
0.011	0.0067	-0.0178
0.0124	0.0006	-0.013
0.0151	0.0028	-0.018
0.0104	0.0094	-0.0198
0.01	0.0089	-0.019
0.038	-0.0131	-0.0249
0.0283	0.0235	-0.0518
0.014	0.0086	-0.0226
0.0116	0.0081	-0.0197
0.0163	0.0067	-0.0229
0.009	0.0078	-0.0168
0.0092	0.0257	-0.0348
0.0084	0.0065	-0.0149

## Sheet: figure 5B
Ratio of In and Out Flux 12 ms: Immobile (I)	Ratio of In and Out Flux 12 ms: Intermediate (N)	Ratio of In and Out Flux 12 ms: Fast (F)
1.5821	0.7081	0.166
1.8282	1.5028	0.5194
2.3304	0.937	0.6604
2.3945	0.8826	0.7826
1.5706	1.2436	0.6258
2.5655	1.1828	0.5182
1.0009	2.149	0.3788
2.657	0.8951	0.6284
3.8129	1.2683	0.4622
5.2244	1.2082	0.5404
5.5709	1.0405	0.2124
5.4771	1.14	0.2407
6.2291	1.3262	0.4674
5.479	1.3096	0.4818
5.3316	0.6924	0.0709
11.6171	1.7595	0.0407
10.7205	1.2651	0.4476
5.325	1.2309	0.5379
6.4934	1.2657	0.3011
4.7941	1.2805	0.5288
5.7861	2.059	0.3089
6.1796	1.2332	0.5708

## Sheet: figure 5C
Net Flow per Arm 12 ms: F to N	Net Flow per Arm 12 ms: N to I	Net Flow per Arm 12 ms: I to F
0.0043	0.0216	0
0.0102	0.0015	-0.0021
0.0058	0.0073	-0.0008
0.0055	0.0093	0.0001
0.0092	0.0033	-0.0008
0.0112	0.0069	-0.0005
0.0162	-0.0014	-0.0014
0.0132	0.0177	0.0011
0.0086	0.0035	-0.0061
0.0161	0.0094	-0.0016
0.011	0.0104	-0.0019
0.0167	0.0139	-0.0013
0.0191	0.0097	-0.0007
0.0186	0.0097	-0.0004
0.0194	0.0325	-0.0056
0.0506	0.0271	-0.0012
0.0219	0.0133	-0.0007
0.0185	0.0104	-0.0011
0.0199	0.0132	-0.003
0.0156	0.0078	-0.0012
0.0349	0.0092	0
0.0133	0.0068	-0.0016
