# Supplementary material for: High-throughput, single-particle tracking reveals nested membrane domains that dictate KRasG12D diffusion and trafficking
Source: eLife journal article supplement (doi:10.7554/elife.46393), 2019-11-01
Supplement: supp [file elife-46393-supp-v1.zip › elife_poa_e46393_Figure_6_source_data_1.xlsx]

## Sheet: figure 6A
12 ms Diffusion Coefficients (µm2/s)
0 ng/mL Dox				2 ng/mL Dox				5 ng/mL Dox				10 ng/mL Dox
immobile	intermediate	fast		immobile	intermediate	fast		immobile	intermediate	fast		immobile	intermediate	fast
0.0453	0.1275	0.6757		0.0691	0.1596	0.8859		0.0696	0.2356	0.8656		0.0635	0.2408	0.8683
0.0588	0.1524	0.6911		0.0823	0.2517	0.7741		0.0687	0.1933	0.7652		0.0729	0.2439	0.8398
0.0559	0.1651	0.708		0.091	0.2853	0.7894		0.0637	0.2679	0.9618		0.0711	0.2395	0.8478
0.0423	0.212	0.8203		0.0943	0.2732	0.8272		0.0661	0.2562	0.9122		0.0941	0.289	0.8532
0.0892	0.3412	0.977		0.0731	0.287	0.8424		0.0753	0.2233	0.7707		0.0775	0.2549	0.9315
0.0915	0.3498	0.9917		0.0722	0.2438	0.8768		0.0669	0.2468	0.9204		0.0618	0.204	0.8043
0.1032	0.2988	0.8769		0.0735	0.2786	0.7882		0.0485	0.205	0.8671		0.104	0.3227	0.9369
0.0863	0.2978	0.8268		0.0841	0.2799	0.8113		0.0841	0.228	0.7705		0.0959	0.2904	0.9137
0.0823	0.36	0.954		0.0801	0.2709	0.8754		0.088	0.2524	0.8059		0.0795	0.2741	0.8629
0.0842	0.2786	0.831		0.0818	0.2669	0.8317		0.0811	0.2828	0.8257		0.0846	0.2876	0.8818
0.0665	0.2606	0.8523		0.0865	0.2856	0.9214		0.0731	0.272	0.8135		0.0672	0.2129	0.7987
0.0816	0.2818	0.8617		0.0835	0.2849	0.8594		0.0778	0.1822	0.7327		0.0659	0.1847	0.742
				0.0914	0.2885	0.8619		0.0973	0.2613	0.9693		0.0747	0.2762	0.8704
				0.0878	0.2956	0.9033		0.0849	0.3492	0.986		0.0735	0.2315	0.7606
				0.0468	0.1533	0.735		0.079	0.3127	0.8819		0.0583	0.1884	0.7857
				0.0534	0.1747	0.7923		0.0909	0.3898	0.9625		0.0709	0.246	0.8173
				0.0978	0.2961	0.9088		0.0742	0.2287	0.7365		0.0695	0.2112	0.7714
				0.0944	0.293	0.9183		0.0989	0.3895	0.9742		0.1037	0.2393	0.9176
				0.0878	0.2902	0.9421		0.0629	0.2306	0.825
				0.1	0.2841	0.8936		0.064	0.222	0.8041
				0.0943	0.3067	0.8794		0.0584	0.2181	0.8356
				0.088	0.2788	0.8916		0.0473	0.203	0.7485
								0.0615	0.2167	0.7819
								0.0697	0.26	0.8488
								0.0752	0.2531	0.7777
								0.0892	0.2769	0.8947
								0.0789	0.2654	0.891
								0.0905	0.281	0.9021
								0.0927	0.2871	0.8593
								0.0971	0.3153	0.8799

## Sheet: figure 6B
12 ms Occupancy (fraction)
0 ng/mL Dox				2 ng/mL Dox				5 ng/mL Dox				10 ng/mL Dox
immobile	intermediate	fast		immobile	intermediate	fast		immobile	intermediate	fast		immobile	intermediate	fast
0.2022	0.4989	0.2989		0.4849	0.4132	0.1019		0.2321	0.4426	0.3253		0.0603	0.3352	0.6045
0.3433	0.5384	0.1183		0.1308	0.2906	0.5786		0.2116	0.5715	0.2169		0.1099	0.3151	0.575
0.2841	0.5759	0.14		0.1663	0.3622	0.4715		0.149	0.4883	0.3627		0.0767	0.2919	0.6314
0.1389	0.4452	0.4159		0.1699	0.4166	0.4134		0.1688	0.5203	0.3108		0.1077	0.3878	0.5046
0.1958	0.4924	0.3118		0.1352	0.3914	0.4734		0.2484	0.4251	0.3265		0.0945	0.3755	0.53
0.1693	0.5085	0.3222		0.1175	0.2624	0.6201		0.1694	0.3875	0.4431		0.1738	0.283	0.5432
0.1159	0.3315	0.5526		0.1248	0.3674	0.5078		0.3475	0.4242	0.2284		0.1103	0.3052	0.5845
0.1543	0.3299	0.5158		0.197	0.4369	0.3661		0.182	0.5664	0.2516		0.1691	0.2391	0.5918
0.199	0.5516	0.2494		0.1039	0.238	0.6581		0.1349	0.2708	0.5944		0.1241	0.3216	0.5543
0.1592	0.3476	0.4931		0.105	0.2762	0.6187		0.2085	0.3394	0.4521		0.1083	0.2966	0.5951
0.103	0.3691	0.5279		0.1127	0.2954	0.5919		0.1022	0.3567	0.5411		0.1828	0.3422	0.475
0.1031	0.3019	0.595		0.1088	0.3297	0.5615		0.3493	0.4275	0.2231		0.131	0.313	0.5559
				0.0979	0.2716	0.6305		0.1962	0.409	0.3948		0.193	0.3455	0.4615
				0.0975	0.2851	0.6174		0.1733	0.3841	0.4426		0.1983	0.3332	0.4685
				0.1974	0.4506	0.352		0.1647	0.4305	0.4048		0.1364	0.2957	0.5679
				0.1841	0.3877	0.4282		0.1782	0.3877	0.4341		0.1623	0.3087	0.5291
				0.1499	0.3089	0.5412		0.0916	0.3193	0.5892		0.1264	0.3517	0.5219
				0.1342	0.3384	0.5274		0.1787	0.4016	0.4197		0.2894	0.3345	0.3761
				0.1243	0.3845	0.4911		0.0787	0.3447	0.5766
				0.1013	0.3078	0.5909		0.1597	0.3636	0.4767
				0.1233	0.3423	0.5344		0.0795	0.3517	0.5687
				0.0796	0.2872	0.6331		0.111	0.3895	0.4995
								0.1516	0.3785	0.4699
								0.1253	0.3225	0.5522
								0.1616	0.3686	0.4698
								0.0869	0.3324	0.5807
								0.133	0.3842	0.4828
								0.0871	0.2631	0.6498
								0.1075	0.3643	0.5282
								0.1	0.3641	0.5359

## Sheet: figure 6C
12 ms Net Flow (fraction per step)
0 ng/mL Dox				2 ng/mL Dox				5 ng/mL Dox				10 ng/mL Dox
immobile	intermediate	fast		immobile	intermediate	fast		immobile	intermediate	fast		immobile	intermediate	fast
0.0442	-0.0329	-0.0113		0.0216	-0.0173	-0.0043		0.014	0.0006	-0.0146		0.012	0.011	-0.023
0.0367	-0.0197	-0.017		0.0036	0.0087	-0.0123		0.014	0.0055	-0.0195		0.0154	0.0153	-0.0308
0.0438	-0.0184	-0.0254		0.0081	-0.0015	-0.0067		0.0112	-0.0029	-0.0083		0.01	0.0096	-0.0195
0.0236	-0.0021	-0.0216		0.0092	-0.0038	-0.0054		0.0121	-0.0037	-0.0084		0.024	0.0026	-0.0266
0.0058	-0.0013	-0.0046		0.0041	0.006	-0.0101		0.0197	-0.0074	-0.0124		0.023	0.0111	-0.0341
0.0046	0.004	-0.0085		0.0074	0.0043	-0.0117		0.0089	0.0024	-0.0114		0.0226	0.0074	-0.03
0.0055	0.0038	-0.0093		0	0.0176	-0.0176		0.0297	-0.0257	-0.004		0.0091	0.0025	-0.0116
0.0074	0.0006	-0.008		0.0166	-0.0045	-0.0121		0.0017	-0.034	0.0323		0.0046	0.0039	-0.0084
0.0088	-0.0033	-0.0055		0.0096	0.0051	-0.0147		0.0068	0.0024	-0.0092		0.0096	0.0036	-0.0132
0.0028	0.0057	-0.0085		0.011	0.0067	-0.0178		0.01	0.0011	-0.0111		0.0077	0.004	-0.0117
0.0046	0.0039	-0.0085		0.0124	0.0006	-0.013		0.0066	-0.0011	-0.0055		0.0143	-0.0123	-0.0019
0.0076	0.0105	-0.018		0.0151	0.0028	-0.018		0.0033	-0.0078	0.0045		0.0057	0.0019	-0.0075
				0.0104	0.0094	-0.0198		0.0051	-0.0434	0.0383		0.0089	0.0004	-0.0092
				0.01	0.0089	-0.019		0.0091	-0.0139	0.0048		0.0123	-0.0113	-0.001
				0.038	-0.0131	-0.0249		0.0076	-0.0033	-0.0043		0.0089	0.0023	-0.0112
				0.0283	0.0235	-0.0518		0.0094	-0.0171	0.0077		0.0105	-0.0063	-0.0042
				0.014	0.0086	-0.0226		0.0094	-0.0082	-0.0011		0.0058	0.0095	-0.0153
				0.0116	0.0081	-0.0197		0.0062	-0.011	0.0048		0.0085	-0.0121	0.0036
				0.0163	0.0067	-0.0229		0.0089	0.0011	-0.01
				0.009	0.0078	-0.0168		0.0157	0.0101	-0.0259
				0.0092	0.0257	-0.0348		0.0249	-0.0084	-0.0165
				0.0084	0.0065	-0.0149		0.0306	-0.0074	-0.0232
								0.0224	-0.011	-0.0114
								0.0141	-0.0047	-0.0094
								0.0178	0.0093	-0.027
								0.0136	0.0102	-0.0237
								0.0326	0.0031	-0.0357
								0.0114	0.0033	-0.0147
								0.0158	0.0095	-0.0254
								0.0092	-0.0019	-0.0073

## Sheet: figure 6D
12 ms Net Flow per Arm (fraction per step)
0 ng/mL Dox				2 ng/mL Dox				5 ng/mL Dox				10 ng/mL Dox
immobile	intermediate	fast		immobile	intermediate	fast		immobile	intermediate	fast		immobile	intermediate	fast
0.0076	0.0406	-0.0036		0.0043	0.0216	0		0.0137	0.0131	-0.0009		0.0228	0.0118	-0.0002
0.0164	0.0361	-0.0006		0.0102	0.0015	-0.0021		0.017	0.0115	-0.0026		0.0298	0.0145	-0.0009
0.0186	0.037	-0.0068		0.0058	0.0073	-0.0008		0.007	0.0099	-0.0013		0.0183	0.0087	-0.0012
0.0204	0.0224	-0.0012		0.0055	0.0093	0.0001		0.0036	0.0073	-0.0048		0.0257	0.0231	-0.0009
0.0045	0.0058	0		0.0092	0.0033	-0.0008		0.0115	0.0189	-0.0008		0.0314	0.0203	-0.0027
0.008	0.004	-0.0006		0.0112	0.0069	-0.0005		0.0112	0.0088	-0.0001		0.029	0.0216	-0.0009
0.0079	0.0041	-0.0013		0.0162	-0.0014	-0.0014		0.0023	0.028	-0.0017		0.0102	0.0078	-0.0014
0.004	0.0034	-0.004		0.0132	0.0177	0.0011		-0.0318	0.0022	0.0005		0.0073	0.0035	-0.0011
0.0056	0.0089	0.0001		0.0086	0.0035	-0.0061		0.0054	0.003	-0.0038		0.0113	0.0077	-0.0019
0.0071	0.0013	-0.0015		0.0161	0.0094	-0.0016		0.0085	0.0073	-0.0026		0.0101	0.0061	-0.0016
0.0075	0.0036	-0.0011		0.011	0.0104	-0.0019		0.0051	0.0062	-0.0004		0.0009	0.0132	-0.0011
0.017	0.0065	-0.0011		0.0167	0.0139	-0.0013		-0.0044	0.0034	0.0001		0.0071	0.0052	-0.0004
				0.0191	0.0097	-0.0007		-0.0378	0.0056	0.0005		0.0081	0.0078	-0.0011
				0.0186	0.0097	-0.0004		-0.0055	0.0084	-0.0008		-0.0017	0.0097	-0.0027
				0.0194	0.0325	-0.0056		-0.0018	0.0015	-0.0061		0.0106	0.0082	-0.0006
				0.0506	0.0271	-0.0012		-0.0086	0.0085	-0.0009		0.0035	0.0098	-0.0007
				0.0219	0.0133	-0.0007		-0.0017	0.0065	-0.0028		0.0152	0.0057	-0.0001
				0.0185	0.0104	-0.0011		-0.0053	0.0057	-0.0005		-0.0043	0.0078	-0.0007
				0.0199	0.0132	-0.003		0.0099	0.0088	-0.0001
				0.0156	0.0078	-0.0012		0.0255	0.0154	-0.0003
				0.0349	0.0092	0		0.0154	0.0238	-0.0011
				0.0133	0.0068	-0.0016		0.0222	0.0296	-0.001
								0.0085	0.0195	-0.0029
								0.0085	0.0132	-0.0009
								0.0269	0.0177	-0.0001
								0.022	0.0118	-0.0018
								0.0329	0.0298	-0.0028
								0.0109	0.0076	-0.0038
								0.0243	0.0147	-0.0011
								-0.0015	0.0004	-0.0088
