# Supplementary figures and images for: High-throughput, single-particle tracking reveals nested membrane domains that dictate KRasG12D diffusion and trafficking
Source: eLife journal article supplement (doi:10.7554/elife.46393), 2019-11-01

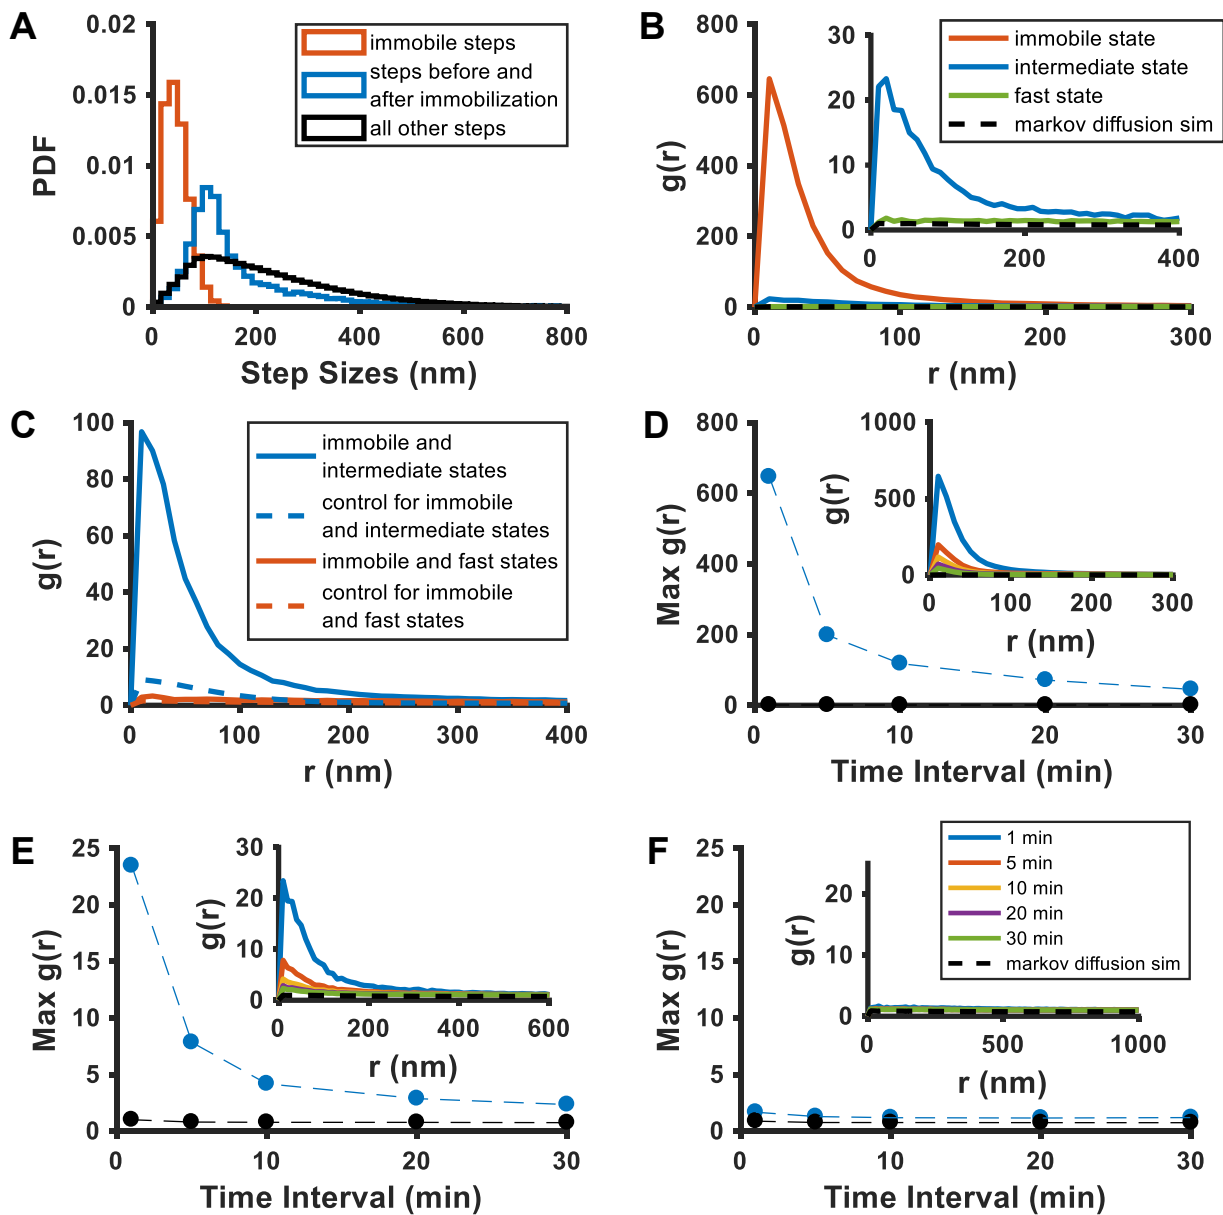

Figure 2 - Figure Supplement 1 (Lee et al.)

Supplement: supp [file elife-46393-supp-v1.zip]

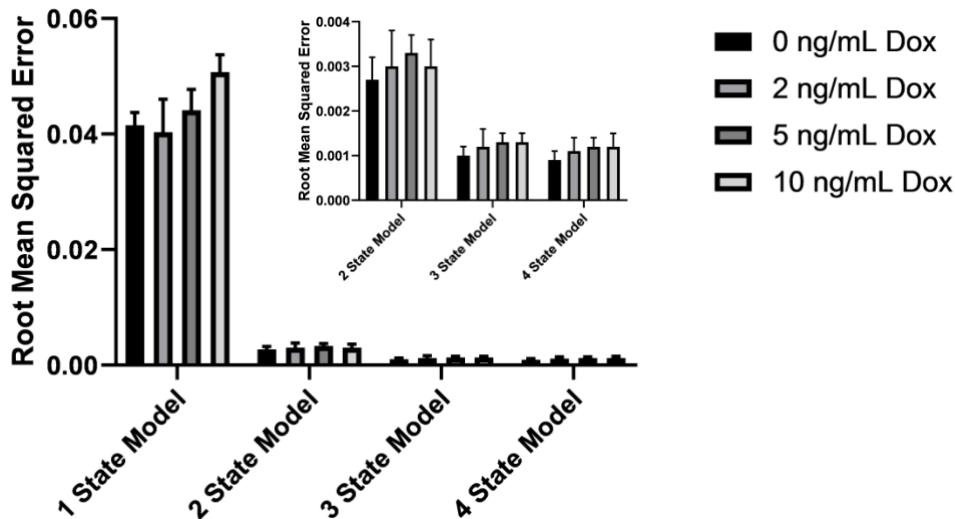

Figure 6 - Figure Supplement 2 (Lee et al.)

Supplement: supp [file elife-46393-supp-v1.zip]

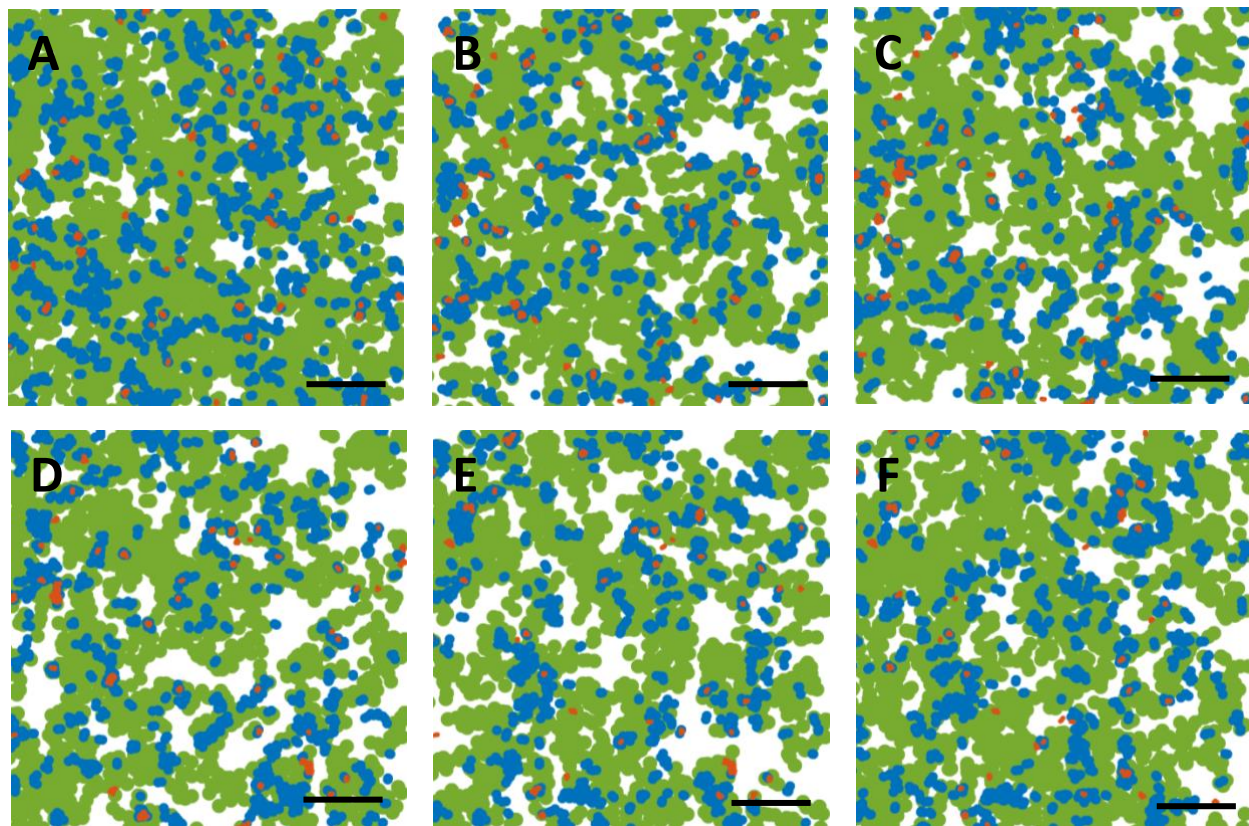

Figure 2 - Figure Supplement 2 (Lee et al.)

Supplement: supp [file elife-46393-supp-v1.zip]

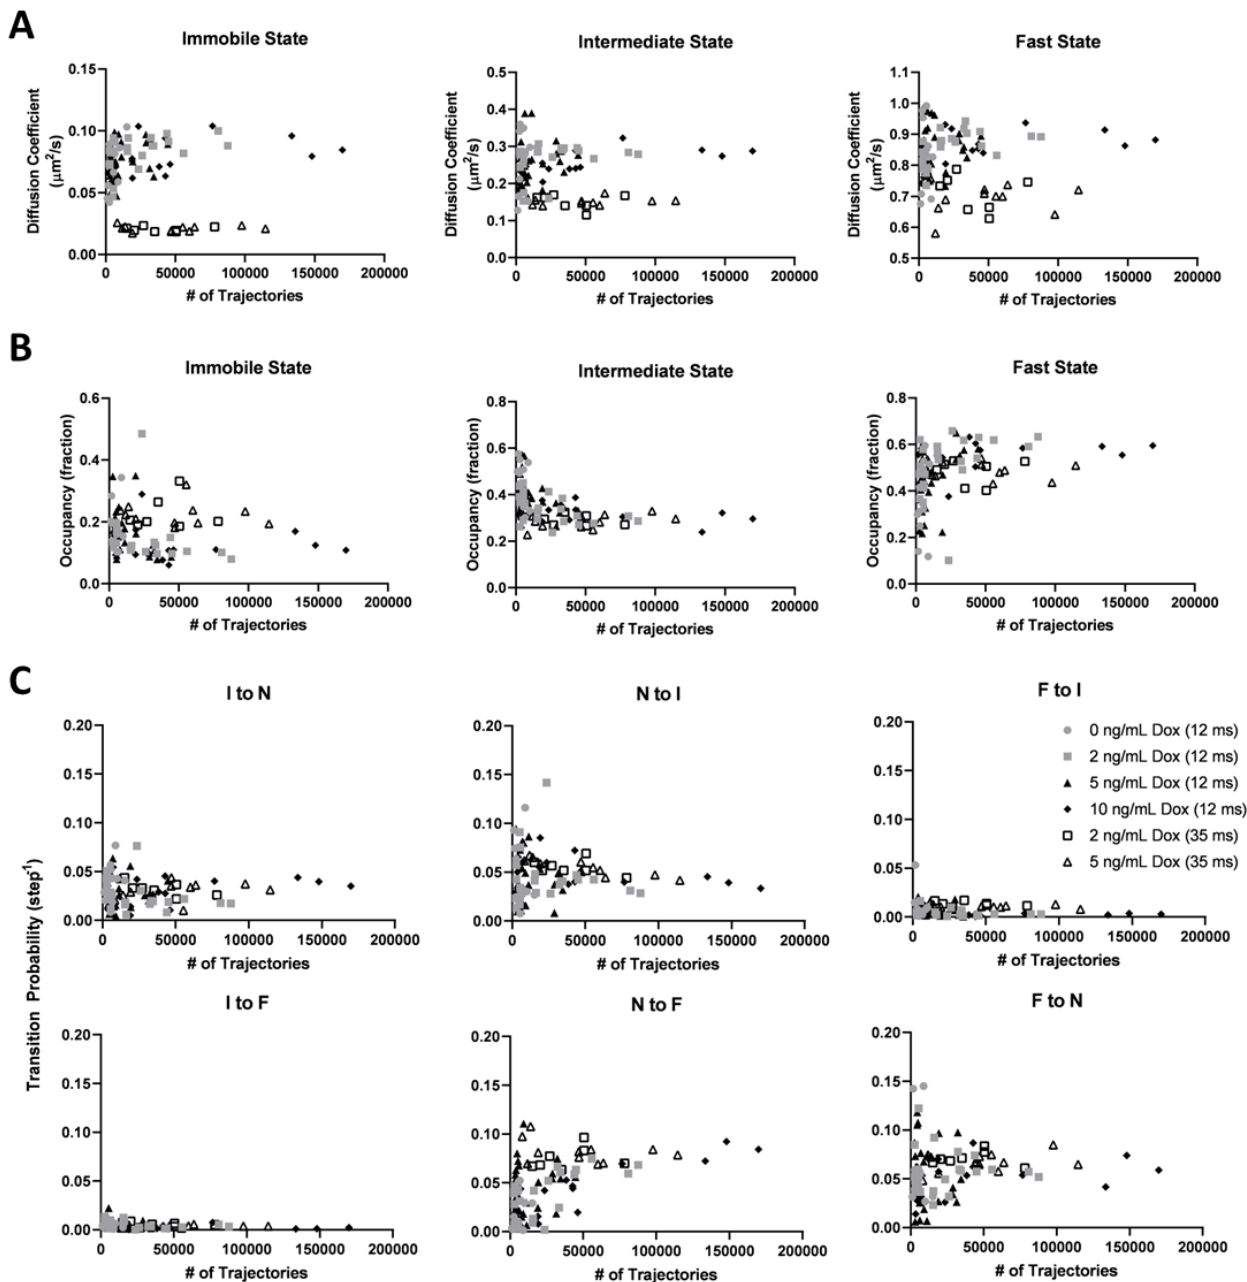

Figure 6 - Figure Supplement 1 (Lee et al.)

Supplement: supp [file elife-46393-supp-v1.zip]

**A**

| Model Size | Count of Movies with Model Size |
|------------|---------------------------------|
| 4          | 3                               |
| 5          | 3                               |
| 6          | 8                               |
| 8          | 1                               |

**B**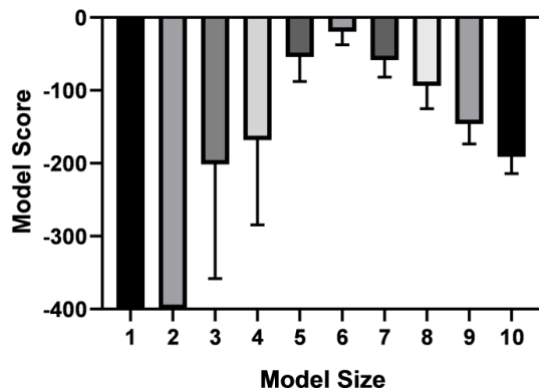**C**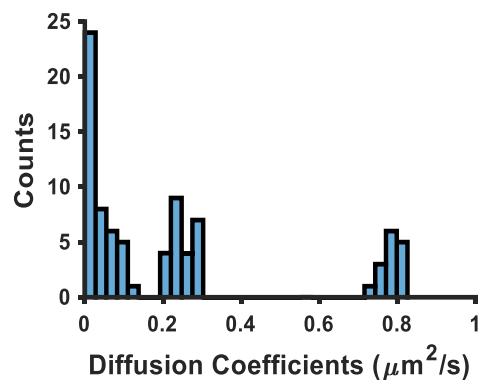

Figure 1 - Figure Supplement 5 (Lee et al.)

Supplement: supp [file elife-46393-supp-v1.zip]

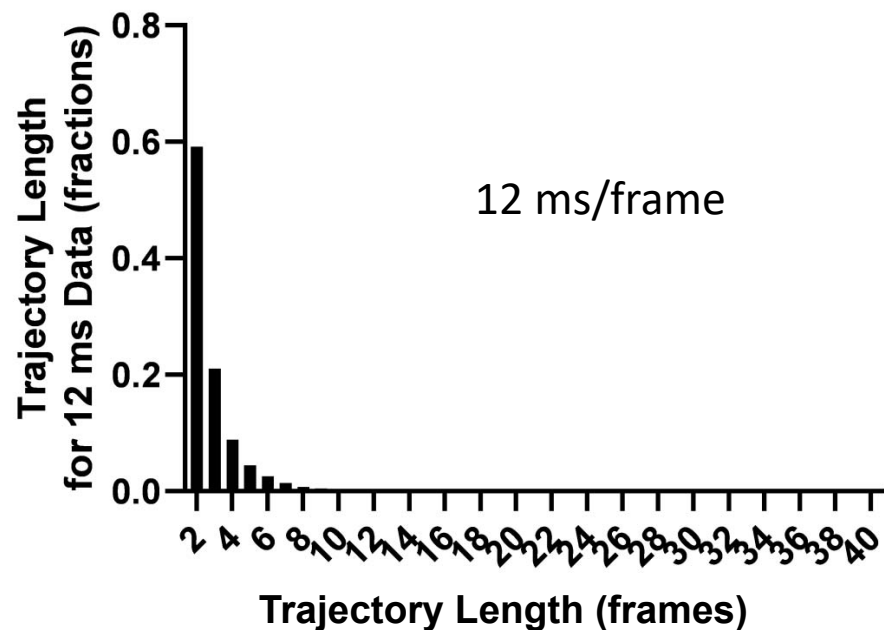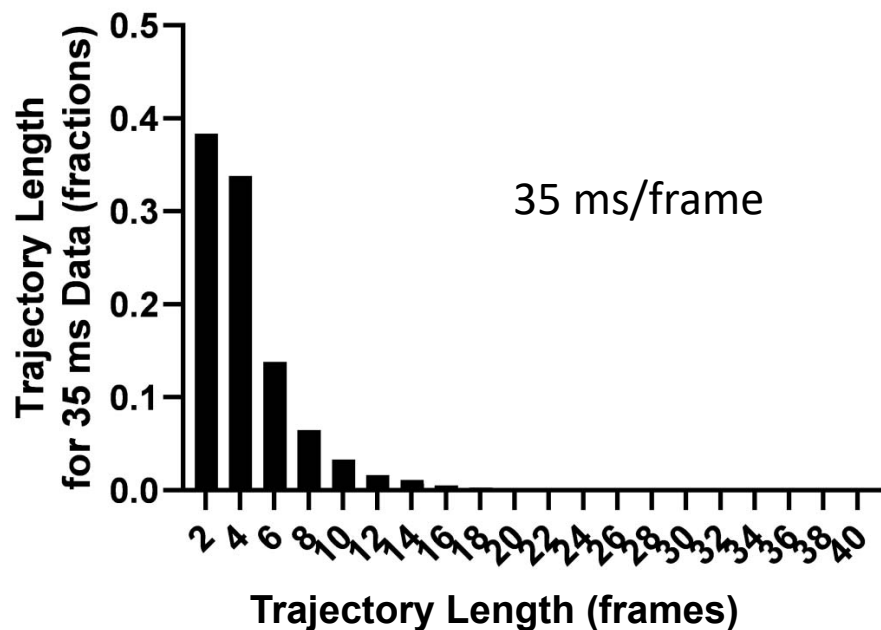

Figure 1 - Figure Supplement 1 (Lee et al.)

Supplement: supp [file elife-46393-supp-v1.zip]

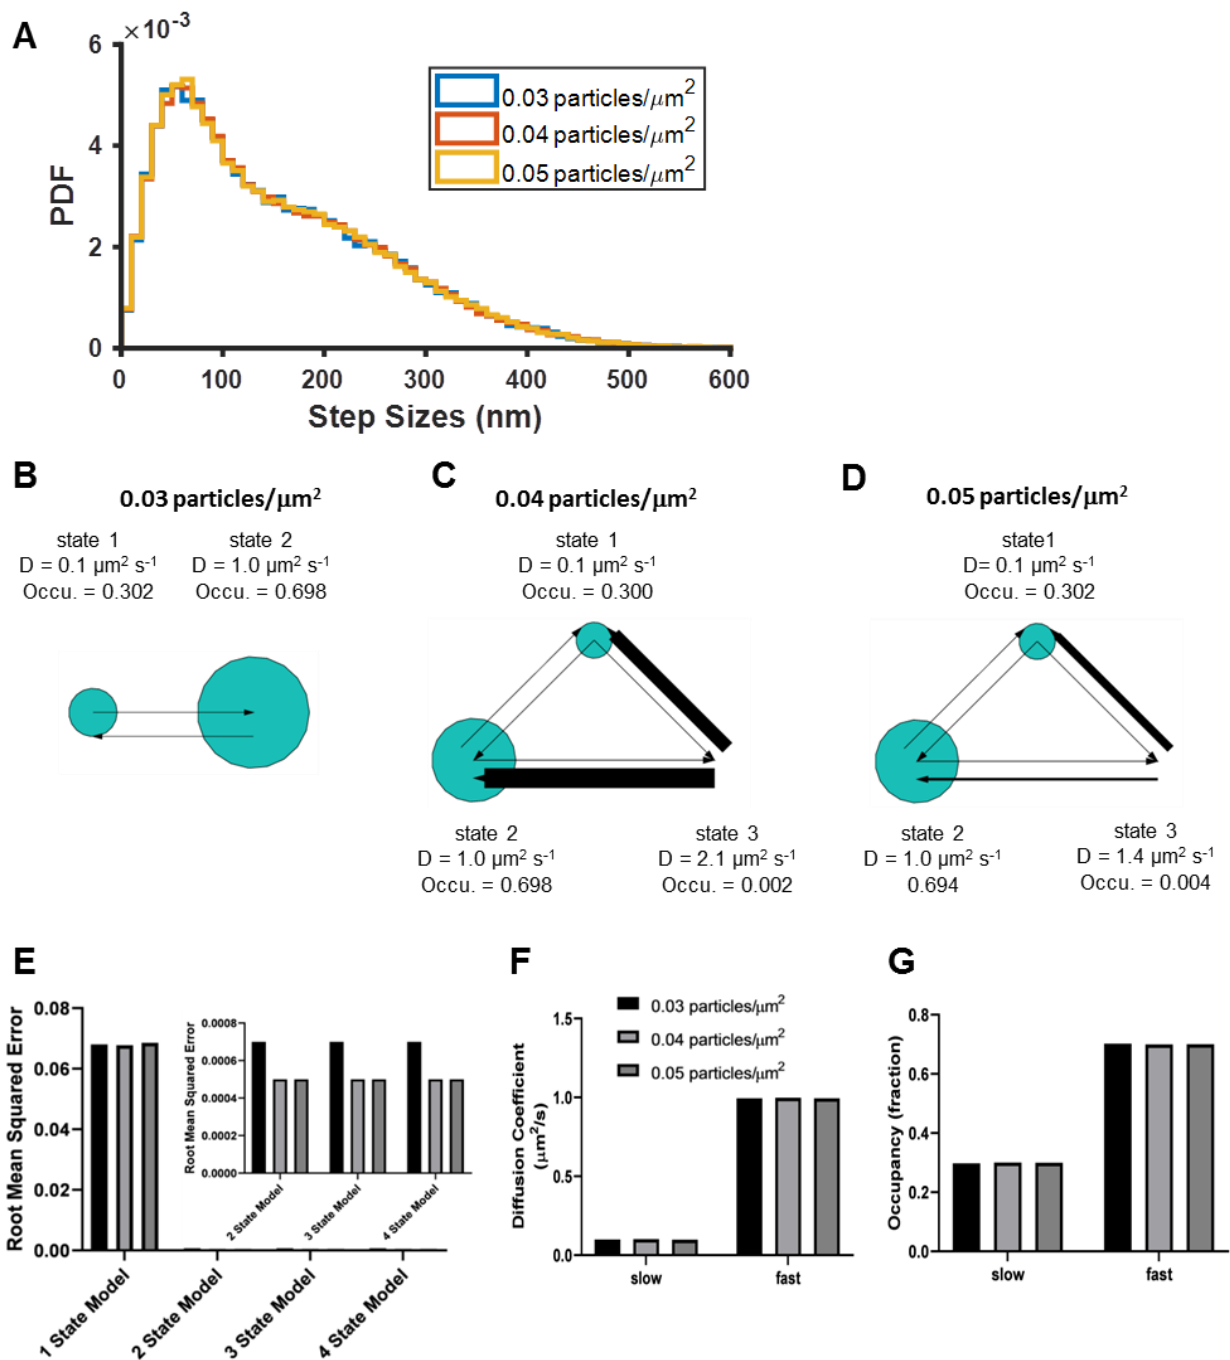

Figure 1 - Figure Supplement 2 (Lee et al.)

Supplement: supp [file elife-46393-supp-v1.zip]

**A**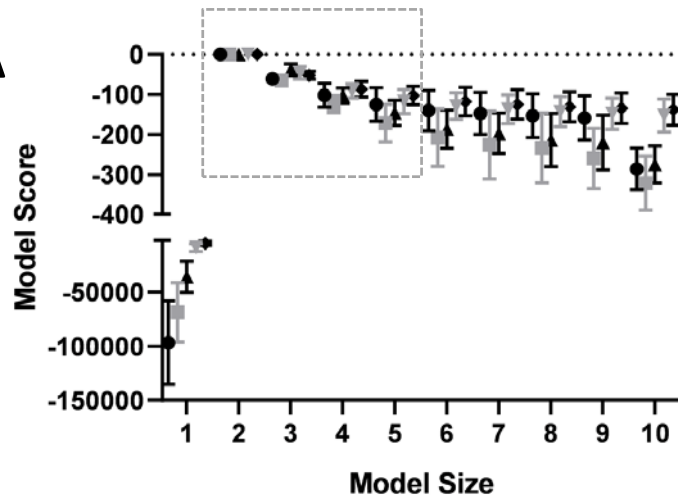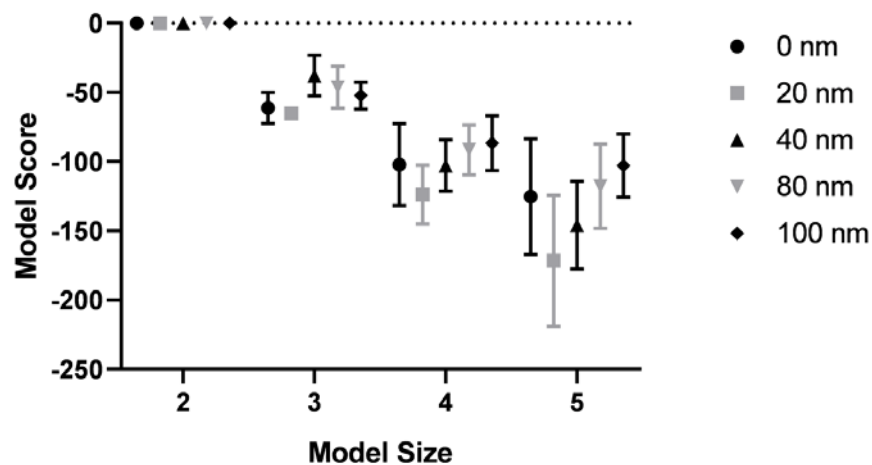**B**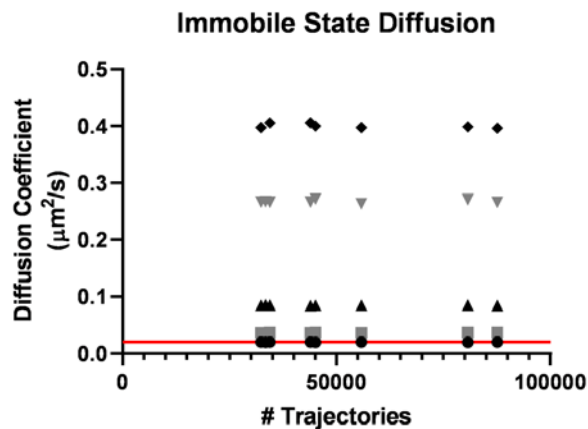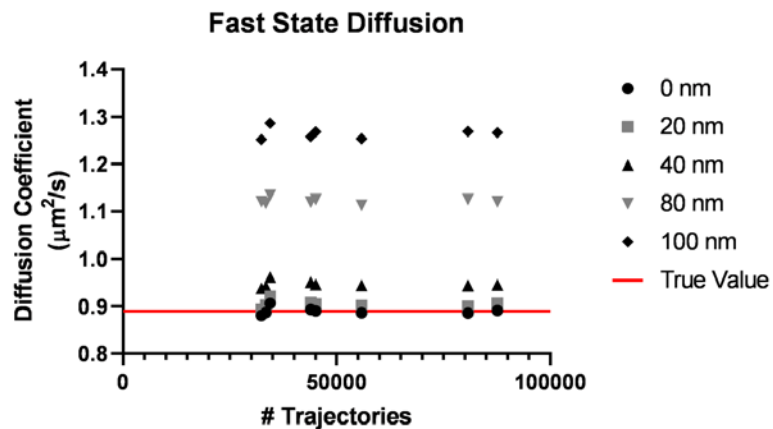**C**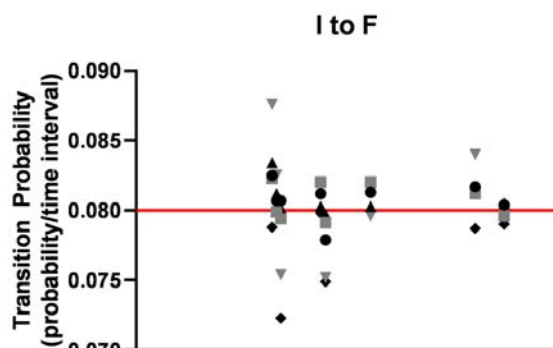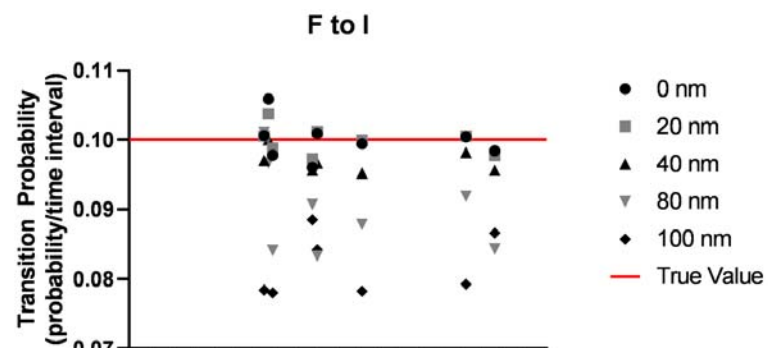

Figure 1 - Figure Supplement 4 (Lee et al.)

Supplement: supp [file elife-46393-supp-v1.zip]

**A**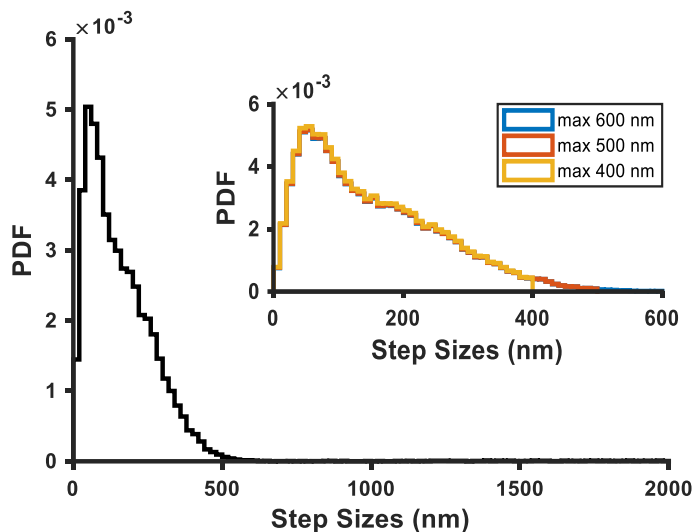**B**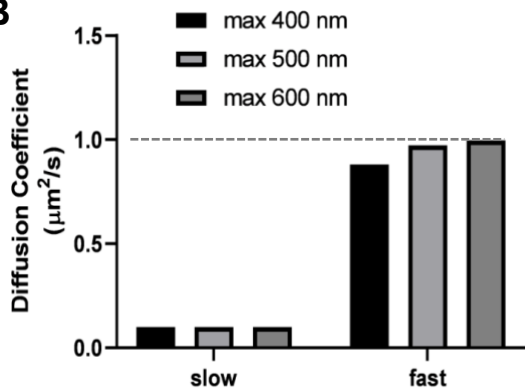**C**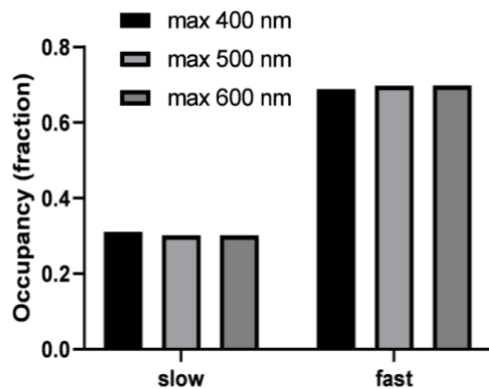

Figure 1 - Figure Supplement 3 (Lee et al.)

Supplement: supp [file elife-46393-supp-v1.zip]

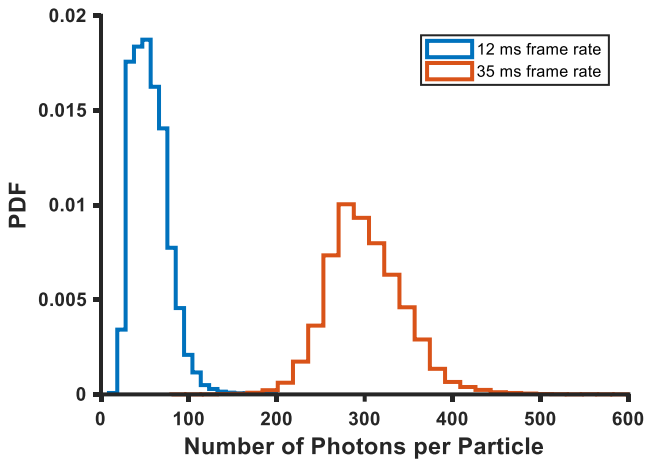

**Figure 1 - Figure Supplement 6 (Lee et al.)**

Supplement: supp [file elife-46393-supp-v1.zip]

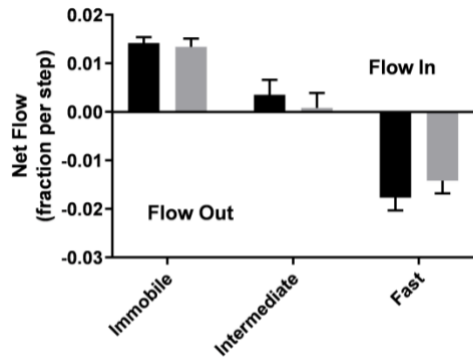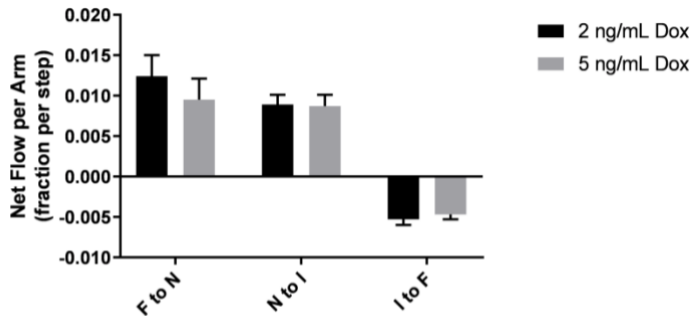

**Figure 6 - Figure Supplement 3 (Lee et al.)**

Supplement: supp [file elife-46393-supp-v1.zip]
